# Supplementary material for: Integrating and visualizing primary data from prospective and legacy taxonomic literature
Source: Biodivers Data J. 2015 May 12;(3):e5063. doi: 10.3897/BDJ.3.e5063 (PMC4442254; doi:10.3897/BDJ.3.e5063)
Supplement: Supplementary material 2 — World Spider Catalog Bibliographic Data: Publications [file biodiversity_data_journal-3-e5063-s002.csv]

Rank	Publisher	Total	Cumulative	Cumulative proportion
1	Zootaxa	509	509	0.041124667
2	Acta Arachnologica, Tokyo	404	913	0.073765856
3	Bulletin of the British Arachnological Society	377	1290	0.10422558
4	Journal of Arachnology	359	1649	0.133230993
5	Arthropoda Selecta	259	1908	0.154156904
6	Acta Zootaxonomica Sinica	248	2156	0.17419407
7	American Museum Novitates	231	2387	0.19285772
8	Korean Arachnology	224	2611	0.210955805
9	Revue Suisse de Zoologie	175	2786	0.225094934
10	Annals and Magazine of Natural History	163	2949	0.238264523
11	Acta Arachnologica Sinica	158	3107	0.251030137
12	Senckenbergiana Biologica	145	3252	0.262745415
13	Annales de la Société Entomologique de France	134	3386	0.273571948
14	Proceedings of the Zoological Society of London	114	3500	0.282782581
15	Atypus	106	3606	0.291346853
16	Zoologicheski? Zhurnal	99	3705	0.29934556
17	Bulletin du Muséum National d'Histoire Naturelle de Paris	98	3803	0.307263473
18	Psyche, Cambridge	94	3897	0.314858205
19	ZooKeys	94	3991	0.322452937
20	Revista Ibérica de Aracnología	93	4084	0.329966874
21	Revue Arachnologique	92	4176	0.337400016
22	Bulletin of the American Museum of Natural History	84	4260	0.344186798
23	Beiträge zur Araneologie	83	4343	0.350892785
24	Bulletin of the Museum of Comparative Zoology at Harvard College	81	4424	0.357437182
25	Arachnologische Mitteilungen	79	4503	0.363819989
26	Revue Zoologique Africaine	79	4582	0.370202796
27	Records of the Zoological Survey of India	77	4659	0.376424012
28	Arachnologisches Magazin	76	4735	0.382564434
29	Memoirs of the Queensland Museum	74	4809	0.388543266
30	Zoologischer Anzeiger	72	4881	0.394360507
31	Annales Zoologici, Warszawa	68	4949	0.399854569
32	The Canadian Entomologist	64	5013	0.40502545
33	Tarantulas of the World	63	5076	0.410115537
34	Physis, Revista de la Sociedad Argentina de Ciencias Naturales	59	5135	0.414882443
35	Bulletin de la Société Entomologique de France	57	5192	0.41948776
36	Iheringia, Série Zoologia	57	5249	0.424093076
37	Journal of the Bombay Natural History Society	56	5305	0.428617597
38	Journal of Natural History	55	5360	0.433061323
39	Serket	54	5414	0.437424255
40	Genus	51	5465	0.441544801
41	Journal of The New York Entomological Society	48	5513	0.445422962
42	Newsletter of the British Arachnological Society	47	5560	0.449220328
43	Bulletin de la Société Zoologique de France	46	5606	0.452936899
44	Memórias do Instituto Butantan	44	5650	0.45649188
45	Records of the Australian Museum	44	5694	0.460046861
46	Fragmenta Entomologica	42	5736	0.463440252
47	Revue de Zoologie et de Botanique Africaines	42	5778	0.466833643
48	Entomological News	40	5818	0.470065444
49	Records of the Western Australian Museum	40	5858	0.473297245
50	Zoological Journal of the Linnean Society	40	5898	0.476529046
51	Annales de la Société Entomologique de Belgique	39	5937	0.479680052
52	Mitteilungen der Schweizerischen Entomologischen Gesellschaft	39	5976	0.482831058
53	Reichenbachia	39	6015	0.485982064
54	Revista Brasileira de Zoologia	39	6054	0.489133069
55	Revista de la Sociedad Entomológica Argentina	37	6091	0.492122485
56	Annali del Museo Civico di Storia Naturale di Genova	36	6127	0.495031106
57	Archiv für Naturgeschichte	36	6163	0.497939727
58	Berichte des Naturwissenschaftlich-Medizinischen Vereins in Innsbruck	36	6199	0.500848348
59	Bulletin de la Société d'Histoire Naturelle de Toulouse	36	6235	0.503756969
60	Bulletin of the National Museum of Nature and Science Tokyo	36	6271	0.506665589
61	Acta Zoologica Bulgarica	33	6304	0.509331825
62	Journal of the Bethune Medical University	33	6337	0.511998061
63	Annales, Musée Royal de l'Afrique Centrale, Sciences zoologiques	32	6369	0.514583502
64	Verhandlungen der Kaiserlich-Königlichen Zoologisch-Botanischen Gesellschaft in Wien	32	6401	0.517168942
65	Zoologica Scripta	32	6433	0.519754383
66	Nieuwsbrief van de Belgische Arachnologische Vereniging	31	6464	0.522259029
67	Proceedings of the Academy of Natural Sciences of Philadelphia	30	6494	0.52468288
68	Entomologische Zeitschrift, Frankfurt a.M.	29	6523	0.527025935
69	Munis Entomology and Zoology	29	6552	0.529368991
70	Zoologia (Curitiba)	29	6581	0.531712047
71	Invertebrate Systematics	28	6609	0.533974307
72	Transactions of the Connecticut Academy of Arts and Sciences	28	6637	0.536236568
73	Bulletin of the National Museum of Nature and Science Tokyo (A)	27	6664	0.538418033
74	Peckhamia	27	6691	0.540599499
75	Poeyana	27	6718	0.542780965
76	Proceedings of the Indian Academy Of Science	27	6745	0.54496243
77	Revista Brasileira de Entomologia	27	6772	0.547143896
78	The Raffles Bulletin of Zoology	27	6799	0.549325362
79	Transactions of the American Microscopical Society	27	6826	0.551506827
80	Annales of the Entomological Society of America	26	6852	0.553607498
81	Annals of the Natal Museum	26	6878	0.555708168
82	Tijdschrift voor Entomologie	26	6904	0.557808839
83	Transactions of the New Zealand Institute	26	6930	0.55990951
84	Vestnik Zoologii	26	6956	0.56201018
85	Arachnologischer Anzeiger	25	6981	0.564030056
86	Bulletin de l'Institut Royal des Sciences Naturelles de Belgique	25	7006	0.566049931
87	Contributions to Natural History	25	7031	0.568069807
88	Proceedings of the Dorset Natural History and Antiquarian Field Club	25	7056	0.570089682
89	Proceedings of the Linnean Society of New South Wales	25	7081	0.572109558
90	Tokai University Press	25	7106	0.574129434
91	Anais da Academia Brasileira de Ciências	24	7130	0.576068514
92	Arthropoda	24	7154	0.578007595
93	Atti della Società Italiana di Scienze Naturali e del Museo Civico di Storia Naturale di Milano	23	7177	0.57986588
94	Entomon	23	7200	0.581724166
95	Journal of Zoology, London	23	7223	0.583582451
96	African Invertebrates	22	7245	0.585359942
97	Archives de Zoologie Expérimentale et Générale	22	7267	0.587137432
98	Entomologicheskoe Obozrenie	22	7289	0.588914923
99	Festschrift Embrik Strand	22	7311	0.590692413
100	Iheringia	22	7333	0.592469904
101	Papers and Proceedings of the Royal Society of Tasmania	22	7355	0.594247394
102	Verhandlungen des Naturwissenschaftlichen Vereins in Hamburg	22	7377	0.596024885
103	Zoologische Beiträge	22	7399	0.597802375
104	Bulletin of the British Museum of Natural History	21	7420	0.599499071
105	Bulletin of the University of Utah	21	7441	0.601195766
106	Journal of Hebei University, Natural Science Edition	21	7462	0.602892462
107	Memorie della Società Entomologica Italiana, Genova	21	7483	0.604589157
108	Sichuan Journal of Zoology	21	7504	0.606285853
109	Biociências	20	7524	0.607901753
110	British Tarantula Society Journal	20	7544	0.609517654
111	Entomologica Scandinavica	20	7564	0.611133554
112	Entomologisk Tidskrift	20	7584	0.612749455
113	Folia Zoologica et Hydrobiologica, Rig?	20	7604	0.614365355
114	Oriental Insects	20	7624	0.615981256
115	Revista Chilena de Historia Natural	20	7644	0.617597156
116	Sinozoology	20	7664	0.619213056
117	Studies on Neotropical Fauna and Environment	20	7684	0.620828957
118	Animalia	19	7703	0.622364062
119	Annales Zoologici Fennici	19	7722	0.623899168
120	Journal of Afrotropical Zoology	19	7741	0.625434273
121	Proceedings of the California Academy of Sciences	19	7760	0.626969379
122	Trudy Zoologieskogo Instituta Akademija Nauk SSSR	19	7779	0.628504484
123	V?stník ?eskoslovenské Zoologické Spole?nosti v Praze	19	7798	0.63003959
124	Bollettino della Società Entomologica Italiana	18	7816	0.6314939
125	Bulletin & Annales de la Société Entomologique de Belgique	18	7834	0.63294821
126	Proceedings of the Biological Society of Washington	18	7852	0.634402521
127	Spixiana	18	7870	0.635856831
128	Zoologische Jahrbücher, Abteilung für Systematik, Geographie und Biologie der Tiere	18	7888	0.637311142
129	Zoologische Mededelingen	18	7906	0.638765452
130	Breviora	17	7923	0.640138967
131	Journal of the Speleological Society of Japan	17	7940	0.641512483
132	Norsk Entomologisk Tidsskrift	17	7957	0.642885998
133	Psyche	17	7974	0.644259514
134	Records of the Canterbury Museum	17	7991	0.645633029
135	Turkish Journal of Arachnology	17	8008	0.647006544
136	Australian Journal of Zoology	16	8024	0.648299265
137	Berliner Entomologische Zeitschrift	16	8040	0.649591985
138	Bulletin International de l'Academie des Sciences de Cracovie	16	8056	0.650884706
139	Journal of Hebei Normal University	16	8072	0.652177426
140	Korean Journal of Systematic Zoology	16	8088	0.653470146
141	Przegl?d Zoologiczny	16	8104	0.654762867
142	Travaux de l’Institut de Spéologie “Émile Racovitza”	16	8120	0.656055587
143	Arachnides	15	8135	0.657267512
144	Arkiv för Zoologi	15	8150	0.658479438
145	Boletim do Museu Nacional do Rio de Janeiro	15	8165	0.659691363
146	Israel Journal of Zoology	15	8180	0.660903288
147	Jahrbücher des Nassauischen Vereins für Naturkunde	15	8195	0.662115214
148	Journal of the Institute of Natural Sciences, Keimyung University	15	8210	0.663327139
149	Records of the Indian Museum, Calcutta	15	8225	0.664539064
150	Revue Française d'Entomologie	15	8240	0.66575099
151	Zeitschrift für die Gesammten Naturwissenschaften	15	8255	0.666962915
152	Acta Universitatis Carolinae Biologica	14	8269	0.668094045
153	Acta Zoologica Lilloana	14	8283	0.669225176
154	Faculty of Letters Revue, Otemon Gakuin University	14	8297	0.670356306
155	Folia Entomologica Hungarica	14	8311	0.671487436
156	Heptathela	14	8325	0.672618567
157	Indian Journal of Arachnology	14	8339	0.673749697
158	Journal of Hunan Teachers College	14	8353	0.674880827
159	Journal of Threatened Taxa	14	8367	0.676011958
160	Mémoires de Biospéologie	14	8381	0.677143088
161	Memoirs of the National Science Museum Tokyo	14	8395	0.678274218
162	Pakistan Journal of Zoology	14	8409	0.679405349
163	Phelsuma	14	8423	0.680536479
164	Proceedings of the Japanese Society of Systematic Zoology	14	8437	0.681667609
165	Revista Brasileira de Biologia	14	8451	0.68279874
166	Revista del Museo Argentino de Ciencias Naturales Bernardino Rivadavia	14	8465	0.68392987
167	Science and Culture	14	8479	0.685061
168	Zoology in the Middle East	14	8493	0.686192131
169	Bulletin of the Zoological Survey of India	13	8506	0.687242466
170	Fauna of Arabia	13	8519	0.688292801
171	Florida Entomologist	13	8532	0.689343136
172	Insect Systematics & Evolution	13	8545	0.690393472
173	Journal of Natural Science of Hunan Normal University	13	8558	0.691443807
174	Journal of Norman Bethune University of Medical Sciences	13	8571	0.692494142
175	Journal of the British Tarantula Society	13	8584	0.693544478
176	Journal of the Linnean Society of London, Zoology	13	8597	0.694594813
177	Loški Razgledi	13	8610	0.695645148
178	Osaka Arachnologists' Group	13	8623	0.696695484
179	Records of the Western Australian Museum, Supplement	13	8636	0.697745819
180	The Pan-Pacific Entomologist	13	8649	0.698796154
181	Turkish Journal of Zoology	13	8662	0.699846489
182	Annals of the Transvaal Museum	12	8674	0.70081603
183	Boletín de la Asociación Española de Entomología	12	8686	0.70178557
184	Boletín de la Sociedad Entomologica Aragonesa	12	8698	0.70275511
185	Calodema	12	8710	0.703724651
186	Caucasian Entomological Bulletin	12	8722	0.704694191
187	Invertebrate Taxonomy	12	8734	0.705663731
188	Journal of the Huizhou Teachers College	12	8746	0.706633271
189	Memorie del Museo Civico di Storia Naturale di Verona	12	8758	0.707602812
190	Miscellanea Zoologica	12	8770	0.708572352
191	Sitzungsberichte der Gesellschaft Naturforschender Freunde zu Berlin	12	8782	0.709541892
192	Zoosystema	12	8794	0.710511432
193	Annals of the South African Museum	11	8805	0.711400178
194	Bulletin Mensuel de la Société Linnéenne de Lyon	11	8816	0.712288923
195	Bulletin of the Biogeographical Society of Japan	11	8827	0.713177668
196	Canadian Journal of Zoology	11	8838	0.714066414
197	Current Science	11	8849	0.714955159
198	European Journal of Taxonomy	11	8860	0.715843904
199	Mitteilungen aus dem Zoologischen Museum in Berlin	11	8871	0.716732649
200	Navorsinge van die Nasionale Museum Bloemfontein	11	8882	0.717621395
201	Papers of the Michigan Academy of Science, Arts and Letters	11	8893	0.71851014
202	Records of the South Australian Museum	11	8904	0.719398885
203	Revista do Museu Paulista	11	8915	0.72028763
204	Texas Memorial Museum Speleological Monographs	11	8926	0.721176376
205	Acta Scientiarum Naturalium Universitatis Normalis Hunanensis	10	8936	0.721984326
206	Annalen des Naturhistorischen Museums in Wien	10	8946	0.722792276
207	Annales de Spéléologie	10	8956	0.723600226
208	Biologisch Jaarboek Dodonaea	10	8966	0.724408176
209	Bulletin de la Société Scientifique de Bretagne	10	8976	0.725216127
210	Bulletin de l'Institut Royal des Sciences Naturelles de Belgique, Entomologie	10	8986	0.726024077
211	Bulletin of the British Spider Study Group	10	8996	0.726832027
212	Denisia	10	9006	0.727639977
213	Deutsche Entomologische Zeitschrift	10	9016	0.728447928
214	Entomologiceskie issledovanija v Kirgizii	10	9026	0.729255878
215	Entomologist's Monthly Magazine	10	9036	0.730063828
216	Fragmenta Faunistica, Warsaw	10	9046	0.730871778
217	Journal of Morphology	10	9056	0.731679729
218	Korean Journal of Zoology	10	9066	0.732487679
219	Linzer Biologische Beiträge	10	9076	0.733295629
220	Molecular Phylogenetics and Evolution	10	9086	0.734103579
221	Otago Museum Bulletin	10	9096	0.734911529
222	Physis, Revista de la Sociedad Argentina de Ciencias Naturales, Sección C	10	9106	0.73571948
223	Proceedings of the Entomological Society of Washington	10	9116	0.73652743
224	Schriften der Naturforschenden Gesellschaft in Danzig	10	9126	0.73733538
225	Zoological Studies	10	9136	0.73814333
226	Acta Zoologica Fennica	9	9145	0.738870486
227	Actas Congreso Ibérico de Entomología, León	9	9154	0.739597641
228	BioFormosa	9	9163	0.740324796
229	?asopis ?eskoslovenské Spole?nosti Entomologické	9	9172	0.741051951
230	Cladistics	9	9181	0.741779106
231	Entomologica Basiliensis	9	9190	0.742506262
232	Entomologiske Meddelelser	9	9199	0.743233417
233	Esakia	9	9208	0.743960572
234	Göteborgs Kungliga Vetenskaps och Witterhets Samhället Handlingar	9	9217	0.744687727
235	Horae Societatis Entomologicae Rossicae	9	9226	0.745414882
236	Life Science Research	9	9235	0.746142038
237	Magasin de Zoologie	9	9244	0.746869193
238	Papéis Avulsos do Departamento de Zoologia, Secretaria de Agricultura, Sao Paolo	9	9253	0.747596348
239	Polskie Pismo Entomologiczne	9	9262	0.748323503
240	Transactions of the Natural History Society of Northumberland	9	9271	0.749050658
241	Travaux du Muséum National d’Histoire Naturelle “Grigore Antipa”	9	9280	0.749777814
242	University of Perm	9	9289	0.750504969
243	Verhandlungen des Naturhistorischen Vereins der Preussischen Rheinlande und Westfalens	9	9298	0.751232124
244	Zoological Survey of India	9	9307	0.751959279
245	Acta Zoologica Bulgarica Supplement	8	9315	0.752605639
246	Actes de la Société Linnéenne de Bordeaux	8	9323	0.753252
247	Annales Historico-Naturales Musei Nationalis Hungarici	8	9331	0.75389836
248	Annali del Museo Civico di Storia Naturale Giacomo Doria	8	9339	0.75454472
249	Atti e Memorie, Commissione Grotte "Eugenio Boegan"	8	9347	0.75519108
250	Bulletin of the Polish Academy of Science, Biological Sciences	8	9355	0.75583744
251	Entomologische Berichten, Amsterdam	8	9363	0.756483801
252	Hessische Faunistische Briefe	8	9371	0.757130161
253	Journal of the Asiatic Society of Bengal	8	9379	0.757776521
254	Kagaku-sekai	8	9387	0.758422881
255	Lejiegod Zoologicheskii Instituta Muzeya Akademii Nauk SSSR St. Petersburg	8	9395	0.759069241
256	Memoranda Societatis pro Fauna et Flora Fennica	8	9403	0.759715602
257	Naturalist	8	9411	0.760361962
258	Neotropica	8	9419	0.761008322
259	Nova Guinea	8	9427	0.761654682
260	Pacific Insects	8	9435	0.762301042
261	Pacific Science	8	9443	0.762947402
262	Phytophylactica	8	9451	0.763593763
263	Proceedings of the United States National Museum	8	9459	0.764240123
264	Published by the author	8	9467	0.764886483
265	Revista de Agricultura, Piracicaba	8	9475	0.765532843
266	Revista del Museo de La Plata	8	9483	0.766179203
267	Science Press	8	9491	0.766825564
268	Spined, Nieuwsbrief Spinnenwerkgroep Nederland	8	9499	0.767471924
269	The Philippine Entomologist	8	9507	0.768118284
270	Transactions of the Linnean Society of London	8	9515	0.768764644
271	Abhandlungen der Naturhistorischen Gesellschaft zu Nürnberg	7	9522	0.769330209
272	Andrias	7	9529	0.769895774
273	Annales des Sciences Naturelles, Zoologie, Paris	7	9536	0.77046134
274	Archives des Sciences, Genève	7	9543	0.771026905
275	Belgian Journal of Zoology	7	9550	0.77159247
276	Bulletin de la Société des Sciences Naturelles du Maroc	7	9557	0.772158035
277	Bulletin de la Société Royale Belge d'Entomologie	7	9564	0.7727236
278	Bulletin du Musée Royal d'Histoire Naturelle de Belgique	7	9571	0.773289165
279	Carinthia II	7	9578	0.773854731
280	Communications de la Faculté des Sciences de l'Université d'Ankara, Serie C	7	9585	0.774420296
281	Garciana	7	9592	0.774985861
282	International Journal of Speleology	7	9599	0.775551426
283	Journal of African Zoology	7	9606	0.776116991
284	Journal of Dali University	7	9613	0.776682556
285	Journal of Hubei University, Natural Science Edition	7	9620	0.777248122
286	Journal of the Quekett Microscopical Club	7	9627	0.777813687
287	Öfversigt af Kongliga Vetenskaps-Akademiens Förhandlingar	7	9634	0.778379252
288	Proceedings of the Royal Society of Victoria	7	9641	0.778944817
289	Publicaciones del Departamento de Zoología, Universidad de Barcelona	7	9648	0.779510382
290	Publicações Culturais da Companhia de Diamantes de Angola	7	9655	0.780075947
291	Records of the Albany Museum Grahamstown	7	9662	0.780641512
292	Research Review of Kyungpook National University	7	9669	0.781207078
293	Revue Suisse de Zoologie, Volume Hors Série	7	9676	0.781772643
294	Smithsonian Contributions to Zoology	7	9683	0.782338208
295	Tethys Entomological Research	7	9690	0.782903773
296	Transactions of the Wisconsin Academy of Sciences, Arts and Letters	7	9697	0.783469338
297	Verhandlungen der Naturforschenden Gesellschaft in Basel	7	9704	0.784034903
298	Zoologische Verhandelingen	7	9711	0.784600469
299	Zoologiska Bidrag från Uppsala	7	9718	0.785166034
300	Zoo's Print Journal	7	9725	0.785731599
301	Abhandlungen der Naturforschenden Gesellschaft Görlitz	6	9731	0.786216369
302	Abhandlungen der Senckenbergischen Naturforschenden Gesellschaft	6	9737	0.786701139
303	Acta Zoologica Sinica	6	9743	0.787185909
304	Acta Zoologica, Stockholm	6	9749	0.787670679
305	African Entomology	6	9755	0.78815545
306	American Midland Naturalist	6	9761	0.78864022
307	American Naturalist	6	9767	0.78912499
308	Annotationes Zoologicae Japonenses	6	9773	0.78960976
309	Arthropoda Scientia	6	9779	0.79009453
310	Arthropoda Selecta, Special Issue	6	9785	0.7905793
311	Atti del Museo Civico di Storia Naturale di Trieste	6	9791	0.79106407
312	Bihang till Kongliga Svenska Vetenskaps-Akademiens Handlingar	6	9797	0.791548841
313	Boletim da Sociedade Portuguesa de Ciencias Naturais	6	9803	0.792033611
314	Bollettino del Museo Civico di Storia Naturale di Venezia	6	9809	0.792518381
315	Bollettino del Museo Civico di Storia Naturale di Verona	6	9815	0.793003151
316	Bollettino del Museo Regionale di Scienze Naturali di Torino	6	9821	0.793487921
317	Boston Journal of Natural History	6	9827	0.793972691
318	Broteria	6	9833	0.794457461
319	Entomologica Fennica	6	9839	0.794942232
320	Entomologica Germanica	6	9845	0.795427002
321	Entomological Research	6	9851	0.795911772
322	Entomologické Listy, Brno	6	9857	0.796396542
323	Entomologische Abhandlungen, Staatliches Museum für Tierkunde Dresden	6	9863	0.796881312
324	Eurasian Entomological Journal	6	9869	0.797366082
325	Insecta Mundi	6	9875	0.797850852
326	Investigaciones Zoolo?gicas Chilenas	6	9881	0.798335623
327	Journal of Hubei University	6	9887	0.798820393
328	Journal of Lanzhou University Natural Sciences	6	9893	0.799305163
329	Journal of the Entomological Society of South Africa	6	9899	0.799789933
330	Journal of the Washington Academy of Sciences	6	9905	0.800274703
331	Kishidaia	6	9911	0.800759473
332	Mémoires du Muséum National d'Histoire Naturelle de Paris	6	9917	0.801244243
333	New York State Museum Bulletin	6	9923	0.801729013
334	New Zealand Journal of Zoology	6	9929	0.802213784
335	Norwegian Journal of Entomology	6	9935	0.802698554
336	Ohio Journal of Science	6	9941	0.803183324
337	Physis	6	9947	0.803668094
338	PLoS One	6	9953	0.804152864
339	Proceedings of the 6<sup>th</sup> International Arachnological Congress	6	9959	0.804637634
340	Proceedings of the Linnean Society of London	6	9965	0.805122404
341	Ray Society	6	9971	0.805607175
342	Redia	6	9977	0.806091945
343	Revista de Biologia e Hygiene, Sao Paolo	6	9983	0.806576715
344	Revue et Magasin de Zoologie Pure et Appliquée	6	9989	0.807061485
345	Rozprawy i Sprawozdania z Posiedzen Wydzialu Matematyczno Przyrodniczego Akademji Umiejetnosci, Krakow	6	9995	0.807546255
346	Solenodon	6	10001	0.808031025
347	Soobshcheniia Akademii Nauk Gruzinskoi SSR	6	10007	0.808515795
348	Studii ?i Comunic?ri Muzeul Brukenthal, ?tiin ?e Naturale	6	10013	0.809000566
349	Stuttgarter Beiträge zur Naturkunde	6	10019	0.809485336
350	Symposia of the Zoological Society of London	6	10025	0.809970106
351	Theses collection of Kyungpook University	6	10031	0.810454876
352	Transactions of the Entomological Society of London	6	10037	0.810939646
353	Zoological Research	6	10043	0.811424416
354	Zoologische Jahrbücher	6	10049	0.811909186
355	Aarhus University Press	5	10054	0.812313162
356	Acta Zoologica Academiae Scientiarum Hungaricae	5	10059	0.812717137
357	Acta Zoologica Hungarica	5	10064	0.813121112
358	Actas X Congreso Internacional de Aracnologia. Barcelona	5	10069	0.813525087
359	Anales del Museo Nacional de Historia Natural de Buenos Aires	5	10074	0.813929062
360	Annales Générales des Sciences Physiques	5	10079	0.814333037
361	Anzeiger der Österreichische Akademie der Wissenschaften, Mathematisch-Naturwissenschatliche Klasse	5	10084	0.814737012
362	Arachnological Society of East Asia	5	10089	0.815140987
363	Arachnology	5	10094	0.815544962
364	Archives de l'Institut Grand-Ducal de Luxembourg	5	10099	0.815948938
365	Archivos da Escola Superior de Agricultura e Medicina Veterinaria, Rio de Janeiro	5	10104	0.816352913
366	Arquivos do Museu Nacional do Rio de Janeiro	5	10109	0.816756888
367	Arthropod Systematics & Phylogeny	5	10114	0.817160863
368	Asia Life Sciences	5	10119	0.817564838
369	Association for Mexican Cave Studies Bulletin	5	10124	0.817968813
370	Bihang till Kungliga Svenska Vetenskaps-Akademiens Handlingar	5	10129	0.818372788
371	Biological Bulletin of India	5	10134	0.818776763
372	Biota Neotropica	5	10139	0.819180738
373	Boletín de la Sociedad Entomológica de España	5	10144	0.819584714
374	Bollettino dei Musei di Zoologia ed Anatomia Comparata della Reale Università di Torino	5	10149	0.819988689
375	Bulletin de la Société Imperiale des Naturalists de Moscou	5	10154	0.820392664
376	Bulletin of the Akiyoshi-dai Museum of Natural History	5	10159	0.820796639
377	Cimbebasia	5	10164	0.821200614
378	Comunicaciones Zoologicas del Museo de Historia Natural de Montevideo	5	10169	0.821604589
379	Congrès International de Spéléologie	5	10174	0.822008564
380	Decheniana	5	10179	0.822412539
381	Dongwuxue zazhi (Chinese Journal of Zoology)	5	10184	0.822816515
382	Edaphologia	5	10189	0.82322049
383	Educational Journal of the Teacher's College Kyungpook National University	5	10194	0.823624465
384	Entomologica Americana	5	10199	0.82402844
385	Fauna Fennica	5	10204	0.824432415
386	Fauna och Flora	5	10209	0.82483639
387	Fauna Saudi Arabia	5	10214	0.825240365
388	Faunistische Abhandlungen, Staatliches Museum für Tierkunde Dresden	5	10219	0.82564434
389	Izvestiya Akademii Nauk Turkmenskoi SSR Seriya Biologicheskikh Nauk	5	10224	0.826048315
390	Izvestiya na Tsarskite Prirodonauchni Instituti v Sofia	5	10229	0.826452291
391	Journal of Entomology and Zoology	5	10234	0.826856266
392	Journal of Shadong University	5	10239	0.827260241
393	Journal of the Arizona Academy of Science	5	10244	0.827664216
394	Journal of the Australian Entomological Society	5	10249	0.828068191
395	Journal of the Baoding Teachers College	5	10254	0.828472166
396	KMK Scientific Press	5	10259	0.828876141
397	Le Grotte d'Italia, Trieste	5	10264	0.829280116
398	London and Edinburgh Philosophical Magazine and Journal of Science	5	10269	0.829684091
399	Mem. Qld Mus.-Nature	5	10274	0.830088067
400	Mitteilungen über Höhlen- und Karstforschung	5	10279	0.830492042
401	Monitore Zoologico Italiano	5	10284	0.830896017
402	Opuscula Zoologica Instituti Zoosystematici et Oecologici Universitatis Budapestinensis	5	10289	0.831299992
403	Pirineos	5	10294	0.831703967
404	P?írodov?dné práce ústav? ?eskoslovenské Akademie V?d v Brn?	5	10299	0.832107942
405	Proceedings of the Royal Physical Society of Edinburgh	5	10304	0.832511917
406	Proceedings, 8. Internationaler Arachnologen-Kongress Wien 1980	5	10309	0.832915892
407	Records of the Zoological Survey of India, Occasional Paper	5	10314	0.833319867
408	Résultats des Expéditions Biospéologiques Cubano-Roumaines à Cuba	5	10319	0.833723843
409	Revista del Museo Argentino de Ciencias Naturales, Nueva Serie	5	10324	0.834127818
410	Revista Mexicana de Biodiversidad	5	10329	0.834531793
411	Sitzungsberichte der Österreichischen Akademie der Wissenschaften	5	10334	0.834935768
412	Societas Entomologica, Organ für den Internationalen Entomologen-Verein	5	10339	0.835339743
413	Spisanié na Beulgarskata Akademia na Naoukite	5	10344	0.835743718
414	Transactions and Proceedings of the Royal Society of South Australia	5	10349	0.836147693
415	Transactions of the Sapporo Natural History Society	5	10354	0.836551668
416	Vie Milieu	5	10359	0.836955644
417	Zeitschrift für Morphologie und Ökologie der Tiere	5	10364	0.837359619
418	Zoologica	5	10369	0.837763594
419	Zoologica (New York)	5	10374	0.838167569
420	Abhandlungen des Naturwissenschaftlichen Vereins in Hamburg	4	10378	0.838490749
421	Abhandlungen des Naturwissenschaftlichen Vereins zu Bremen	4	10382	0.838813929
422	Acta Biologica Venezuelica	4	10386	0.839137109
423	Acta Entomologica Bohemoslovaca	4	10390	0.839460289
424	Acta Universitatis Lundensis	4	10394	0.839783469
425	African Zoology	4	10398	0.840106649
426	Anales del Instituto Biológico de la Universidad Nacional Autónoma de México	4	10402	0.84042983
427	Arachnological News	4	10406	0.84075301
428	Arachnologorum Congressus Internationalis V, Proceedings of the Fifth International Congress on Arachnology, Brno, Folk C (ed)	4	10410	0.84107619
429	Archivio Zoologico Italiano	4	10414	0.84139937
430	Atti della Società Toscana di Scienze Naturali	4	10418	0.84172255
431	Australian Journal of Entomology	4	10422	0.84204573
432	Biologia Gabonica	4	10426	0.84236891
433	Biološki vestnik Ljubljana	4	10430	0.84269209
434	Bulletin de la Societé des Sciences Naturelles, Venette-Compiègne	4	10434	0.84301527
435	Bulletin de la Société d'Histoire Naturelle d'Afrique du Nord	4	10438	0.84333845
436	Bulletin de l'Académie Polonaise des Sciences	4	10442	0.84366163
437	Bulletin de l'Institut Fondamental d'Afrique Noire	4	10446	0.843984811
438	Bulletin of the Osaka Museum of Natural History	4	10450	0.844307991
439	Bulletin of Zoological Nomenclature	4	10454	0.844631171
440	Cahiers Musée des Confluences - Études scientifiques	4	10458	0.844954351
441	Chinese Journal of Zoology, Peking	4	10462	0.845277531
442	Commentationes Biologicae	4	10466	0.845600711
443	Courier Forschungsinstitut Senckenberg	4	10470	0.845923891
444	Dar Al Ummah	4	10474	0.846247071
445	Die Natur (Wien)	4	10478	0.846570251
446	Dugesiana	4	10482	0.846893431
447	Entomologiste	4	10486	0.847216611
448	Exploration du Parc National de l'Upemba, Mission G. F. de Witte	4	10490	0.847539792
449	Fauna India	4	10494	0.847862972
450	Fitzgerald Publishing	4	10498	0.848186152
451	Hong-kong Naturalist	4	10502	0.848509332
452	Hunan Normal University Press	4	10506	0.848832512
453	Iranian Journal of Animal Biosystematics	4	10510	0.849155692
454	Jahrbuch der Hamburgischen Wissenschaftlichen Anstalten	4	10514	0.849478872
455	Jahreshefte des Vereins für vaterländische Naturkunde in Württemberg	4	10518	0.849802052
456	Journal and Proceedings of the Royal Society of Western Australia	4	10522	0.850125232
457	Journal of Agricultural Science Tokyo Nogyo Daigaku	4	10526	0.850448412
458	Journal of Jilin Medical University	4	10530	0.850771592
459	Journal of the August 1<sup>st</sup> Agricultural College	4	10534	0.851094773
460	Journal of the Entomological Society of Australia, New South Wales	4	10538	0.851417953
461	Journal of the Faculty of Agriculture Kyushu University	4	10542	0.851741133
462	Journal of the Hangzhou Normal College	4	10546	0.852064313
463	Journal of the Royal Society of Western Australia	4	10550	0.852387493
464	Korean Journal of Plant Protection	4	10554	0.852710673
465	Korean Journal of Soil Zoology	4	10558	0.853033853
466	Lansania	4	10562	0.853357033
467	Meddelelser om Grønland	4	10566	0.853680213
468	Memoirs of the Museum of Victoria	4	10570	0.854003393
469	Memoirs of the National Museum of Nature and Science Tokyo	4	10574	0.854326573
470	Memorias de la Sociedad Cubana de Historia Natural "Felipe Poey"	4	10578	0.854649754
471	Mikrokosmos	4	10582	0.854972934
472	Neue Entomologische Nachrichten	4	10586	0.855296114
473	Notes biospéologiques	4	10590	0.855619294
474	Nouveau Dictionnaire d'Histoire Naturelle, Paris	4	10594	0.855942474
475	Novitates Caribaea	4	10598	0.856265654
476	Nyt Magazin for Naturvidenskaberne	4	10602	0.856588834
477	Occasional Papers of the Natural History Society of Wisconsin	4	10606	0.856912014
478	Organisms Diversity & Evolution	4	10610	0.857235194
479	Phegea	4	10614	0.857558374
480	Práce Moravské P?írodov?decké Spole?nosti	4	10618	0.857881554
481	Proceedings of the 16<sup>th</sup> European Colloquium of Arachnology	4	10622	0.858204735
482	Proceedings of the Ninth International Congress of Arachnology, Panama 1983	4	10626	0.858527915
483	Proceedings of the Zoological Institute of the Russian Academy of Sciences	4	10630	0.858851095
484	Proceedings of the Zoological Society, Calcutta	4	10634	0.859174275
485	Quaderno, Accademia Nazionale dei Lincei	4	10638	0.859497455
486	Rendiconti, Istituto Lombardo di Scienze e Lettere	4	10642	0.859820635
487	Research Branch Agriculture Canada Publication	4	10646	0.860143815
488	Sonoda Women's College Studies	4	10650	0.860466995
489	Studii ?i Cercet?ride Biologie	4	10654	0.860790175
490	Tierwelt Deutschlands	4	10658	0.861113355
491	Transactions and Proceedings of the Royal Society of New Zealand	4	10662	0.861436536
492	Transactions of the Norfolk and Norwich Naturalists' Society	4	10666	0.861759716
493	Tropical Zoology	4	10670	0.862082896
494	Tuhinga	4	10674	0.862406076
495	Veröffentlichungen des Museum Ferdinandeum in Innsbruck	4	10678	0.862729256
496	Zoological Magazine,Tokyo	4	10682	0.863052436
497	5<sup>ème</sup> Colloque d'Arachnologie d'Expression Française, Barcelona	3	10685	0.863294821
498	Acta Laser Biology Sinica	3	10688	0.863537206
499	Acta Literaria Scientia Universalis Hungarica	3	10691	0.863779591
500	Acta Musei Moraviae, Scientiae Biologicae	3	10694	0.864021976
501	Acta Societatis Zoologicae Bohemicae	3	10697	0.864264361
502	Akademia Nauk SSSR	3	10700	0.864506746
503	American Arachnology	3	10703	0.864749131
504	Anales de la Sociedad Española de Historia Natural	3	10706	0.864991517
505	Animal Biology	3	10709	0.865233902
506	Annalen des Naturhistorischen Museums in Wien, Serie B	3	10712	0.865476287
507	Annales de la Société d'Histoire Naturelle de Toulon	3	10715	0.865718672
508	Annales of the Durban Museum	3	10718	0.865961057
509	Arachnologia	3	10721	0.866203442
510	Archiv for Mathematik og Naturvidenskab Christiania	3	10724	0.866445827
511	Archives of Biological Science Belgrade	3	10727	0.866688212
512	Arnoldia Zimbabwe	3	10730	0.866930597
513	Arquivos de Zoologia do Estado de Sao Paulo	3	10733	0.867172982
514	Atti dell' Accademia Gioenia di Scienze Naturali in Catania	3	10736	0.867415367
515	Atti della Società Veneto-Trentina di Scienze Naturali, Padova	3	10739	0.867657752
516	Australian Entomological Magazine	3	10742	0.867900137
517	Australian Entomologist	3	10745	0.868142522
518	Australian Zoologist	3	10748	0.868384907
519	Bernice P. Bishop Museum Bulletin	3	10751	0.868627293
520	Biological Diversity and Conservation	3	10754	0.868869678
521	Boletim Biológico Sao Paulo	3	10757	0.869112063
522	Boletim do Museu Municipal do Funchal	3	10760	0.869354448
523	Boletín de la Real Sociedad Española de Historia Natural (Seccion Biologica)	3	10763	0.869596833
524	Boletin de la Sociedad de Biologia de Concepcion	3	10766	0.869839218
525	Bollettino dell'Accademia Gioenia di Scienze Naturali	3	10769	0.870081603
526	Bonner Zoologische Beiträge	3	10772	0.870323988
527	Brenesia	3	10775	0.870566373
528	Buletinul Facultatii de Stiinte din Cernauti	3	10778	0.870808758
529	Bulletin of miscellaneous information, Royal Botanic Gardens, Kew	3	10781	0.871051143
530	Bulletin of the Brooklyn Entomological Society	3	10784	0.871293528
531	Bulletin of the Sounkyo Museum of Natural History	3	10787	0.871535913
532	Collins	3	10790	0.871778298
533	Commentationes Pontificia Academia Scientiarum	3	10793	0.872020684
534	Comunicaciones del Museo Argentino de Ciencias Naturales "Bernardino Rivadavia"	3	10796	0.872263069
535	Comunicari de zoologie, Societatea de ?tiin?e Biologice din Republica Socialista România,Bucure?ti	3	10799	0.872505454
536	Det Kongelige Norske Videnskabers Selskabs Skrifter	3	10802	0.872747839
537	Doklady Akademii Nauk Tadzhikistan SSR	3	10805	0.872990224
538	Doriana	3	10808	0.873232609
539	Educational Journal Kyungpook University Korea	3	10811	0.873474994
540	Ekológia (Bratislava)	3	10814	0.873717379
541	Entomologische Zeitschrift, Stuttgart	3	10817	0.873959764
542	Eos	3	10820	0.874202149
543	Estudios de "Belen"	3	10823	0.874444534
544	European Journal of Entomology	3	10826	0.874686919
545	Exothermae Magazine	3	10829	0.874929304
546	Fabreries	3	10832	0.875171689
547	Fauna of New Zealand	3	10835	0.875414074
548	Folia Entomologica Mexicana	3	10838	0.87565646
549	Forhandlinger i Videnskab-Selskabets i Christiania	3	10841	0.875898845
550	Fragmenta Faunistica Hungarica	3	10844	0.87614123
551	Gayana	3	10847	0.876383615
552	Geobios new Reports	3	10850	0.876626
553	Harley Books	3	10853	0.876868385
554	Haryana Agricultural University Journal of Research	3	10856	0.87711077
555	Invertebrate Biology	3	10859	0.877353155
556	Izwestia Biologitschieskogo naoutschno-Issliedowatielskogo Institouta pri Permskom Ouniwersitete	3	10862	0.87759554
557	Journal of Anhui Normal University	3	10865	0.877837925
558	Journal of Asia-Pacific Entomology	3	10868	0.87808031
559	Journal of Hebei University, Natural Sciences	3	10871	0.878322695
560	Journal of Hunan Normal University	3	10874	0.87856508
561	Journal of Insect behaviour	3	10877	0.878807465
562	Journal of the Agricultural University Hebei	3	10880	0.879049851
563	Journal of the Assam Science Society	3	10883	0.879292236
564	Journal of the Federated Malay States Museums	3	10886	0.879534621
565	Journal of the Guangxi Agricultural College	3	10889	0.879777006
566	Journal of the Kansas Entomological Society	3	10892	0.880019391
567	Journal of the Zoological Society of India	3	10895	0.880261776
568	Korean Journal of Applied Entomology	3	10898	0.880504161
569	Korean Journal of Biological Sciences	3	10901	0.880746546
570	Levende Natuur	3	10904	0.880988931
571	Mémoires de la Société Royal Belge d'Entomologie	3	10907	0.881231316
572	Memoirs of the Zoological Survey of India	3	10910	0.881473701
573	Mitteilungen aus dem Museum für Naturkunde in Berlin, Zoologische Reihe	3	10913	0.881716086
574	Mygalomorph	3	10916	0.881958471
575	National Taiwan Normal University	3	10919	0.882200856
576	Natural Enemies of Insects	3	10922	0.882443241
577	Natural History Bulletin of the Siam Society	3	10925	0.882685627
578	Nieuwsbrief Spined	3	10928	0.882928012
579	North-Western Journal of Zoology	3	10931	0.883170397
580	Notas del Museo de la Plata	3	10934	0.883412782
581	Notes of the Arachnologists of the Southwest	3	10937	0.883655167
582	Nova Acta Regiae Societatis Scientiarum Upsaliensis	3	10940	0.883897552
583	Ocrotirea naturii ?i mediului inconjurator, Bucure?ti	3	10943	0.884139937
584	Pacific Insects Monographs	3	10946	0.884382322
585	Papéis Avulsos de Zoologia, Sao Paolo	3	10949	0.884624707
586	Plant Protection Institute & Berzsenyi College	3	10952	0.884867092
587	Polish Journal of Entomology	3	10955	0.885109477
588	Proceedings of the Boston Society of Natural History	3	10958	0.885351862
589	Records of the Auckland Institute and Museum	3	10961	0.885594247
590	Revista Chilena de Entomología	3	10964	0.885836632
591	Revista da Sociedade Brasileira de Sciencias	3	10967	0.886079018
592	Revista de Biología Tropical	3	10970	0.886321403
593	Revista Peruana de Biología	3	10973	0.886563788
594	Revista Peruana de Entomología Agricola	3	10976	0.886806173
595	Revue Zoologique par la Société Cuviérienne	3	10979	0.887048558
596	Sborník Klubu P?írodov?deckého v Brn?	3	10982	0.887290943
597	Sibirskij Biologichesky Zhurnal	3	10985	0.887533328
598	Sitzungsberichte der Kaiserlichen Akademie der Wissenschaften, Mathematisch-naturwissenschaftliche Klasse, Wien	3	10988	0.887775713
599	Sociedad Entomológica Argentina	3	10991	0.888018098
600	Special Bulletin of the Japanese Society of Coleopterology	3	10994	0.888260483
601	Steenstrupia	3	10997	0.888502868
602	Systematic Entomology	3	11000	0.888745253
603	Systematic Zoology	3	11003	0.888987638
604	Tangdu Journal	3	11006	0.889230023
605	Technische Universität Berlin Dokumentation Kongresse und Tagungen	3	11009	0.889472408
606	The Southwestern Naturalist	3	11012	0.889714794
607	The Victorian Naturalist	3	11015	0.889957179
608	The Western Australian Naturalist	3	11018	0.890199564
609	The Zoological Journal	3	11021	0.890441949
610	Theses Collection of the Graduate School of Education of Kyungpook National University	3	11024	0.890684334
611	Transactions of the Kansas Academy of Science	3	11027	0.890926719
612	Transactions of the Royal Society of South Australia	3	11030	0.891169104
613	Transactions of the South African Philosophical Society	3	11033	0.891411489
614	USSR Academy of Sciences, Institute of Biological Problems of the North	3	11036	0.891653874
615	Vasculum	3	11039	0.891896259
616	Zeitschrift des Ferdinandeums für Tirol und Vorarlberg	3	11042	0.892138644
617	Zeitschrift für Angewandte Zoologie	3	11045	0.892381029
618	Zeitschrift für Naturwissenschaften	3	11048	0.892623414
619	Zoological Science	3	11051	0.892865799
620	Zoologist	3	11054	0.893108185
621	Abhandlungen und Berichte des Naturkundlichen Museums "Mauritianum", Altenburg	2	11056	0.893269775
622	Abhandlungen und Verhandlungen des Naturwissenschaftlichen Vereins in Hamburg	2	11058	0.893431365
623	Acta Arachnologica	2	11060	0.893592955
624	Acta Palaeontologica Polonica	2	11062	0.893754545
625	Acta Scientiarum Naturalium Universitatis Intramongolicae	2	11064	0.893916135
626	Acta Zoologica Cracoviensia	2	11066	0.894077725
627	Acta Zoologica Lituanica	2	11068	0.894239315
628	Acta Zoologica Mexicana	2	11070	0.894400905
629	Acta Zoólogica Mexicana (n. s.)	2	11072	0.894562495
630	Acta Zoologica Taiwanica	2	11074	0.894724085
631	Acta, Pontificia Academia Scientiarum	2	11076	0.894885675
632	Agricultural Insects, Spiders, Plant Diseases and Weeds of Xizang	2	11078	0.895047265
633	Akademii Nauk SSSR	2	11080	0.895208855
634	Akitu	2	11082	0.895370445
635	American Arachnological Society	2	11084	0.895532035
636	Analele Universitatii Bucuresti Seria Stiintele naturii, Biologie	2	11086	0.895693625
637	Anales de Agricultura de la República Argentina	2	11088	0.895855215
638	Anales de Biologia, Universidad de Murcia	2	11090	0.896016805
639	Anales de la Sociedad Científica Argentina	2	11092	0.896178395
640	Anales del Museo de Historia Natural de Valparai?so	2	11094	0.896339985
641	Annalen Zoologische Wetenschappen	2	11096	0.896501576
642	Annales Academiæ Scientiarum Fennicae	2	11098	0.896663166
643	Annales de la Société Royal de Zoologie de Belgique	2	11100	0.896824756
644	Annales du Musée Royal d'Histoire Naturelle de Belgique	2	11102	0.896986346
645	Annales Entomologici Fennici	2	11104	0.897147936
646	Annals of the New York Academy of Science	2	11106	0.897309526
647	Annals of the Queensland Museum	2	11108	0.897471116
648	Annual Report of the Geological Survey of Indiana	2	11110	0.897632706
649	Annuario dell'Istituto e Museo di Zoologia dell'Universita di Napoli	2	11112	0.897794296
650	Aquilo	2	11114	0.897955886
651	Arachnological Society of Japan	2	11116	0.898117476
652	Aracnologia	2	11118	0.898279066
653	Archivos do Instituto Vital Brazil	2	11120	0.898440656
654	Arthropod Structure & Development	2	11122	0.898602246
655	Atti del Reale Istituto Veneto di Scienze, Lettere ed Arti	2	11124	0.898763836
656	Atti della Reale Accademia delle Scienze Fisiche e Matematiche di Napoli	2	11126	0.898925426
657	Atti della Societa Italiana di Scienze Naturali e del Museo Civico di Storia Naturale di Milano	2	11128	0.899087016
658	Atti dell'Accademia Scientifica Veneto-Trentino-Istriana	2	11130	0.899248606
659	Australian Entomological Society Miscellaneous Publication	2	11132	0.899410196
660	Beaufortia	2	11134	0.899571786
661	Beiträge zur Naturkundlichen Forschung in Südwestdeutschland	2	11136	0.899733376
662	Bergens Museums Aarbok	2	11138	0.899894966
663	Biologia (Bratislava)	2	11140	0.900056557
664	Biologia Bratislawa	2	11142	0.900218147
665	Biologia Gallo-Hellenica	2	11144	0.900379737
666	Biological Bulletin of the National Taiwan Normal University	2	11146	0.900541327
667	Biological Journal of the Linnean Society	2	11148	0.900702917
668	Bionature	2	11150	0.900864507
669	Biosystematica	2	11152	0.901026097
670	Boletim de Zoologia	2	11154	0.901187687
671	Boletín de Biodiversidad de Chile	2	11156	0.901349277
672	Boletin de la Academia Nacional de Ciencias en Córdoba	2	11158	0.901510867
673	Bollettino del Laboratorio di Zoologia Generale e Agraria della R. Scuola Superiore d'Agricoltura in Portici	2	11160	0.901672457
674	Bollettino dell'Associazione Romana di Entomologia	2	11162	0.901834047
675	Bollettino delle sedute della Accademia Gioenia di Scienze Naturali in Catania	2	11164	0.901995637
676	Bollettino di Zoologia	2	11166	0.902157227
677	Bollettino Scientifico, Pavia	2	11168	0.902318817
678	Bulletin de la Société d'Études des Sciences Naturelles du Vaucluse	2	11170	0.902480407
679	Bulletin de la Société d'histoire Naturelle du Département de la Moselle	2	11172	0.902641997
680	Bulletin de la Société Européenne d'Arachnologie	2	11174	0.902803587
681	Bulletin de la Société Fouad 1<sup>er</sup> d'Entomologie	2	11176	0.902965177
682	Bulletin de la Société Linnéenne de Provence	2	11178	0.903126767
683	Bulletin de l'Académie impériale des sciences de St.-Pétersbourg	2	11180	0.903288357
684	Bulletin of the Brooklyn Institute of Arts and Sciences	2	11182	0.903449947
685	Bulletin of the Connecticut State Geological and Natural History Survey	2	11184	0.903611538
686	Bulletin of the Gunma Biological Education Society	2	11186	0.903773128
687	Bulletin of the Higashi Taisetsu Museum of Natural History	2	11188	0.903934718
688	Bulletin of the Liverpool Museum	2	11190	0.904096308
689	Bulletin of the U. S. Geological Survey	2	11192	0.904257898
690	Bulletin of the Wisconsin Natural History Society	2	11194	0.904419488
691	Bulletin, Agricultural Experiment Station, University of Arkansas	2	11196	0.904581078
692	Calodema Supplementary Paper	2	11198	0.904742668
693	Caribbean Journal of Science	2	11200	0.904904258
694	?asopis Moravského Zemského Musea, Brno	2	11202	0.905065848
695	Centre for Entomological Studies Ankara, Miscellaneous Papers	2	11204	0.905227438
696	Chicago Academy of Sciences, Natural History Miscellanea	2	11206	0.905389028
697	China Forestry Publishing House	2	11208	0.905550618
698	Chiron Publications	2	11210	0.905712208
699	Comptes Rendus de l'Académie des Sciences Paris	2	11212	0.905873798
700	Comptes Rendus Hebdomadaires des Séances de l'Académie des Sciences Paris	2	11214	0.906035388
701	Danmarks Fauna	2	11216	0.906196978
702	Denkschriften der Medizinisch-Naturwissenschaftlichen Gesellschaft zu Jena	2	11218	0.906358568
703	Deutsche Entomologische Zeitschrift, Neue Folge	2	11220	0.906520158
704	Encyclopédie Méthodique, Histoire Naturelle, Insectes, Paris	2	11222	0.906681748
705	Entomologica Romanica	2	11224	0.906843338
706	Entomological Problems	2	11226	0.907004928
707	Entomologische Nachrichten und Berichte	2	11228	0.907166519
708	Entomologist	2	11230	0.907328109
709	Entomology Memoir, Department of Agriculture Republic of South Africa	2	11232	0.907489699
710	Ergebnisse des Forschungsunternehmens Nepal Himalaya	2	11234	0.907651289
711	Essays and Studies Published in Commemoration of the 10th Anniversary of Otemon Gakuin University	2	11236	0.907812879
712	Evolution	2	11238	0.907974469
713	Exothermae	2	11240	0.908136059
714	Extra, Museo Argentino de Ciencias Naturales, Nueva Serie	2	11242	0.908297649
715	Fabreries, Supplement	2	11244	0.908459239
716	Fauna & Flora	2	11246	0.908620829
717	Fauna hipogea y hemiedáfica de Venezuela y de otros paises de América del Sur	2	11248	0.908782419
718	Fauna Hungariae	2	11250	0.908944009
719	Fauna Norvegica	2	11252	0.909105599
720	Faune Madagascar	2	11254	0.909267189
721	Feuille des Jeunes Naturalistes	2	11256	0.909428779
722	Field and Laboratory (Dallas)	2	11258	0.909590369
723	Folia Clinica et Biologica, Piracicaba, Sao Paulo	2	11260	0.909751959
724	Folia Musei Historico-Naturalis Bakonyiensis	2	11262	0.909913549
725	Genetica	2	11264	0.910075139
726	Gewässer Abwässer	2	11266	0.910236729
727	Gortania, Atti del Museo Friulano di Storia Naturale	2	11268	0.910398319
728	Graellsia	2	11270	0.91055991
729	Harper's New Monthly Magazine	2	11272	0.9107215
730	Hebei University of Science and Techology Publishing House	2	11274	0.91088309
731	Historia Naturalis Bulgarica	2	11276	0.91104468
732	Hoikusha	2	11278	0.91120627
733	Hokuryukan	2	11280	0.91136786
734	Hokuryukan Co.	2	11282	0.91152945
735	Indo-Malayan Zoology	2	11284	0.91169104
736	Industrialist	2	11286	0.91185263
737	Insect Systematics & Evolution, Supplement	2	11288	0.91201422
738	Insektuto, Konch?aik?kai	2	11290	0.91217581
739	Integrative Bioscience	2	11292	0.9123374
740	International Journal of Agricultural Biology	2	11294	0.91249899
741	International Scholarly Research Network Zoology	2	11296	0.91266058
742	Internationale Entomologische Zeitschrift, Guben	2	11298	0.91282217
743	Irish Naturalist	2	11300	0.91298376
744	Israel Academy of Sciences and Humanities	2	11302	0.91314535
745	Jahrbuch des Naturhistorischen Museums Bern	2	11304	0.91330694
746	Journal of Entomology and Zoology Studies	2	11306	0.91346853
747	Journal of Hangzhou University, Natural Science Edition	2	11308	0.91363012
748	Journal of Hebei Normal University, Natural Sciences	2	11310	0.91379171
749	Journal of Hebei University	2	11312	0.9139533
750	Journal of Hunan Normal University, Natural Sciences	2	11314	0.914114891
751	Journal of Inner Mongolia Normal University, Natural Science Edition	2	11316	0.914276481
752	Journal of Liaoning Forestry Science and Technology	2	11318	0.914438071
753	Journal of Northeast Normal University	2	11320	0.914599661
754	Journal of Shanxi University, Natural Sciences	2	11322	0.914761251
755	Journal of the Entomological Society of Ontario	2	11324	0.914922841
756	Journal of the Faculty of Science, Hokkaido University, Series 6, Zoology	2	11326	0.915084431
757	Journal of the Fujian Agricultural College	2	11328	0.915246021
758	Journal of the Liaoning Normal University, Natural Science Edition	2	11330	0.915407611
759	Journal of the Liaoning University	2	11332	0.915569201
760	Journal of the Malaysian Branch of the Royal Asiatic Society	2	11334	0.915730791
761	Journal of the University of Poona	2	11336	0.915892381
762	Journal of the Xinjiang August 1<sup>st</sup> Agricultural College	2	11338	0.916053971
763	Journal of Tokyo University for General Education	2	11340	0.916215561
764	Journal of Tokyo University for General Education, Natural Sciences	2	11342	0.916377151
765	Journal of Xinjiang University	2	11344	0.916538741
766	Journal of Yunan Normal University	2	11346	0.916700331
767	Koedoe	2	11348	0.916861921
768	Korean Journal of Entomology	2	11350	0.917023511
769	Korean Journal of Environmental Biology	2	11352	0.917185101
770	Korrespondenz-Blatt des Zoologisch-Mineralogischen Vereins in Regensburg	2	11354	0.917346691
771	Kungliga Fysiografiska Sällskapets i Lund Förhandlingar (Proceedings of the Royal Physiographic Society at Lund)	2	11356	0.917508281
772	Kyo-Hak Publishing Co.	2	11358	0.917669872
773	La Animala Mondo	2	11360	0.917831462
774	Latvijas Entomologs	2	11362	0.917993052
775	Lavori della Società Veneziana di Scienze Naturali	2	11364	0.918154642
776	Le Naturaliste Canadien	2	11366	0.918316232
777	Literary Department Review, Otemon Gakuin University, Osaka	2	11368	0.918477822
778	Lundiana	2	11370	0.918639412
779	Malayan Nature Journal	2	11372	0.918801002
780	Manchester University Press	2	11374	0.918962592
781	Mauritiana (Altenburg)	2	11376	0.919124182
782	Meddr Gr&oslash;nland	2	11378	0.919285772
783	Mémoires de la Société Royale des Sciences de Liège	2	11380	0.919447362
784	Memoirs of the Education Institute for Private Schools in Japan, Hachioji-shi, Tokyo	2	11382	0.919608952
785	Memoirs of the Entomological Society of Canada	2	11384	0.919770542
786	Memoirs of the Queensland Museum, Nature	2	11386	0.919932132
787	Memoria de la Fundación La Salle de Ciencias Naturales	2	11388	0.920093722
788	Memorias de la Real Sociedad Española de Historia Natural	2	11390	0.920255312
789	Memorias e Estudos do Museu Zoologico da Universidade de Coimbra	2	11392	0.920416902
790	Memorie di Biogeografia Adriatica	2	11394	0.920578492
791	Miscellanea Zoologica Sumatrana	2	11396	0.920740082
792	Miscellaneous Reports of the Hiwa Museum for Natural History, Hiroshima	2	11398	0.920901672
793	Miscellaneous Reports of the Research Institute for Natural Resources Tokyo	2	11400	0.921063263
794	Mission Zoologique Belge aux Îles Galapagos et en Ecuador (N. et J. Leleup, 1964–1965), Résultats Scientifiques	2	11402	0.921224853
795	Mitteilungen aus den Königlichen Naturwissenschaftlichen Instituten in Sofia	2	11404	0.921386443
796	Mitteilungen der Naturforschenden Gesellschaft Schaffhausen	2	11406	0.921548033
797	Mitteilungen des Internationalen Entomologischen Vereins	2	11408	0.921709623
798	Mitteilungen des Naturwissenschaftlichen Vereines für Steiermark	2	11410	0.921871213
799	Mittheilungen des Münchener Entomologischen Vereins	2	11412	0.922032803
800	Museum Paper, Alabama Museum of Natural History	2	11414	0.922194393
801	Museum Paper, Geological Survey of Alabama	2	11416	0.922355983
802	Museum Senckenbergianum, Abhandlungen aus dem Gebiete der beschreibenden Naturgeschichte	2	11418	0.922517573
803	Mushi	2	11420	0.922679163
804	Nature	2	11422	0.922840753
805	Naturwissenschaftliche Wochenschrift	2	11424	0.923002343
806	Natuurhistorisch Maandblad	2	11426	0.923163933
807	Nauchnye Doklady Vysshe? Shkoly, Biologicheskie Nauki	2	11428	0.923325523
808	Nauka Publisher	2	11430	0.923487113
809	Nemouria, Occasional Papers of the Delaware Museum of Natural History	2	11432	0.923648703
810	Neotrópica	2	11434	0.923810293
811	Neues Jahrbuch für Geologie und Paläontologie, Abhandlungen	2	11436	0.923971883
812	Open Journal of Animal Sciences	2	11438	0.924133473
813	Orsis	2	11440	0.924295063
814	Orthobula's Box	2	11442	0.924456653
815	Otemon Bulletin for the Australian Studies	2	11444	0.924618244
816	Otemon Gakuin University	2	11446	0.924779834
817	Palaeontology	2	11448	0.924941424
818	Pamietnik Akademji umiejetnosci w Krakow wydzial matematyczno-przyrodniczy	2	11450	0.925103014
819	Philosophical Transactions of the Royal Society of London	2	11452	0.925264604
820	Plant Protection Research Institute Handbook	2	11454	0.925426194
821	Proceedings of the Koninklijke Nederlandse Akademie van Wetenschappen	2	11456	0.925587784
822	Proceedings of the Natural History Society of Wisconsin	2	11458	0.925749374
823	Proceedings of the Royal Irish Academy	2	11460	0.925910964
824	Proceedings of the Royal Society B, Biological Sciences	2	11462	0.926072554
825	Proceedings of the Washington Academy of Sciences	2	11464	0.926234144
826	Publicaciones de la Misión de Estudios de Patologia Regional Argentina, Jujuy	2	11466	0.926395734
827	Publicações Avulsas do Museu Nacional, Rio de Janeiro	2	11468	0.926557324
828	Quaderni del Museo di Speleologia "V. Rivera"	2	11470	0.926718914
829	Revista Nordestina de Biologia	2	11472	0.926880504
830	Revista Paraguaya de Microbiología	2	11474	0.927042094
831	Revue Valdôtaine d'Histoire Naturelle	2	11476	0.927203684
832	Romanian Journal of Biology - Zoology	2	11478	0.927365274
833	Sapiens. Revista Universitaria de Investigación	2	11480	0.927526864
834	Sborník Entomologického Odd?lení Národního Musea v Praze	2	11482	0.927688454
835	Sborník Jiho?eského Muzea v ?eských Bud?jovicích P?írodní V?dy	2	11484	0.927850044
836	Schriften des Naturwissenschaftlichen Vereins für Schleswig-Holstein	2	11486	0.928011634
837	Science Bulletin of the Faculty of Liberal Arts and Education, Nagasaki University	2	11488	0.928173225
838	Scientia	2	11490	0.928334815
839	Serie Investigación, Instituto de Animales Venenosos "Dr. Jorge W. Abalos"	2	11492	0.928496405
840	Silliman's Journal of Science and Arts	2	11494	0.928657995
841	Siri Scientific Press	2	11496	0.928819585
842	Slovenska Akademija Znanosti in Umetnosti, Razred za Prirodoslovne Vede, Classis IV, Historia Naturalis	2	11498	0.928981175
843	South of Russia: Ecology, Development	2	11500	0.929142765
844	Species Diversity	2	11502	0.929304355
845	Suomalaisen Eläin-ja Kasvitieteellisen Seuran Vanamon Tiedonannot (Archivum Societatis Zoologicae Botanicae Fennicae "Vanamo")	2	11504	0.929465945
846	Systematic Biology	2	11506	0.929627535
847	Systematics and Biodiversity	2	11508	0.929789125
848	Természtrajzi Füzetek	2	11510	0.929950715
849	The Canadian Field-Naturalist	2	11512	0.930112305
850	The Philippine Agricultural Scientist	2	11514	0.930273895
851	The Philippine Journal of Science	2	11516	0.930435485
852	Transactions of the American Entomological Society	2	11518	0.930597075
853	Transactions of the Linnean Society of London, Zoology	2	11520	0.930758665
854	Transactions of the Natural History Society of Formosa	2	11522	0.930920255
855	Transactions of the New York State Agricultural Society	2	11524	0.931081845
856	Treubia	2	11526	0.931243435
857	University of Michigan Press	2	11528	0.931405025
858	Verhandlungen der Deutschen Zoologischen Gesellschaft	2	11530	0.931566615
859	Verhandlungen des Naturwissenschaftlichen Vereins in Hamburg, Neue Folge	2	11532	0.931728206
860	Veröffentlichungen aus dem Deutschen Kolonial- und Übersee-Museum Bremen	2	11534	0.931889796
861	Vestnik Leningradskogo Universiteta	2	11536	0.932051386
862	Videnskabelige Meddelelser fra Dansk Naturhistorisk Forening i Kjøbenhavn	2	11538	0.932212976
863	Videnskabelige Meddelelser fra den Naturhistoriske Forening i Kjøbenhavn	2	11540	0.932374566
864	Wykaz Szkoly Glownej Warszawskiego	2	11542	0.932536156
865	Zapateri, Revista Aragonesa de Entomología	2	11544	0.932697746
866	Zeitschrift für Entomologie, Breslau	2	11546	0.932859336
867	Zeitschrift für Morphologie der Tiere	2	11548	0.933020926
868	Zeitschrift für Wissenschaftliche Zoologie	2	11550	0.933182516
869	Zeitschrift für Zoologische Systematik und Evolutionsforschung	2	11552	0.933344106
870	Zeszyty Naukowe Uniwersytetu Szczeci?skiego, Acta Biologica	2	11554	0.933505696
871	Zoologia	2	11556	0.933667286
872	Zoological Catalogue of Australia	2	11558	0.933828876
873	Zoologie	2	11560	0.933990466
874	Zoologisches Zentralblatt	2	11562	0.934152056
875	Zoosystematica Rossica	2	11564	0.934313646
876	Zoosystematics and Evolution	2	11566	0.934475236
877	<i>Gosho-zan</i>. Scientific Research Association of Yamagata Prefecture, Japan	1	11567	0.934556031
878	2. Zoology	1	11568	0.934636826
879	A Nyme Savaria Egyetemi Központ Tudományos Közleményei XIX. Természettudományok	1	11569	0.934717621
880	A Nyme Savaria Egyetemi Központ Tudományos Közleményei XVI. Természettudományok	1	11570	0.934798416
881	A NYME Savaria Egyetemi Központ Tudományos Közleményei, Szombathely XVII. Természettudományok	1	11571	0.934879211
882	A. Ziemsen	1	11572	0.934960006
883	Abhandlungen der Zoologisch-Botanischen Gesellschaft in Wien	1	11573	0.935040801
884	Abhandlungen und Berichte des Königlich-Zoologischen und Anthropologisch-Ethnografischen Museums zu Dresden	1	11574	0.935121597
885	Abhandlungen und Berichte des Museums der Natur Gotha	1	11575	0.935202392
886	Academia Praha	1	11576	0.935283187
887	Academia Republicii Socialiste România	1	11577	0.935363982
888	Academic Journal of Konkuk University	1	11578	0.935444777
889	Academic Press	1	11579	0.935525572
890	Academie des Sciences l’URSS, Filiale Georgienne, Section de Zoologie	1	11580	0.935606367
891	Acta Agriculturae Universitatis Jiangxiensis	1	11581	0.935687162
892	Acta Biologica Universitatis Daugavpiliensis	1	11582	0.935767957
893	Acta Botanica Yunnanica, Supplement	1	11583	0.935848752
894	Acta ent bohemoslavaca	1	11584	0.935929547
895	Acta Entomologica Chilena	1	11585	0.936010342
896	Acta Phytopathologica et Entomologica Hungarica	1	11586	0.936091137
897	Acta pro Fauna et Flora Universali, Seria I, Zoologia	1	11587	0.936171932
898	Acta Societatis pro Fauna et Flora Fennica	1	11588	0.936252727
899	Acta Societatis Scientiarum Indica-Neerlandica	1	11589	0.936333522
900	Acta Societatis Scientiarum Naturalium Moraviae	1	11590	0.936414317
901	Acta Universitatis Latviensis	1	11591	0.936495112
902	Acta Universitatis Purkynianae Studia Biologica	1	11592	0.936575907
903	Actas de las Jornadas de la Asociación Española de Entomología, Sevilla	1	11593	0.936656702
904	Actas de las Jornadas de Zoología del Uruguay	1	11594	0.936737497
905	Actas y Memories des Primer Congreso de Naturalistas Espanoles	1	11595	0.936818292
906	Actas y Trabajos del Congreso Sudamericano de Zoologia, La Plata	1	11596	0.936899087
907	Actes de la Société Scientifique du Chilie	1	11597	0.936979882
908	Agriculture Planning Committee of Shanxi Province	1	11598	0.937060677
909	Agriculture Publishing House	1	11599	0.937141472
910	Agropromizat	1	11600	0.937222267
911	Akad. Nauk Kirghiz. SSR	1	11601	0.937303062
912	Akademia Nauk	1	11602	0.937383857
913	Akademiai Kiadó	1	11603	0.937464652
914	Akademii Naouk Soiouza Trudy Kazachstanskogo Filiala	1	11604	0.937545447
915	Albrecht Philler Verlag	1	11605	0.937626242
916	Állatani Közlemények	1	11606	0.937707037
917	Állattani Közlemények	1	11607	0.937787832
918	American Museum Journal	1	11608	0.937868627
919	American Zoologist	1	11609	0.937949422
920	Anadolu Doga Bilimleri Dergisi	1	11610	0.938030217
921	Anadolu University Journal of Science and Technology, C	1	11611	0.938111012
922	Analele ?tiin?ifice Ale Universit??ii "Al. I. Cuza" Din Ia?i, Biologie animal?	1	11612	0.938191807
923	Anales del Instituto Biológico de la Universidad Nacional Autónoma de México, Serie Zoologia	1	11613	0.938272602
924	Anales del Instituto de Medicina Regional Univercidad Nacional de Tucuman	1	11614	0.938353397
925	Anales del Instituto Fisico-Geografico y del Museo Nacional de Costa-Rica	1	11615	0.938434192
926	Anales del Museo Argentino de Ciencias Naturales	1	11616	0.938514987
927	Anartia	1	11617	0.938595782
928	Animal Science and Veterinary Medicine	1	11618	0.938676578
929	Ann. Rep. JIBP/CT-S	1	11619	0.938757373
930	Annaes des Sciencias Naturaes, Porto	1	11620	0.938838168
931	Annalen des Kaiserlich-Königlichen Naturhistorischen Hofmuseums in Wien	1	11621	0.938918963
932	Annales Scientifiques de l'Université de Jassy	1	11622	0.938999758
933	Annales Universitatis Mariae Curie-Sk?odowska, Lublin-Polonia	1	11623	0.939080553
934	Annales Universitatis Scientiarum Budapestinensis	1	11624	0.939161348
935	Annales Universitatis Scientiarum Budapestinensis de Rolando Eötvös	1	11625	0.939242143
936	Annales Zoologici Musei Polonici Historiae Naturalis	1	11626	0.939322938
937	Annals of Entomology, Dehradun	1	11627	0.939403733
938	Annals of Natural History	1	11628	0.939484528
939	Annals of Scottish Natural History	1	11629	0.939565323
940	Annals of the Ditsong National Museum of Natural History	1	11630	0.939646118
941	Annotationes Zoologicae et Botanicae Bratislava	1	11631	0.939726913
942	Annual Report and Proceedings of the Chester Society of Natural Science, Literature and Art	1	11632	0.939807708
943	Annual Report of the Japanese Committee of the International Biological Program/CT-S for the Fiscal Year of 1968	1	11633	0.939888503
944	Annual Report of the Otemon Gakuin University	1	11634	0.939969298
945	Annuario della Società dei Naturalisti in Modena	1	11635	0.940050093
946	Annuario Zoologico	1	11636	0.940130888
947	Anzeiger für Schädlingskunde, Pflanzenschutz, Umweltschutz	1	11637	0.940211683
948	Arachne	1	11638	0.940292478
949	Arachnida (Schweiz)	1	11639	0.940373273
950	Arachnologische Magazin	1	11640	0.940454068
951	Archiv für die Naturkunde Liv-, Ehst- und Kurlands	1	11641	0.940534863
952	Archiv für die Naturwissenschaftliche Landesdurchforschung von Böhmen	1	11642	0.940615658
953	Archiv für Hydrobiologie	1	11643	0.940696453
954	Archiv Svazu na Výzkum a Ochranu P?írody i Krajiny v Zemi Moravskoslezské	1	11644	0.940777248
955	Archives Entomologiques de M. J. Thomson	1	11645	0.940858043
956	Archivi per la Zoologia Anatomia e Fisiologia Bologna	1	11646	0.940938838
957	Armadillo Papers	1	11647	0.941019633
958	Arquivos de Higiene e Saúde Pública	1	11648	0.941100428
959	Arquivos de Zoologia	1	11649	0.941181223
960	Arquivos do Instituto Biológico, Sao Paolo	1	11650	0.941262018
961	Arquivos do Museu Bocage	1	11651	0.941342813
962	Arquivos do Museu Paranaense	1	11652	0.941423608
963	Ashkhabad	1	11653	0.941504403
964	Atas do Simposio sobre a Biota Amazonica	1	11654	0.941585198
965	Atti della Reale Accademia d'Italia	1	11655	0.941665993
966	Atti della Societa dei Naturalisti di Modena	1	11656	0.941746788
967	Atti XIII Congresso Nazionale Italiano di Entomologia, Sestriere-Torino	1	11657	0.941827583
968	Aufsätze und Reden der Senckenbergischen Naturforschenden Gesellschaft	1	11658	0.941908378
969	Aula y Ambiente	1	11659	0.941989173
970	Australian Geographic Society Reports	1	11660	0.942069968
971	Australian Museum	1	11661	0.942150764
972	Australian Museum Memoirs	1	11662	0.942231559
973	Author's publication	1	11663	0.942312354
974	Avhandlinger utgitt av det Norske Videnskaps-Akademi i Oslo	1	11664	0.942393149
975	Badania Fizjograficzne nad Polsk? Zachodni?	1	11665	0.942473944
976	Baika Literary Bulletin	1	11666	0.942554739
977	Banisteria	1	11667	0.942635534
978	Barlangkutatás (Budapest)	1	11668	0.942716329
979	Behavioral Ecology	1	11669	0.942797124
980	Behavioral Ecology and Sociobiology	1	11670	0.942877919
981	Beiträge zur Entomofaunistik	1	11671	0.942958714
982	Beiträge zur Entomologie	1	11672	0.943039509
983	Berichte der Biologischen Süßwasserstation der Kaiserlichen Naturforschergesellschaft zu St. Petersburg	1	11673	0.943120304
984	Berichte der Naturforschenden Gesellschaft zu Freiburg im Breisgau	1	11674	0.943201099
985	Berichte der Senckenbergischen Naturforschenden Gesellschaft	1	11675	0.943281894
986	Berichte und Tätigkeiten der Entomologischen Sektion Breslau	1	11676	0.943362689
987	Berolini, Mollusca C.	1	11677	0.943443484
988	Bertrand	1	11678	0.943524279
989	Bibliotheca Zoologica	1	11679	0.943605074
990	Bijdragen tot de Dierkunde	1	11680	0.943685869
991	Biodiversity Data Journal	1	11681	0.943766664
992	Biodiversity Journal	1	11682	0.943847459
993	Biogeographica	1	11683	0.943928254
994	Biogeography	1	11684	0.944009049
995	Biologia (Pakistan)	1	11685	0.944089844
996	Biologica Nyssana	1	11686	0.944170639
997	Biological Diversity & Conservation	1	11687	0.944251434
998	Biological Magazine Okinawa	1	11688	0.944332229
999	Biologie in unserer Zeit	1	11689	0.944413024
1000	BioScriba	1	11690	0.944493819
1001	Biosphaera, Tokyo	1	11691	0.944574614
1002	Biosystematics and Ecology Series	1	11692	0.944655409
1003	Biotropica	1	11693	0.944736204
1004	Bishop Museum Occasional Papers	1	11694	0.944816999
1005	BMC Ecology	1	11695	0.944897794
1006	Bohemia Centralis	1	11696	0.944978589
1007	Boletim da Sociedade Entomológica do Brasil	1	11697	0.945059384
1008	Boletim da Sociedade Portuguesa de Entomologia	1	11698	0.945140179
1009	Boletim da Sociedade Portuguesa de Entomologia, Suplemento	1	11699	0.945220974
1010	Boletim de Indústria Animal Sao Paulo	1	11700	0.945301769
1011	Boletim do Museu Nacional do Rio de Janeiro, Nova Serie, Zoologia	1	11701	0.945382564
1012	Boletim do Museu Paraense Emílio Goeldi	1	11702	0.945463359
1013	Boletin Biologico Rio de Janeiro	1	11703	0.945544154
1014	Boletin Chileno de Parasitologia	1	11704	0.94562495
1015	Boletin de la Academia de Ciencias Fisicas, Matematicas y Naturales, Caracas	1	11705	0.945705745
1016	Boletin de la Real Sociedad Espanola de Historia Natural	1	11706	0.94578654
1017	Boletín de la Real Sociedad Española de Historia Natural	1	11707	0.945867335
1018	Boletín de la Sociedad de Historia Natural de Baleares	1	11708	0.94594813
1019	Boletin del Centro de Investigaciones Biologicas de la Universidad del Zulia	1	11709	0.946028925
1020	Boletín del Museo Nacional de Chile	1	11710	0.94610972
1021	Bollettino dei Musei e degli Istituti Biologici della Reale Universit? di Genova	1	11711	0.946190515
1022	Bollettino della Società dei Naturalisti in Napoli	1	11712	0.94627131
1023	Bollettino della Società Eustachiana	1	11713	0.946352105
1024	Bollettino della Sociétà Veneziana di Storia Naturale e del Museo Civico di Storia Naturale, Venezia	1	11714	0.9464329
1025	Bollettino della Società Zoologica Italiana	1	11715	0.946513695
1026	Bonner Zoologische Monographien	1	11716	0.94659449
1027	Bornemann	1	11717	0.946675285
1028	Brill	1	11718	0.94675608
1029	British Antarctic ("Terra Nova") Expedition, 1910, Natural History Reports, Zoology	1	11719	0.946836875
1030	British Arachnological Society	1	11720	0.94691767
1031	British Naturalist, Supplement	1	11721	0.946998465
1032	Buenos Aires, Zoología	1	11722	0.94707926
1033	Buletin Stiintific. Sectia de Biologic si Stiinte Agricole	1	11723	0.947160055
1034	Bull. Mus. natn. Hist. nat. Par	1	11724	0.94724085
1035	Bulletin - Zoological Society of Egypt	1	11725	0.947321645
1036	Bulletin de Association Nationale des Professeurs de Biologie de Belgique	1	11726	0.94740244
1037	Bulletin de l’Institut des Recherches Biologiques, Molotov	1	11727	0.947483235
1038	Bulletin de la Societé des Sciences de Bucarest	1	11728	0.94756403
1039	Bulletin de la Société Entomologique d'Egypte	1	11729	0.947644825
1040	Bulletin de la Société Linnéenne de Bordeaux	1	11730	0.94772562
1041	Bulletin de la Société Linnéenne de Normandie	1	11731	0.947806415
1042	Bulletin de la Société Nationale d'Acclimatation de France	1	11732	0.94788721
1043	Bulletin de la Société Neuchâteloise des Sciences Naturelles	1	11733	0.947968005
1044	Bulletin de la Société Vaudoise des Sciences Naturelles	1	11734	0.9480488
1045	Bulletin de l'Académie Royale des Sciences, des Lettres et des Beaux-Arts de Belgique	1	11735	0.948129595
1046	Bulletin des Institutions Royales d'Histoire Naturelle à Sophia	1	11736	0.94821039
1047	Bulletin des Sciences, par la Société Philomatique	1	11737	0.948291185
1048	Bulletin du Muséum de Géorgie	1	11738	0.94837198
1049	Bulletin of Hangzhou Normal College	1	11739	0.948452775
1050	Bulletin of Institute of Liberal Arts Otemon Gakuin University	1	11740	0.94853357
1051	Bulletin of the British Ecological Society	1	11741	0.948614365
1052	Bulletin of the Department of Zoology of the Panjab University	1	11742	0.94869516
1053	Bulletin of the Faculty of Agriculture, Yamaguchi University	1	11743	0.948775955
1054	Bulletin of the Hoshizaki Green Foundation	1	11744	0.94885675
1055	Bulletin of the Huizhou Normal College	1	11745	0.948937545
1056	Bulletin of the Madras Government Museum	1	11746	0.94901834
1057	Bulletin of the Raffles Museum Singapore	1	11747	0.949099135
1058	Bulletin of the Texas Memorial Museum	1	11748	0.949179931
1059	Bulletin of the Yamagata Prefectural Museum	1	11749	0.949260726
1060	Bulletin of the Zoological Museum of the University of Amsterdam	1	11750	0.949341521
1061	Bulletin Scientifique de la France et de la Belgique	1	11751	0.949422316
1062	Bulletin, Office National Anti-Acridien, Alger	1	11752	0.949503111
1063	Bulletin, Shadong University	1	11753	0.949583906
1064	Bulletin, United States National Museum	1	11754	0.949664701
1065	Burke Museum Contributions in Anthropology and Natural History	1	11755	0.949745496
1066	Buruatian Scientifica Centre Siberian Branch Russian Academy of Sciences Press	1	11756	0.949826291
1067	Byulleten Moskovskogo Obshchestva Ispytatelei Prirody	1	11757	0.949907086
1068	C.S.S.A.R.	1	11758	0.949987881
1069	CAB International	1	11759	0.950068676
1070	Calanus	1	11760	0.950149471
1071	Caldasia	1	11761	0.950230266
1072	Canterbury Museum Bulletin	1	11762	0.950311061
1073	?asopis Národního Muzea	1	11763	0.950391856
1074	Casopis Národního Muzea Praze	1	11764	0.950472651
1075	Ceylon Journal of Science	1	11765	0.950553446
1076	Chiba-seibutsu-shi	1	11766	0.950634241
1077	China Environmental Science Press	1	11767	0.950715036
1078	China Science and Technology Press	1	11768	0.950795831
1079	Chinese Forestry Publishing House	1	11769	0.950876626
1080	Chongqing Publishing House	1	11770	0.950957421
1081	Chro?my Przyrod? Ojczyst?	1	11771	0.951038216
1082	Chudleigh Publishing	1	11772	0.951119011
1083	Ciéncia e Cultura	1	11773	0.951199806
1084	Ciência e Cultura, Sao Paulo	1	11774	0.951280601
1085	Ciencias	1	11775	0.951361396
1086	Cistula Entomologica	1	11776	0.951442191
1087	Cocuyo	1	11777	0.951522986
1088	Collecting & Breeding, Tokyo	1	11778	0.951603781
1089	Comm. Book 61th Birthd. Dr. T. Yaginuma	1	11779	0.951684576
1090	Comptes Rendus Biologies	1	11780	0.951765371
1091	Comptes Rendus des Séances Mensuelles de la Societe des Sciences Naturelles et Physiques du Maroc	1	11781	0.951846166
1092	Comptes Rendus du XII Congrès International de Zoologie, Lisbonne 1935	1	11782	0.951926961
1093	Comunicaciones del Museo Nacional de Buenos Aires	1	11783	0.952007756
1094	Conferência Internacional dos Africanistas Ocidentais, Sessão	1	11784	0.952088551
1095	Congress of Yougoslavian Speleologists 3, Sarajevo	1	11785	0.952169346
1096	Conservation Reports of the Minami-Iwojima Wilderness Area	1	11786	0.952250141
1097	Conservazione Habitat Invertebrati	1	11787	0.952330936
1098	Contributions from Baylor University Museum	1	11788	0.952411731
1099	Contributions to Science of the Santa Barbara Museum of Natural History	1	11789	0.952492526
1100	Cornell Univ. Press	1	11790	0.952573321
1101	Cosejo Superior de Investigaciones Científicas	1	11791	0.952654117
1102	Countryside	1	11792	0.952734912
1103	Cuadernos de l'Espeleologia	1	11793	0.952815707
1104	Cultural	1	11794	0.952896502
1105	Dalnauka	1	11795	0.952977297
1106	Deinsea	1	11796	0.953058092
1107	Denkschrift der Akademie der Wissenschaften in Wien	1	11797	0.953138887
1108	Det Kongelige Danske Videnskabernes Selskabs Skrifter	1	11798	0.953219682
1109	Det Norske Videnskaps-Akademi i Oslo	1	11799	0.953300477
1110	Det Trondheimske Selskabs Skrifter	1	11800	0.953381272
1111	Die Natur (Vienna)	1	11801	0.953462067
1112	Die Zürcherische Jugend, von der Naturforschenden Gesellschaft	1	11802	0.953542862
1113	Discovery Report	1	11803	0.953623657
1114	Dnepropetrovsk	1	11804	0.953704452
1115	Dominion Museum Records in Entomology	1	11805	0.953785247
1116	Donántúli Dolgozatok Termeszettudomanyi Sorozat	1	11806	0.953866042
1117	Doriana, Supplemento agli Annali del Museo Cívico di Storia Naturale "G. Doria"	1	11807	0.953946837
1118	e-Acta Naturalia Pannonica	1	11808	0.954027632
1119	Eastern Cape Naturalist	1	11809	0.954108427
1120	Ecological Studies of Nature Conservation of the Ryukyu Islands	1	11810	0.954189222
1121	Ecology	1	11811	0.954270017
1122	Ed. Univ. Perm	1	11812	0.954350812
1123	Ejnar Munksgaard	1	11813	0.954431607
1124	Encyclopédie Méthodique, Histoire Naturelle, Entomologie	1	11814	0.954512402
1125	Endins	1	11815	0.954593197
1126	Entomofauna	1	11816	0.954673992
1127	Entomologia Generalis	1	11817	0.954754787
1128	Entomologica Scandinavica, Supplement	1	11818	0.954835582
1129	Entomologische Mitteilungen	1	11819	0.954916377
1130	Entomologische Mitteilungen aus dem Zoologischen Staatsinstitut und Zoologischen Museum Hamburg	1	11820	0.954997172
1131	Entomologische Rundschau, Stuttgart	1	11821	0.955077967
1132	Entomologische Zeitschrift, Guben	1	11822	0.955158762
1133	Entomologische Zeitschrift, Stettin	1	11823	0.955239557
1134	Entomologisches Nachrichtenblatt Troppau	1	11824	0.955320352
1135	Entomologiska Föreningen	1	11825	0.955401147
1136	Entomologist's Gazette	1	11826	0.955481942
1137	Entomology Circulars, Florida Department of Agriculture	1	11827	0.955562737
1138	Environment Conservation Journal	1	11828	0.955643532
1139	Ergeb. Deutsch. Tiefsee-Exped. Valdivia	1	11829	0.955724327
1140	Ergebnisse der Wissenschaftlichen Untersuchungen im Schweizerischen Nationalpark	1	11830	0.955805122
1141	Essex Naturalist, London	1	11831	0.955885917
1142	Estación Central Agronómica de Cuba, Second Report.	1	11832	0.955966712
1143	Estudos de Biologia, Curitiba	1	11833	0.956047507
1144	Ethology	1	11834	0.956128302
1145	Exotiske Insekter	1	11835	0.956209098
1146	Faculty of Humanics Revue, Otemon Gakuin University	1	11836	0.956289893
1147	Fauna Bohemiae Septentrionalis	1	11837	0.956370688
1148	Fauna och Flora, Uppsala	1	11838	0.956451483
1149	Fauna Polski	1	11839	0.956532278
1150	Fauna Republicii Socialiste România	1	11840	0.956613073
1151	Fauna Romaniei, Arachnida	1	11841	0.956693868
1152	Fermin-Didot et Cie	1	11842	0.956774663
1153	Field and Laboratory	1	11843	0.956855458
1154	Field Naturalist	1	11844	0.956936253
1155	Fieldiana Zoology, New Series	1	11845	0.957017048
1156	Fjölrit Náttúrufraedistofnunar	1	11846	0.957097843
1157	Folia Entomologica	1	11847	0.957178638
1158	Folia Faunistica Slovaca	1	11848	0.957259433
1159	Folia Scientifica Africae Centralis	1	11849	0.957340228
1160	Frankh-Kosmos Verlag	1	11850	0.957421023
1161	Freunde des Kölner Zoos	1	11851	0.957501818
1162	Garden City	1	11852	0.957582613
1163	Genus Supplement	1	11853	0.957663408
1164	Geologica Acta	1	11854	0.957744203
1165	Glasnik Hrvatskoga Prirodoslovnoga Drutva	1	11855	0.957824998
1166	Glasnik Republickog Zavoda za Zastitu Prirode i Prirodnjackog Muzeja Titogradu	1	11856	0.957905793
1167	Godišnje Izvješ?e carsko-kraljevski Velike Realke u Splitu	1	11857	0.957986588
1168	Great Lakes Entomologist	1	11858	0.958067383
1169	Guangxi Plant Protection	1	11859	0.958148178
1170	Guizhou People's Publishing House	1	11860	0.958228973
1171	Guizhou Science	1	11861	0.958309768
1172	Guizhou Science and Technology Publishing House	1	11862	0.958390563
1173	H. Veenman	1	11863	0.958471358
1174	Hacettepe Journal of Biology and Chemistry	1	11864	0.958552153
1175	Hakubutsu-gaku Zasshi	1	11865	0.958632948
1176	Hakubutsu-no-tomo	1	11866	0.958713743
1177	HarperCollins	1	11867	0.958794538
1178	Hebei University of Science and Techology Press	1	11868	0.958875333
1179	Helictite	1	11869	0.958956128
1180	Henan Science	1	11870	0.959036923
1181	Henan Science and Technology Publishing House	1	11871	0.959117718
1182	Histoire Naturelle	1	11872	0.959198513
1183	Historia natural, Corrientes	1	11873	0.959279308
1184	Hoikusha Publishing Co.	1	11874	0.959360103
1185	Hunan Press of Science and Technology	1	11875	0.959440898
1186	Hunan Science and Technology Press	1	11876	0.959521693
1187	Hunan Science and Technology Publishing House	1	11877	0.959602488
1188	Hunan Science and Techology Press	1	11878	0.959683284
1189	Hyogo Biology	1	11879	0.959764079
1190	Il Grottesco, Bollettino del Gruppo Grotte Milano CAI-SEM	1	11880	0.959844874
1191	Illustrated Fauna and Flora of Korea	1	11881	0.959925669
1192	Insect, Utsunomiya	1	11882	0.960006464
1193	Insecta Koreana	1	11883	0.960087259
1194	Insects Micronesia	1	11884	0.960168054
1195	Insekt-Nytt	1	11885	0.960248849
1196	Institute for Biological Problems of the North	1	11886	0.960329644
1197	Institute of Zoology, Bulgarian Academy of Sciences Monographs	1	11887	0.960410439
1198	International Congress of Entomology Proceedings	1	11888	0.960491234
1199	International Journal of Academic Research	1	11889	0.960572029
1200	International Journal of Zoology	1	11890	0.960652824
1201	International Rice Research Newsletter	1	11891	0.960733619
1202	Iowa State College Journal of Science	1	11892	0.960814414
1203	Irkutsk State University Publishing	1	11893	0.960895209
1204	Israel Journal of Entomology	1	11894	0.960976004
1205	?stanbul Üniversitesi Fen Fakültesi Mecmuas?	1	11895	0.961056799
1206	Izvestija Estedvenno-Nauchnogo Instituta pri Molotovskom Gosudarstvennom Universitete imeni M. Gor'kogo	1	11896	0.961137594
1207	Izvestija na Zoologiceskija Institut Sofija	1	11897	0.961218389
1208	Izvestija Severo-Kavkazskogo Naucnogo Centra Vyssej Skoly	1	11898	0.961299184
1209	Izvestiya Akademii Nauk Kazakhskoi SSR Seriya Biologicheskikh Nauk	1	11899	0.961379979
1210	Izvestiya Estestvenno-Nauchnogo Instituta pri Molotovskom Gosudarstvennom Universitete Imeni A. M. Gorkogo	1	11900	0.961460774
1211	Izvestiya Ministerstva Nauki-Akademii Nauk Respubliki Kazakhstan Seriya Biologicheskaya i Meditsinskaya	1	11901	0.961541569
1212	Izvestiya Otdelenie Biologicheskikh Nauk Akademii Tadzhikskoi SSR	1	11902	0.961622364
1213	Izwestia Aleksiewskago Donskogo. Politeknitschieskago Instituta	1	11903	0.961703159
1214	Izwestia Imperatorskago Obtchiestwa Lioubitelei Iestwoznania, Antropology i Etnografy, Sostoiaschago pri Imperatorskom Moskowskom Ouniwersitete	1	11904	0.961783954
1215	Izwestia na Beulgarskoto Entomologitschesko Droujestwo Sofia	1	11905	0.961864749
1216	Jacaranda Press	1	11906	0.961945544
1217	Jahrbuch der Kaiserlich-Königlichen Gelehrten Gesellschaft in Krakau	1	11907	0.962026339
1218	Japan International Cooperation Agency Project Publication	1	11908	0.962107134
1219	Japan Scientific Societies Press	1	11909	0.962187929
1220	Jenaische Denkschriften	1	11910	0.962268724
1221	John Murray	1	11911	0.962349519
1222	Jornadas sobre el Medio Natural Albacetense	1	11912	0.962430314
1223	Jornal de Agronomia, Piracicaba	1	11913	0.962511109
1224	Journal and Proceedings of the Royal Society of New South Wales	1	11914	0.962591904
1225	Journal de Physique, de Chimie et d'Histoire Naturelle, Paris	1	11915	0.962672699
1226	Journal of Agricultural University of Hebei	1	11916	0.962753494
1227	Journal of Agriculture of the University of Puerto Rico	1	11917	0.962834289
1228	Journal of Anatolian Natural Sciences	1	11918	0.962915084
1229	Journal of Anhui Teachers University	1	11919	0.962995879
1230	Journal of Applied Biological Sciences	1	11920	0.963076674
1231	Journal of Arthropod-Borne Diseases	1	11921	0.963157469
1232	Journal of Biology, Osaka City University	1	11922	0.963238265
1233	Journal of Cave and Karst Studies	1	11923	0.96331906
1234	Journal of Changde Teachers University, Natural Science Edition	1	11924	0.963399855
1235	Journal of Ecobiology	1	11925	0.96348065
1236	Journal of Experimental Sciences	1	11926	0.963561445
1237	Journal of Gansu Sciences	1	11927	0.96364224
1238	Journal of Guangxi Agricultural and Biological Science	1	11928	0.963723035
1239	Journal of Hangzhou University, Natural Science	1	11929	0.96380383
1240	Journal of Hebei Agricultural Sciences	1	11930	0.963884625
1241	Journal of Hebei Pedagogic College	1	11931	0.96396542
1242	Journal of Henan Normal University	1	11932	0.964046215
1243	Journal of Inner Mongolia Normal University	1	11933	0.96412701
1244	Journal of Inner Mongolia Teacher's University	1	11934	0.964207805
1245	Journal of Inner Mongolia Teacher's University, Natural Science Edition	1	11935	0.9642886
1246	Journal of Medical Entomology	1	11936	0.964369395
1247	Journal of Ningbo University, Natural Science Edition	1	11937	0.96445019
1248	Journal of Shaanxi Normal University Natural Science Edition	1	11938	0.964530985
1249	Journal of Shaanxi Teacher's University Natural Science Edition	1	11939	0.96461178
1250	Journal of Shadong University, Natural Sciences	1	11940	0.964692575
1251	Journal of Taiwan Museum	1	11941	0.96477337
1252	Journal of Taiwan Normal University, Mathematics, Science, Technology	1	11942	0.964854165
1253	Journal of the Academy of Natural Sciences of Philadelphia	1	11943	0.96493496
1254	Journal of the Bengal Natural History Society	1	11944	0.965015755
1255	Journal of the Devon Trust for Nature Conservation	1	11945	0.96509655
1256	Journal of the Elisha Mitchell Scientific Society	1	11946	0.965177345
1257	Journal of the Entomological Society of British Columbia	1	11947	0.96525814
1258	Journal of the Faculty of Agriculture, Hokkaido Imperial University, Sapporo, Japan	1	11948	0.965338935
1259	Journal of the Graduate School of Education, Kyungpook National University	1	11949	0.96541973
1260	Journal of the Hangzhou Teachers College	1	11950	0.965500525
1261	Journal of the Huizhou Teachers School	1	11951	0.96558132
1262	Journal of the Institute of Jamaica	1	11952	0.965662115
1263	Journal of the Institute of Polytechnics Osaka City University	1	11953	0.96574291
1264	Journal of the Jonan High School	1	11954	0.965823705
1265	Journal of the Royal Society of New Zealand	1	11955	0.9659045
1266	Journal of the Scientific Academy of Science Lisboa	1	11956	0.965985295
1267	Journal of the Shanxi Agricultural University	1	11957	0.96606609
1268	Journal of the Society for Asian Natural History	1	11958	0.966146885
1269	Journal of the Society of British Entomologists	1	11959	0.96622768
1270	Journal of the Southeast Guizhou National Teacher's College	1	11960	0.966308475
1271	Journal of Xiangtan Teachers College	1	11961	0.96638927
1272	Journal of Xinjiang Normal College	1	11962	0.966470065
1273	Journal of Yunan Agricultural University	1	11963	0.96655086
1274	Journal of Yunan University	1	11964	0.966631655
1275	Journal of Zaozhuang Normal College, Natural Science Edition	1	11965	0.966712451
1276	Journal of Zaozhuang Teachers College	1	11966	0.966793246
1277	Journal on New Biological Reports	1	11967	0.966874041
1278	Junior Philippine Scientist	1	11968	0.966954836
1279	Kaisei-sha Publishing Co.	1	11969	0.967035631
1280	Kansaishizenkagaku	1	11970	0.967116426
1281	Kansas School Naturalist	1	11971	0.967197221
1282	Katalog Fauny Polski	1	11972	0.967278016
1283	Kaupia - Darmstädter Beiträge zur Naturgeschichte	1	11973	0.967358811
1284	Ke xue chu ban she	1	11974	0.967439606
1285	Kieler Meeresforschungen	1	11975	0.967520401
1286	Kishu-doshokobutsu	1	11976	0.967601196
1287	Kishu-doshokubutsu (Zoology and Botany in Kishu)	1	11977	0.967681991
1288	Klí? zví?eny ?SSR	1	11978	0.967762786
1289	Kluwer Academic Publisher	1	11979	0.967843581
1290	Kokin-shoin, Tokyo	1	11980	0.967924376
1291	Koninklijke Nederlandse Akademie van Wetenschappen Amsterdam	1	11981	0.968005171
1292	Korea Research Institute of Bioscience and Biotechnology (KRIBB)	1	11982	0.968085966
1293	Korean Journal of Biology	1	11983	0.968166761
1294	Kullabergs Natur	1	11984	0.968247556
1295	Ky?do to Kagaku	1	11985	0.968328351
1296	Kyungpook Educational Forum Kyungpook National University	1	11986	0.968409146
1297	Kyushu University Press	1	11987	0.968489941
1298	La Semana Médica, Buenos Aires	1	11988	0.968570736
1299	Landbuch Verlag	1	11989	0.968651531
1300	L'arachnologiste	1	11990	0.968732326
1301	Laser Biology	1	11991	0.968813121
1302	Lavori della Società Italiana di Biogeografia	1	11992	0.968893916
1303	Ledoux	1	11993	0.968974711
1304	Lingnan Science Journal	1	11994	0.969055506
1305	Livre cinquantenaire Inst. Spéol. Emile Racovitza	1	11995	0.969136301
1306	Livredu Centenaire Émile G. Racovitza 1868- 1968	1	11996	0.969217096
1307	Lucr?rile Institutului de speologie “Emil Racovit?”	1	11997	0.969297891
1308	Lunds Universitets Årsskrift	1	11998	0.969378686
1309	Magazine of Natural History	1	11999	0.969459481
1310	Manaaki Whenua Press	1	12000	0.969540276
1311	Märkische Tierwelt	1	12001	0.969621071
1312	Mathematikai és Természettudományi Értesít?	1	12002	0.969701866
1313	Mathematikai és Természettudományi Közlemények	1	12003	0.969782661
1314	Mathematische und Naturwissenschaftliche Berichte aus Ungarn	1	12004	0.969863456
1315	Meddelanden från Göteborgs Musei Zoologiska Avdelning	1	12005	0.969944251
1316	Medio Ambiente	1	12006	0.970025046
1317	Melsheimer Entomological Series	1	12007	0.970105841
1318	Mémoires Couronnés et Mémoires des Savants Étrangers de l'Académie Royale des Sciences, des Lettres et des Beaux-Arts de Belgique	1	12008	0.970186637
1319	Mémoires de la Société des Sciences Naturelles de Neuchâtel	1	12009	0.970267432
1320	Mémoires de la Société d'Histoire Naturelle de l'Afrique du Nord	1	12010	0.970348227
1321	Mémoires de la Société d'Histoire Naturelle de Paris	1	12011	0.970429022
1322	Mémoires de la Société Entomologique de Belgique	1	12012	0.970509817
1323	Mémoires de la Société Linnéenne de Lyon	1	12013	0.970590612
1324	Mémoires de la Société Zoologique de France	1	12014	0.970671407
1325	Mémoires de l'Académie des Sciences de l'Institut de France	1	12015	0.970752202
1326	Mémoires de l'Académie Impériale des Sciences de Petrograd	1	12016	0.970832997
1327	Mémoires de l'Académie Impériale des Sciences de St.-Pétersbourg	1	12017	0.970913792
1328	Mémoires de l'Institut Français d'Afrique Noire	1	12018	0.970994587
1329	Mémoires de l'Institut Scientifique de Madagascar	1	12019	0.971075382
1330	Mémoires du Musée Royal d'Histoire Naturelle de Belgique	1	12020	0.971156177
1331	Mémoires du Muséum d'Histoire Naturelle de Paris	1	12021	0.971236972
1332	Mémoires de l'Académie des Sciences de Paris	1	12022	0.971317767
1333	Memoirs of the California Academy of Sciences	1	12023	0.971398562
1334	Memoirs of the Cornell University Agricultural Experiment Station	1	12024	0.971479357
1335	Memoirs of the National Museum of Victoria	1	12025	0.971560152
1336	Memoirs of the National Museum, Melbourne	1	12026	0.971640947
1337	Memoirs of the National Science Museum Tokyo, Series A, Zoology	1	12027	0.971721742
1338	Memorias da Academia Real das Sciencias de Lisboa	1	12028	0.971802537
1339	Memorias de la Sociedad de Ciencias Naturales La Salle	1	12029	0.971883332
1340	Memorias del Instituto Nacional de Investigaciones Cientificas	1	12030	0.971964127
1341	Memorias y Revista de la Sociedad Cientifica "Antonio Alzate"	1	12031	0.972044922
1342	Memorie del Museo Civico di Storia Naturale di Verona, 2. serie, Sezione Scienze della Vita	1	12032	0.972125717
1343	Memorie della Societa Italiana di Scienze Naturali e del Museo Civico di Storia Naturale di Milano	1	12033	0.972206512
1344	Memorie dell'Associazione Naturalistica Piemontese	1	12034	0.972287307
1345	Memorie di Matematica e di Fisica della Società Italiana delle Scienze	1	12035	0.972368102
1346	Microbiologia, Parazitologia, Epidemiologia	1	12036	0.972448897
1347	Ministerstvo prosveshcheniya RSFSR	1	12037	0.972529692
1348	Miscellanea Speologica Romanica	1	12038	0.972610487
1349	Miscellanea Zoologica Hungarica	1	12039	0.972691282
1350	Miscellaneous Papers, Centre for Entomological Studies Ankara	1	12040	0.972772077
1351	Misión Estudios de Patología Regional Argentina	1	12041	0.972852872
1352	Missione Biologica Sagan-Omo, Reale Accademia d’Italia, Roma	1	12042	0.972933667
1353	Mitteilungen aus dem Geologisch-Paläontologischen Institut der Universität Hamburg	1	12043	0.973014462
1354	Mitteilungen aus dem Hamburgischen Zoologischen Museum und Institut	1	12044	0.973095257
1355	Mitteilungen aus dem Naturhistorischen Museum in Hamburg	1	12045	0.973176052
1356	Mitteilungen der Abteilung für Zoologie am Landesmuseum Joanneum	1	12046	0.973256847
1357	Mitteilungen der Entomologischen Gesellschaft Basel	1	12047	0.973337642
1358	Mitteilungen der Geographischen Gesellschaft in Lübeck	1	12048	0.973418437
1359	Mitteilungen der Pollichia	1	12049	0.973499232
1360	Mitteilungen des Badischen Landesvereins für Naturkunde und Naturschutz	1	12050	0.973580027
1361	Mladinski Raziskovalni Tabori	1	12051	0.973660822
1362	Molecular Ecology	1	12052	0.973741618
1363	Monatsberichte der Königlich Preussischen Akademie der Wissenschaften zu Berlin	1	12053	0.973822413
1364	Monografias, Instituto Butantan	1	12054	0.973903208
1365	Monographiae Biologicae	1	12055	0.973984003
1366	Monthly Bulletin of the Philippine Health Service	1	12056	0.974064798
1367	Moscow, Akademia Nauk	1	12057	0.974145593
1368	Moscow, Akaedemia Nauk	1	12058	0.974226388
1369	Musée d'histoire naturelle de Genève	1	12059	0.974307183
1370	Musée Royal de l'Afrique Central	1	12060	0.974387978
1371	Museo Regionale Scienze Naturali Monografie 47	1	12061	0.974468773
1372	N. Orianda	1	12062	0.974549568
1373	Nachrichten der Gesellschaft der Freunde der Naturwissenschaften zu Moskau	1	12063	0.974630363
1374	Nachrichten des Naturwissenschaftlichen Museums der Stadt Aschaffenburg	1	12064	0.974711158
1375	Nagasaki Biological Society	1	12065	0.974791953
1376	Nankiseibutu	1	12066	0.974872748
1377	National Science Museum	1	12067	0.974953543
1378	Natl. Pest Control Assoc. techn. Release	1	12068	0.975034338
1379	Natur og Museum	1	12069	0.975115133
1380	Natur und Mensch	1	12070	0.975195928
1381	Natur und Museum	1	12071	0.975276723
1382	Natura Croatica	1	12072	0.975357518
1383	Natura Neotropicalis	1	12073	0.975438313
1384	Natura, Amsterdam	1	12074	0.975519108
1385	Natural History Society of Maryland	1	12075	0.975599903
1386	Naturalista Siciliano	1	12076	0.975680698
1387	Naturalistes Belges	1	12077	0.975761493
1388	Naturhistorisk Tidsskrift	1	12078	0.975842288
1389	Naturwissenschaftliche Abhandlungen, Wien	1	12079	0.975923083
1390	Natuurkundig Tijdschrift voor Nederlandsch-Indie	1	12080	0.976003878
1391	Netherlands Journal of Zoology	1	12081	0.976084673
1392	Neue Brehm-Bücherei	1	12082	0.976165468
1393	Neue Denkschriften der Schweizerischen Naturforschenden Gesellschaft	1	12083	0.976246263
1394	Neue Schriften der Naturforschenden Gesellschaft zu Halle	1	12084	0.976327058
1395	Neues Jahrbuch für Mineralogie, Geologie und Paläontologie, Abhandlungen	1	12085	0.976407853
1396	Neueste Schriften der Naturforschenden Gesellschaft in Danzig	1	12086	0.976488648
1397	New York Entomological Society	1	12087	0.976569443
1398	New Zealand Entomologist	1	12088	0.976650238
1399	Nieuwsbrief Spinnenwerkgroep Nederland	1	12089	0.976731033
1400	Noticiario mensual del Museo Nacional de Historia Natural, Santiago	1	12090	0.976811828
1401	Notiziario del Circolo Speleologico Romano	1	12091	0.976892623
1402	Nouveaux Mémoires de la Société Impériale de Naturalistes de Moscou	1	12092	0.976973418
1403	Nouvelles Annales du Muséum d'Histoire Naturelle de Paris	1	12093	0.977054213
1404	Nova Acta Academiae Caesareae Leopoldino-Carolinae Germanicae Naturae Curiosorum	1	12094	0.977135008
1405	Nova Acta Leopoldina, Abhandlungen der Kaiserlich Leopoldinisch-Carolinisch Deutschen Akademie der Naturforscher	1	12095	0.977215804
1406	Novi Commentarii Academiae Scientiarum Imperialis Petropolitanae	1	12096	0.977296599
1407	Novitates Zoologicae	1	12097	0.977377394
1408	NRC Research Press	1	12098	0.977458189
1409	Obra del Centenário del Museu de La Plata	1	12099	0.977538984
1410	Occasional Papers of the Bernice P. Bishop Museum	1	12100	0.977619779
1411	Occasional Papers of the Boston Society of Natural History	1	12101	0.977700574
1412	Occasional Papers of the California Academy of Sciences	1	12102	0.977781369
1413	Occasional Papers of the Florida State Collection of Arthropods	1	12103	0.977862164
1414	Occasional Papers of the Museum Texas Tech University	1	12104	0.977942959
1415	Occasional Papers of the Royal Ontario Museum of Zoology	1	12105	0.978023754
1416	Öfversigt af Finska Vetenskaps Societetens Förhandlingar	1	12106	0.978104549
1417	Ohio Biological Survey Notes	1	12107	0.978185344
1418	Opera Corcontica	1	12108	0.978266139
1419	Opera Lilloana	1	12109	0.978346934
1420	Opolskie Towarzystwo Przyjaciol Nauk Zeszyty Przyrodnicze	1	12110	0.978427729
1421	Otago University Press	1	12111	0.978508524
1422	Otemon Gakuin Univ. biol. Club	1	12112	0.978589319
1423	Oversigt over det Kongelige Danske Videnskabernes Selskabs Forhandlinger	1	12113	0.978670114
1424	Oxford University Press	1	12114	0.978750909
1425	Pakistan Journal of Agricultural Sciences	1	12115	0.978831704
1426	Panstowe Wydawnictwo Naukowe	1	12116	0.978912499
1427	Paris, Sciences physiques, Zoologie	1	12117	0.978993294
1428	Payot	1	12118	0.979074089
1429	Peking Natural History Bulletin	1	12119	0.979154884
1430	Pénélope	1	12120	0.979235679
1431	Pensoft	1	12121	0.979316474
1432	Pensoft Publishers	1	12122	0.979397269
1433	Pergamon Press	1	12123	0.979478064
1434	Perio?dico Zoolo?gico	1	12124	0.979558859
1435	Plant Protection Bulletin	1	12125	0.979639654
1436	Polska Akad. Nauk	1	12126	0.979720449
1437	Postilla	1	12127	0.979801244
1438	Práce Brn?nské Základny ?eskoslovenské Akademie V?d	1	12128	0.979882039
1439	Priamus	1	12129	0.979962834
1440	Primer Congr. Latinoamer. Ent.	1	12130	0.980043629
1441	Príroda, Brno	1	12131	0.980124424
1442	Prirodoslovne Razprave	1	12132	0.980205219
1443	Prírodovedecká Fakulta Univerzity Komenskéhó	1	12133	0.980286014
1444	P?írodov?decký Sborník Ostravského Kraje	1	12134	0.980366809
1445	Proceedings and Transactions of the British Entomological and Natural History Society	1	12135	0.980447604
1446	Proceedings of Recent Advances in Life Sciences, Dibrugarh University	1	12136	0.980528399
1447	Proceedings of the 1<sup>st</sup> Conference of the Central Agricultural Pesticide Laboratory	1	12137	0.980609194
1448	Proceedings of the Arkansas Academy of Science	1	12138	0.980689989
1449	Proceedings of the Berwickshire Naturalists' Club	1	12139	0.980770785
1450	Proceedings of the Entomological Society of Ontario	1	12140	0.98085158
1451	Proceedings of the First All-India Congress of Zoology 1959	1	12141	0.980932375
1452	Proceedings of the Imperial Academy, Tokyo	1	12142	0.98101317
1453	Proceedings of the Indian Science Congress	1	12143	0.981093965
1454	Proceedings of the Royal Society of Queensland	1	12144	0.98117476
1455	Proceedings of the Russian Entomological Society in St. Petersburg	1	12145	0.981255555
1456	Programm zur öffentlichen Prüfung der Schüler der höheren Burgschule Königsberg	1	12146	0.98133635
1457	Pubblicazioni dell'Istituto di Entomologia dell'Università di Pavia	1	12147	0.981417145
1458	Publicaciones Especiales del Instituto de Biología, Universidad Nacional Autónoma de México	1	12148	0.98149794
1459	Publicaciones Ocasionales del Museo Nacional de Historia Natural, Santiago	1	12149	0.981578735
1460	Publicações do Instituto Zoologia Doutor Augusto Nobre	1	12150	0.98165953
1461	Publications of the Oklahoma Biological Survey	1	12151	0.981740325
1462	Publications of the Seto Marine Biological Laboratory	1	12152	0.98182112
1463	Publications, Carnegie Institution of Washington	1	12153	0.981901915
1464	Published by the authors	1	12154	0.98198271
1465	Quaderni della Stazione di Ecologia del Civico Museo di Storia Naturale di Ferrara	1	12155	0.982063505
1466	Quaderni di Speleologia, Circolo Speleologico Romano	1	12156	0.9821443
1467	Quaestiones entomologicae	1	12157	0.982225095
1468	Quarterly Journal of Microscopical Science	1	12158	0.98230589
1469	Quarterly Journal of the Taiwan Museum	1	12159	0.982386685
1470	Queensland Museum	1	12160	0.98246748
1471	Quelle & Meyer	1	12161	0.982548275
1472	Rassegna Faunistica	1	12162	0.98262907
1473	Reale Accademia d'Italia	1	12163	0.982709865
1474	Rec. West. Aust. Mus., Suppl.	1	12164	0.98279066
1475	Records of the Dominion Museum, Wellington	1	12165	0.982871455
1476	Records of the Queen Victoria Museum, Launceston	1	12166	0.98295225
1477	Records of the Zoological Survey of India, Miscellaneous Publications, Occasional Paper	1	12167	0.983033045
1478	Rep. sci. Res. Mt. Kirishima	1	12168	0.98311384
1479	Report of Fur-Seal Investigations	1	12169	0.983194635
1480	Report of the First Scientific Expedition to Manchoukuo	1	12170	0.98327543
1481	Reports from the Department of Biology, University of Turku	1	12171	0.983356225
1482	Reports from the Department of Zoology, University of Turku	1	12172	0.98343702
1483	Reports of the Institute for Nature Study, Tokyo (Miscellaneous reports of the National Park for Nature Study)	1	12173	0.983517815
1484	Reports of the Korean Association for Conservation of Nature	1	12174	0.98359861
1485	Research Bulletin of the Panjab University	1	12175	0.983679405
1486	Research Bulletin of the Panjab University, New Series	1	12176	0.9837602
1487	Research Bulletin of the Panjab University, Zoology	1	12177	0.983840995
1488	Resúmenes II Congreso Argentino de Entomología, Córdoba	1	12178	0.98392179
1489	Resúmenes y Comunicaciones, I Jornadas de Ciencias Naturales, Montevideo	1	12179	0.984002585
1490	Revista de la Ca?tedra de Microbiologi?a y Parasitologi?a, Buenos Aires	1	12180	0.98408338
1491	Revista Española de Entomologia	1	12181	0.984164175
1492	Revista Nicaraguense de Entomología	1	12182	0.984244971
1493	Revista Peruana de Medicina Experimental y Salud Publica	1	12183	0.984325766
1494	Revista Sciencias	1	12184	0.984406561
1495	Revistas de la Facultad de Ciencias Exactas, Físicas y Naturales de la Universidad Nacional de Córdoba	1	12185	0.984487356
1496	Revistas de la Universidad Nacional de Córdoba	1	12186	0.984568151
1497	Revue Biologique du Nord de la France	1	12187	0.984648946
1498	Revue de l'Académie Bulgare des Sciences	1	12188	0.984729741
1499	Revue d'Écologie et de Biologie du Sol	1	12189	0.984810536
1500	Revue Roumaine de Biologie	1	12190	0.984891331
1501	Rhizocrinus	1	12191	0.984972126
1502	Rigaku-kai	1	12192	0.985052921
1503	Rivista di Biologia	1	12193	0.985133716
1504	Rivista Piemontese di Storia Naturale	1	12194	0.985214511
1505	Russian Entomological Journal	1	12195	0.985295306
1506	S&atilde;o Paulo, Edart	1	12196	0.985376101
1507	Sahlbergia	1	12197	0.985456896
1508	Saito Ho-On Kai Museum Research Bulletin	1	12198	0.985537691
1509	Sandhill Crane Press	1	12199	0.985618486
1510	Sarawak Museum Journal	1	12200	0.985699281
1511	Sborník P?írodov?decké Spole?nosti v Moravské Ostrav?	1	12201	0.985780076
1512	Sborník P?írodov?deckého Klubuv Uherském Hradišti	1	12202	0.985860871
1513	Sborník Severo?eského Muzea	1	12203	0.985941666
1514	Sborník Trudov Zoologicheskogo Muzeya MGU, Moscow State University	1	12204	0.986022461
1515	Sborník Vysoké Školy Zem?d?lské, Brno	1	12205	0.986103256
1516	Science	1	12206	0.986184051
1517	Science Report of the Faculty of Liberal Arts and Education, Nagasaki University	1	12207	0.986264846
1518	Scientific Memoirs of the M. Gorky State University of Perm	1	12208	0.986345641
1519	Scientific Papers of the Namib Desert Research Station	1	12209	0.986426436
1520	Scientific Publishers	1	12210	0.986507231
1521	Scientific Reports, Series C	1	12211	0.986588026
1522	Scientific Research and Essay	1	12212	0.986668821
1523	Scientific Treatise on Systematic and Evolutionary Zoology	1	12213	0.986749616
1524	Segunda Jornada Entomoepidemiológica Argentina	1	12214	0.986830411
1525	Select. Sci. Treat. Lit. (Biol. Monogr.), Shaanxi Teachers Univ.	1	12215	0.986911206
1526	Senckenbergiana	1	12216	0.986992001
1527	Seoul National Univ.	1	12217	0.987072796
1528	Separate, published by P. A. Norstedt & Söner	1	12218	0.987153591
1529	Shaanxi Prov. zool. Assoc. Dissert. Anthol.	1	12219	0.987234386
1530	Shaanxi Science and Technology Press	1	12220	0.987315181
1531	Shandong University Publishing House	1	12221	0.987395976
1532	Shokubutsu Boeki	1	12222	0.987476771
1533	Sichuan Journal of Agricultural Science	1	12223	0.987557566
1534	Sichuan Science and Technology Publishing House	1	12224	0.987638361
1535	Sitzungsberichte der Gesellschaft zur Beförderung der Gesamten Naturwissenschaften zu Marburg	1	12225	0.987719156
1536	Sitzungsberichte der Königlichen Böhmischen Gesellschaft der Wissenschaften, Mathematisch-naturwissenschaftliche Klasse	1	12226	0.987799952
1537	Sitzungsberichte und Abhandlungen der Naturwissenschaftlichen Gesellschaft Isis in Dresden	1	12227	0.987880747
1538	Sklípkan	1	12228	0.987961542
1539	Smithsonian Miscellaneous Collections	1	12229	0.988042337
1540	Societas Historico-Naturalis Croatica	1	12230	0.988123132
1541	South African Medical Journal	1	12231	0.988203927
1542	Southwestern Naturalist	1	12232	0.988284722
1543	Special Bulletin of the Liverpool Museum	1	12233	0.988365517
1544	Speleologicheskii Biulleten Estestvenno-Nauchnogo Instituta pri Molotovskom Gosudarstvennom Universitete im M. Gorkogo	1	12234	0.988446312
1545	Speleon	1	12235	0.988527107
1546	Spider Club News	1	12236	0.988607902
1547	Spolia Zeylan	1	12237	0.988688697
1548	Sprawozdania Komisyi Fisyógraficznej Akademii Umiejetnosci w Krakowie	1	12238	0.988769492
1549	Springer-Verlag	1	12239	0.988850287
1550	Stapfia	1	12240	0.988931082
1551	State Fauna Series 3: Fauna of West Bengal	1	12241	0.989011877
1552	Studia Societatis Scientiarum Torunensis, Sectio E, Zoologia	1	12242	0.989092672
1553	Studia Universitatis Babe?-Bolyai Biologia	1	12243	0.989173467
1554	Studien aus dem Gebiete der Allgemeinen Karstforschung	1	12244	0.989254262
1555	Studies for Nature Conservation and Restoration in Mino-o Dam Area, Osaka Prefecture	1	12245	0.989335057
1556	Studii ?i Cercet?ride Biologie, Seria Biologie Animal?	1	12246	0.989415852
1557	Studio Bergamo	1	12247	0.989496647
1558	Supplementa Entomologica	1	12248	0.989577442
1559	Süswasserfauna von Mitteleuropa	1	12249	0.989658237
1560	Systematic Parasitology	1	12250	0.989739032
1561	Taichung Junior Teachers College Publisher	1	12251	0.989819827
1562	Tane	1	12252	0.989900622
1563	Taprobanica	1	12253	0.989981417
1564	Tasmanian Museum and Art Gallery	1	12254	0.990062212
1565	Taxa, Proceedings of the Japanese Society of Systematic Zoology	1	12255	0.990143007
1566	Tbilisi University	1	12256	0.990223802
1567	Technical Bulletin, Virginia Agricultural Experiment Station, Blacksburg, Virginia	1	12257	0.990304597
1568	Tecnociencia	1	12258	0.990385392
1569	Territory & Natural Resources Study	1	12259	0.990466187
1570	Texas Agriculture Experiment Station	1	12260	0.990546982
1571	Thai Journal of Agricultural Science	1	12261	0.990627777
1572	The Bison	1	12262	0.990708572
1573	The Central Mediterranean Naturalist	1	12263	0.990789367
1574	The Lancashire and Cheshire Naturalist	1	12264	0.990870162
1575	The Lancashire Naturalist	1	12265	0.990950957
1576	The New York Entomological Society	1	12266	0.991031752
1577	The Norwegian-British-Swedish Antarctic Expedition 1949-52, Scientific Results	1	12267	0.991112547
1578	The Popular Science Monthly	1	12268	0.991193342
1579	The Raffles Bulletin of Zoology, Supplement	1	12269	0.991274138
1580	The Scottish Naturalist	1	12270	0.991354933
1581	The University of California Publications in Entomology	1	12271	0.991435728
1582	The Zoological Record	1	12272	0.991516523
1583	Theses collection commemorating the 60<sup>th</sup> Birthday of Dr. In Sock Yang	1	12273	0.991597318
1584	Theses collection commemorating the 60<sup>th</sup> Birthday of Prof. Yung Ho Choi	1	12274	0.991678113
1585	Tian Ze Publishing House	1	12275	0.991758908
1586	Tianjin Press of Science and Techniques	1	12276	0.991839703
1587	Tirion	1	12277	0.991920498
1588	Toxicon	1	12278	0.992001293
1589	Trabajos del Laboratorio de Zoologia de la Universidad de Chile	1	12279	0.992082088
1590	Transactions and Annual Report of the "Nottingham Naturalists' Society"	1	12280	0.992162883
1591	Transactions of the Entomological Society of New South Wales	1	12281	0.992243678
1592	Transactions of the Guernsey Society of Natural History	1	12282	0.992324473
1593	Transactions of the Hertfordshire Natural History Society and Field Club	1	12283	0.992405268
1594	Transactions of the Liaoning Zoological Society	1	12284	0.992486063
1595	Transactions of the Northern Naturalists' Union	1	12285	0.992566858
1596	Transactions of the Royal Canadian Institute, Toronto	1	12286	0.992647653
1597	Transactions of the Royal Society of South Africa	1	12287	0.992728448
1598	Transactions of the San Diego Society of Natural History	1	12288	0.992809243
1599	Transactions of the Suffolk Naturalists' Society	1	12289	0.992890038
1600	Transactions of the Zoological Society of London	1	12290	0.992970833
1601	Trav. Inst. Spéol. "Émile Racovitza"	1	12291	0.993051628
1602	Travaux de l'Institut Agricole d'Azow-Mer Noire	1	12292	0.993132423
1603	Travaux de l'Institut Français d'Études Andines	1	12293	0.993213218
1604	Travaux de l'Institut Scientifique Chérifien et de la Faculté des Sciences, Série Zoologie, Rabat	1	12294	0.993294013
1605	Treballs de la Institució Catalana d'Historia Natural	1	12295	0.993374808
1606	Trends in Life Sciences	1	12296	0.993455603
1607	Triops Verlag	1	12297	0.993536398
1608	Troudy Obtchiestwa Ispytatelei Prirody pri Imperatorskom Charkowskom Ouniwersitete	1	12298	0.993617193
1609	Trudy Alma-Atinskogo Gosudarstvennogo Zapovednika	1	12299	0.993697988
1610	Trudy Gosudarstvennogo Zapovednika "Rostovskii"	1	12300	0.993778783
1611	Trudy Imperatorskago Obtchiestwa Iestiestwoispytatelei pri St.-Peterbourgskago	1	12301	0.993859578
1612	Trudy Pechoro-Ilycheskogo Gosudarstvennogo Zapovednika	1	12302	0.993940373
1613	Trudy Soveta po Izuceniju Proizvoditeljnych Sil, Serija Turkmenskaja	1	12303	0.994021168
1614	Turrialba	1	12304	0.994101963
1615	Übersicht der Arbeiten und Veränderungen der Schlesischen Gesellschaft für Vaterländische Kultur im Jahre	1	12305	0.994182758
1616	Uchenye Zapiski Kalininskogo Gosudarstvennogo Pedagogicheskogo Instituta	1	12306	0.994263553
1617	Uchenye Zapiski Molotovskogo Universiteta	1	12307	0.994344348
1618	Uchenye Zapiski, Molotovskii Gosudarstvennyj Universitet Imeni A. M. Gorkogo	1	12308	0.994425143
1619	Uchenye Zapiski, Permskii Gosudarstvennyi Universitet M. Gorkogo	1	12309	0.994505938
1620	Uchenye Zapiski, Permskij Gosudarstvennyj Universitet Imeni A. M. Gorkogo	1	12310	0.994586733
1621	Uchenye Zapiski, Permskij Ordena Trudovogo Krasnogo Znameni Gosudarstvennyj Universitet Imeni A. M. Gorkogo	1	12311	0.994667528
1622	Universidad Antioquia	1	12312	0.994748324
1623	University of Iowa Studies in Natural History	1	12313	0.994829119
1624	University of Washington Press	1	12314	0.994909914
1625	University of Washington Publications in Biology	1	12315	0.994990709
1626	Uppsala, Zoologi, Arachnida	1	12316	0.995071504
1627	Utschenjich Zapisok Permskogo Universitete	1	12317	0.995152299
1628	Van Nostrand Reinhold	1	12318	0.995233094
1629	Veda Prírodní	1	12319	0.995313889
1630	Verhandlungen der Zoologisch-Botanischen Gesellschaft in Wien	1	12320	0.995394684
1631	Verhandlungen, VII. Internationaler Kongress für Entomologie, Berlin	1	12321	0.995475479
1632	Verlag Paul Parey	1	12322	0.995556274
1633	Veröffentlichungen des Tiroler Landesmuseums Ferdinandeum	1	12323	0.995637069
1634	Vestnik	1	12324	0.995717864
1635	Vestnik Juznogo Nautchogo Tsjentra	1	12325	0.995798659
1636	Vestnik Orenburgskogo gosudarstvennogo Universiteta	1	12326	0.995879454
1637	Vestnik Yuzhnogo Nauchnogo Tsentra RAN, Rostov	1	12327	0.995960249
1638	Vestnik Yuzhnogo Nauchnogo Tsentra Rossijskaja Akademija Nauk, Rostov	1	12328	0.996041044
1639	Victoria Naturalist	1	12329	0.996121839
1640	Vidya	1	12330	0.996202634
1641	Vie et Milieu, Supplement	1	12331	0.996283429
1642	Vieraea	1	12332	0.996364224
1643	Vlastiv?dný Sborník Vyso?iny, Oddíl V?d P?írodních	1	12333	0.996445019
1644	Washington, 32nd Congress, 2nd Session, Senate	1	12334	0.996525814
1645	Western Australian Naturalists Club	1	12335	0.996606609
1646	Weta	1	12336	0.996687404
1647	Wiley Eastern	1	12337	0.996768199
1648	World Journal of Zoology	1	12338	0.996848994
1649	Wuhan Publishing House	1	12339	0.996929789
1650	Wuyi Science Journal	1	12340	0.997010584
1651	Wy?sza Szkola Pedagogiczna Siedlcach	1	12341	0.997091379
1652	Wy?sza Szkola Rolniczo-Pedagogiczna W Siedlcach	1	12342	0.997172174
1653	Wy?sza Szkola Rolniczo-Pedagogiczna W Siedlcach Rozprawa Naukowa	1	12343	0.997252969
1654	Wy?sza Szkola Rolniczo-Pedagogiczna, Siedlcach	1	12344	0.997333764
1655	Yamanashi No Konchu	1	12345	0.997414559
1656	Yemeni-German Plant Protection Project	1	12346	0.997495354
1657	Zapiski Biologhitscheskoi Stantzii Obtchiestwa Lioubitelei Iestiestwoznania, Antropologhii i Etnografii w Boltchewie Moskowskoi Goubernii	1	12347	0.997576149
1658	Zapiski Imperatorskoi Akademy Naouk St. Petersburg	1	12348	0.997656944
1659	Zapiski Imperatorskoi Rousskago Geografitscheskago Obtchiestwa po Obtchey Geografy	1	12349	0.997737739
1660	Zapiski Kiewskago Obtchiestwa Iestiestwoispytatelei	1	12350	0.997818534
1661	Zara, Fratelli Battara	1	12351	0.997899329
1662	Zashita Rastenii	1	12352	0.997980124
1663	Zborník Prác Tatranskom Narodnom Parku	1	12353	0.998060919
1664	Zeitschrift für Angewandte Entomologie	1	12354	0.998141714
1665	Zeitschrift für die Gesammten Naturwissenschaften, Dritte Folge	1	12355	0.998222509
1666	Zeitschrift für die Gesammten Naturwissenschaften, Neue Folge	1	12356	0.998303305
1667	Zeitschrift für Semiotik	1	12357	0.9983841
1668	Zeszyty Naukowe Wy?szej Szkoly Rolniczo-Pedagogicznej	1	12358	0.998464895
1669	Zhejiang Science and Technology Publishing House	1	12359	0.99854569
1670	Zhivotnii mir SSSR, zona stepei.	1	12360	0.998626485
1671	Ziva	1	12361	0.99870728
1672	Znanie Press	1	12362	0.998788075
1673	Zoe	1	12363	0.99886887
1674	Zoología	1	12364	0.998949665
1675	Zoologica Baetica	1	12365	0.99903046
1676	Zoologica Poloniae	1	12366	0.999111255
1677	Zoologica, Scientific Contributions of the New York Zoological Society	1	12367	0.99919205
1678	Zoological Museum, Moscow State University	1	12368	0.999272845
1679	Zoological Survey of India, Conservation Area Series	1	12369	0.99935364
1680	Zoological Systematics	1	12370	0.999434435
1681	Zoologie (Leipzig)	1	12371	0.99951523
1682	Zoologische Abhandlungen, Staatliches Museum für Tierkunde Dresden	1	12372	0.999596025
1683	Zoologische Jahrbücher, Abteilung für Anatomie und Ontogenie der Tiere	1	12373	0.99967682
1684	Zoology	1	12374	0.999757615
1685	Zooloogia ja Botaanika Instituut	1	12375	0.99983841
1686	Zoomorphology	1	12376	0.999919205
1687	Zubía Monográfico	1	12377	1
