# Supplementary material for: Integrating and visualizing primary data from prospective and legacy taxonomic literature
Source: Biodivers Data J. 2015 May 12;(3):e5063. doi: 10.3897/BDJ.3.e5063 (PMC4442254; doi:10.3897/BDJ.3.e5063)
Supplement: Supplementary material 3 — World Spider Catalog Bibliographic Data: Treatments [file biodiversity_data_journal-3-e5063-s003.csv]

Rank	Publisher	Treatments	Cumulative	Cumulative proportion
1	Bulletin of the American Museum of Natural History	4537	4537	0.035831339
2	Bulletin of the Museum of Comparative Zoology at Harvard College	3761	8298	0.065534153
3	Zootaxa	3314	11612	0.091706747
4	American Museum Novitates	3255	14867	0.117413383
5	Hebei University of Science and Techology Publishing House	2309	17176	0.135648905
6	Annales de la Socit Entomologique de France	2040	19216	0.151759977
7	Journal of Arachnology	1915	21131	0.16688385
8	Bulletin of the British Arachnological Society	1838	22969	0.18139961
9	Arthropoda Selecta	1813	24782	0.19571793
10	Proceedings of the Zoological Society of London	1643	26425	0.208693661
11	Revue Suisse de Zoologie	1598	28023	0.221314
12	Tokai University Press	1484	29507	0.233034015
13	Acta Arachnologica, Tokyo	1467	30974	0.244619771
14	Science Press	1432	32406	0.255929111
15	Annali del Museo Civico di Storia Naturale di Genova	1389	33795	0.266898856
16	Annales Zoologici, Warszawa	1269	35064	0.27692089
17	Beitrge zur Araneologie	1174	36238	0.286192654
18	Kyo-Hak Publishing Co.	1103	37341	0.294903689
19	Verlag Paul Parey	1063	38404	0.303298821
20	Annals and Magazine of Natural History	1026	39430	0.311401742
21	Zoological Journal of the Linnean Society	1014	40444	0.319409893
22	Korean Arachnology	1007	41451	0.32736276
23	Senckenbergiana Biologica	989	42440	0.33517347
24	Bulletin of the University of Utah	911	43351	0.34236817
25	Transactions of the Connecticut Academy of Arts and Sciences	903	44254	0.349499688
26	Ray Society	891	45145	0.356536436
27	Annales Zoologici Fennici	834	45979	0.363123021
28	Hunan Science and Technology Press	825	46804	0.369638528
29	Annales de la Socit Entomologique de Belgique	800	47604	0.375956595
30	Exploration du Parc National de l'Upemba, Mission G. F. de Witte	797	48401	0.382250969
31	Kl¡? zv¡?eny ?SSR	751	49152	0.388182055
32	Zoologica	742	49894	0.394042063
33	Otago Museum Bulletin	740	50634	0.399886275
34	Verhandlungen der Kaiserlich-Kniglichen Zoologisch-Botanischen Gesellschaft in Wien	711	51345	0.405501457
35	Mmoires de la Socit Linnenne de Lyon	700	52045	0.411029766
36	Abhandlungen der Senckenbergischen Naturforschenden Gesellschaft	699	52744	0.416550177
37	Memoirs of the Queensland Museum	689	53433	0.421991613
38	Fabreries, Supplement	658	54091	0.427188223
39	Harley Books	637	54728	0.432218984
40	ZooKeys	634	55362	0.437226053
41	Proceedings of the Academy of Natural Sciences of Philadelphia	607	55969	0.442019886
42	Hoikusha Publishing Co.	559	56528	0.446434636
43	Proceedings of the California Academy of Sciences	554	57082	0.450809897
44	Zoologischer Anzeiger	549	57631	0.455145671
45	Published by the author	544	58175	0.459441957
46	Records of the Australian Museum	531	58706	0.463635574
47	Tirion	530	59236	0.467821293
48	Bulletin of the Connecticut State Geological and Natural History Survey	513	59749	0.471872754
49	Manchester University Press	496	60245	0.475789956
50	Psyche, Cambridge	494	60739	0.479691362
51	Kaisei-sha Publishing Co.	493	61232	0.483584871
52	Transactions of the Wisconsin Academy of Sciences, Arts and Letters	493	61725	0.48747838
53	Revue Zoologique Africaine	488	62213	0.491332401
54	Annals of the South African Museum	487	62700	0.495178525
55	Acta Zootaxonomica Sinica	469	63169	0.498882492
56	HarperCollins	454	63623	0.502467995
57	The Canadian Entomologist	451	64074	0.506029805
58	Bulletin du Musum National d'Histoire Naturelle de Paris	447	64521	0.509560026
59	Revista del Museo de La Plata	444	64965	0.513066553
60	Physis, Revista de la Sociedad Argentina de Ciencias Naturales	428	65393	0.516446719
61	Mmoires du Musum National d'Histoire Naturelle de Paris	426	65819	0.51981109
62	Annales of the Entomological Society of America	421	66240	0.523135973
63	Insect Systematics & Evolution, Supplement	418	66658	0.526437163
64	Zoologicheski? Zhurnal	414	67072	0.529706763
65	Fitzgerald Publishing	411	67483	0.53295267
66	Journal of Natural History	411	67894	0.536198577
67	Revue Arachnologique	408	68302	0.539420791
68	Hoikusha	406	68708	0.54262721
69	Henan Science and Technology Publishing House	401	69109	0.545794142
70	Research Branch Agriculture Canada Publication	401	69510	0.548961073
71	Archiv fr Naturgeschichte	400	69910	0.552120106
72	Bihang till Kongliga Svenska Vetenskaps-Akademiens Handlingar	399	70309	0.555271243
73	Fauna Fennica	395	70704	0.558390788
74	Fauna India	386	71090	0.561439256
75	Annales du Muse Royal d'Histoire Naturelle de Belgique	379	71469	0.56443244
76	Arkiv fr Zoologi	379	71848	0.567425625
77	Hunan Normal University Press	373	72221	0.570371423
78	Neue Brehm-Bcherei	368	72589	0.573277734
79	Journal of The New York Entomological Society	350	72939	0.576041889
80	Memorie della Societ Entomologica Italiana, Genova	344	73283	0.578758658
81	Tianjin Press of Science and Techniques	343	73626	0.581467529
82	CAB International	337	73963	0.584129015
83	Zoologica Scripta	336	74299	0.586782603
84	Zoologische Jahrbcher, Abteilung fr Systematik, Geographie und Biologie der Tiere	335	74634	0.589428294
85	Invertebrate Systematics	330	74964	0.592034497
86	Acta Arachnologica Sinica	328	75292	0.594624904
87	Schriften der Naturforschenden Gesellschaft in Danzig	325	75617	0.597191619
88	Arquivos do Museu Nacional do Rio de Janeiro	323	75940	0.599742539
89	Tierwelt Deutschlands	316	76256	0.602238175
90	Annals of the Natal Museum	309	76565	0.604678529
91	Anais da Academia Brasileira de Cincias	306	76871	0.60709519
92	Annales, Muse Royal de l'Afrique Centrale, Sciences zoologiques	306	77177	0.60951185
93	Iheringia, Srie Zoologia	303	77480	0.611904818
94	Acta Zoologica Fennica	299	77779	0.614266196
95	Zhejiang Science and Technology Publishing House	297	78076	0.616611778
96	Bulletin International de l'Academie des Sciences de Cracovie	291	78367	0.618909975
97	Revue de Zoologie et de Botanique Africaines	290	78657	0.621200275
98	Arachnological Society of Japan	289	78946	0.623482677
99	Bulletin de la Socit Zoologique de France	288	79234	0.625757181
100	Records of the Zoological Survey of India	285	79519	0.628007992
101	Wy?sza Szkola Rolniczo-Pedagogiczna, Siedlcach	281	79800	0.630227213
102	Berichte des Naturwissenschaftlich-Medizinischen Vereins in Innsbruck	273	80073	0.632383254
103	Arachnologisches Magazin	269	80342	0.634507704
104	Revista Brasileira de Zoologia	266	80608	0.636608461
105	Tbilisi University	263	80871	0.638685526
106	Agriculture Publishing House	261	81132	0.640746796
107	Gteborgs Kungliga Vetenskaps och Witterhets Samhllet Handlingar	261	81393	0.642808065
108	Shandong University Publishing House	260	81653	0.644861437
109	Tijdschrift voor Entomologie	258	81911	0.646899014
110	Atypus	253	82164	0.648897102
111	Transactions of the American Microscopical Society	252	82416	0.650887294
112	Horae Societatis Entomologicae Rossicae	249	82665	0.652853792
113	Bulletin of the British Museum of Natural History	248	82913	0.654812393
114	Proceedings of the Dorset Natural History and Antiquarian Field Club	247	83160	0.656763096
115	Actes de la Socit Linnenne de Bordeaux	246	83406	0.658705902
116	Records of the Zoological Survey of India, Occasional Paper	246	83652	0.660648708
117	Sichuan Science and Technology Publishing House	237	83889	0.662520435
118	Archives de Zoologie Exprimentale et Gnrale	234	84123	0.66436847
119	Genus	234	84357	0.666216504
120	Smithsonian Contributions to Zoology	232	84589	0.668048744
121	Wy?sza Szkola Pedagogiczna Siedlcach	232	84821	0.669880983
122	Revista do Museu Paulista	230	85051	0.671697428
123	Revista Ibrica de Aracnolog¡a	230	85281	0.673513872
124	Siri Scientific Press	229	85510	0.675322419
125	Boston Journal of Natural History	221	85731	0.677067785
126	Association for Mexican Cave Studies Bulletin	218	85949	0.678789458
127	Reichenbachia	214	86163	0.680479541
128	Records of the Canterbury Museum	212	86375	0.682153829
129	Zoologische Beitrge	210	86585	0.683812322
130	Zoologische Verhandelingen	208	86793	0.685455019
131	Brill	207	87000	0.687089819
132	Israel Journal of Zoology	206	87206	0.688716722
133	Zoolog¡a	206	87412	0.690343624
134	Transactions of the New Zealand Institute	205	87617	0.691962629
135	Triops Verlag	204	87821	0.693573736
136	Commentationes Pontificia Academia Scientiarum	203	88024	0.695176945
137	Wuhan Publishing House	202	88226	0.696772257
138	Mitteilungen aus dem Zoologischen Museum in Berlin	201	88427	0.698359672
139	Australian Journal of Zoology	200	88627	0.699939189
140	Bonner Zoologische Monographien	200	88827	0.701518705
141	Hebei University of Science and Techology Press	200	89027	0.703098222
142	Fauna Hungariae	199	89226	0.704669841
143	Bulletin de l'Institut Royal des Sciences Naturelles de Belgique	198	89424	0.706233563
144	Occasional Papers of the Natural History Society of Wisconsin	197	89621	0.707789387
145	African Invertebrates	196	89817	0.709337314
146	Bihang till Kungliga Svenska Vetenskaps-Akademiens Handlingar	194	90011	0.710869445
147	Transactions of the Linnean Society of London	194	90205	0.712401576
148	Hunan Science and Technology Publishing House	193	90398	0.71392581
149	Journal of Afrotropical Zoology	193	90591	0.715450044
150	Muse d'histoire naturelle de Genve	193	90784	0.716974278
151	Records of the Indian Museum, Calcutta	193	90977	0.718498511
152	Annales Historico-Naturales Musei Nationalis Hungarici	192	91169	0.720014847
153	Invertebrate Taxonomy	190	91359	0.721515388
154	KMK Scientific Press	190	91549	0.723015929
155	Abhandlungen des Naturwissenschaftlichen Vereins zu Bremen	187	91736	0.724492778
156	Boletim do Museu Nacional do Rio de Janeiro	183	91919	0.725938036
157	Entomologicheskoe Obozrenie	180	92099	0.727359601
158	Festschrift Embrik Strand	179	92278	0.728773268
159	Hokuryukan	179	92457	0.730186936
160	Rozprawy i Sprawozdania z Posiedzen Wydzialu Matematyczno Przyrodniczego Akademji Umiejetnosci, Krakow	178	92635	0.731592706
161	Bulletin de la Socit d'Histoire Naturelle de Toulouse	177	92812	0.732990578
162	American Arachnological Society	176	92988	0.734380553
163	Mitteilungen der Schweizerischen Entomologischen Gesellschaft	176	93164	0.735770528
164	Atti della Societ Italiana di Scienze Naturali e del Museo Civico di Storia Naturale di Milano	169	93333	0.73710522
165	Journal of the Bombay Natural History Society	168	93501	0.738432014
166	Entomologica Scandinavica	167	93668	0.73975091
167	Moscow, Akaedemia Nauk	164	93832	0.741046114
168	Proceedings of the Biological Society of Washington	164	93996	0.742341318
169	Akademia Nauk SSSR	163	94159	0.743628624
170	Journal of the Linnean Society of London, Zoology	161	94320	0.744900135
171	Irkutsk State University Publishing	160	94480	0.746163749
172	Zeszyty Naukowe Wy?szej Szkoly Rolniczo-Pedagogicznej	160	94640	0.747427362
173	Agriculture Planning Committee of Shanxi Province	159	94799	0.748683078
174	Andrias	159	94958	0.749938794
175	Arachnologische Mitteilungen	158	95116	0.751186612
176	Fragmenta Entomologica	158	95274	0.75243443
177	Mmoires de la Socit Royale des Sciences de Lige	156	95430	0.753666453
178	Bulletin of the National Museum of Nature and Science Tokyo (A)	155	95585	0.754890579
179	Revista del Museo Argentino de Ciencias Naturales Bernardino Rivadavia	153	95738	0.756098909
180	Bulletin of the National Museum of Nature and Science Tokyo	151	95889	0.757291445
181	Paris, Sciences physiques, Zoologie	150	96039	0.758476082
182	Korea Research Institute of Bioscience and Biotechnology (KRIBB)	147	96186	0.759637027
183	Landbuch Verlag	145	96331	0.760782177
184	Danmarks Fauna	144	96475	0.761919429
185	Records of the Western Australian Museum	143	96618	0.763048783
186	Proceedings of the United States National Museum	140	96758	0.764154445
187	Papers of the Michigan Academy of Science, Arts and Letters	139	96897	0.765252209
188	Zoological Survey of India	139	97036	0.766349974
189	Bulletin de la Socit Entomologique de France	138	97174	0.76743984
190	Courier Forschungsinstitut Senckenberg	138	97312	0.768529707
191	Zeitschrift fr die Gesammten Naturwissenschaften	137	97449	0.769611676
192	Texas Agriculture Experiment Station	136	97585	0.770685747
193	Folia Zoologica et Hydrobiologica, Rig?	135	97720	0.771751921
194	Verhandlungen des Naturwissenschaftlichen Vereins in Hamburg	135	97855	0.772818095
195	Zoologiska Bidrag frn Uppsala	134	97989	0.773876371
196	Nova Guinea	129	98118	0.77489516
197	Revista Brasileira de Entomologia	129	98247	0.775913948
198	Spixiana	129	98376	0.776932736
199	Illustrated Fauna and Flora of Korea	128	98504	0.777943627
200	Contributions to Natural History	127	98631	0.77894662
201	Denkschriften der Medizinisch-Naturwissenschaftlichen Gesellschaft zu Jena	126	98757	0.779941716
202	Serket	125	98882	0.780928914
203	Journal of Hunan Teachers College	124	99006	0.781908214
204	Breviora	123	99129	0.782879617
205	Verhandlungen der Naturforschenden Gesellschaft in Basel	122	99251	0.783843122
206	Cornell Univ. Press	121	99372	0.78479873
207	Texas Memorial Museum Speleological Monographs	121	99493	0.785754338
208	Memoirs of the Entomological Society of Canada	120	99613	0.786702048
209	Mem¢rias do Instituto Butantan	120	99733	0.787649758
210	Publica?es Culturais da Companhia de Diamantes de Angola	120	99853	0.788597468
211	Verhandlungen des Naturhistorischen Vereins der Preussischen Rheinlande und Westfalens	120	99973	0.789545178
212	Abhandlungen des Naturwissenschaftlichen Vereins in Hamburg	118	100091	0.790477093
213	Insect Systematics & Evolution	116	100207	0.791393213
214	Monitore Zoologico Italiano	116	100323	0.792309333
215	Fauna of Arabia	115	100438	0.793217555
216	Records of the South Australian Museum	115	100553	0.794125777
217	British Arachnological Society	114	100667	0.795026102
218	Bulletin de l'Institut Royal des Sciences Naturelles de Belgique, Entomologie	114	100781	0.795926426
219	Psyche	113	100894	0.796818853
220	The Raffles Bulletin of Zoology	113	101007	0.79771128
221	Archivos da Escola Superior de Agricultura e Medicina Veterinaria, Rio de Janeiro	112	101119	0.79859581
222	Jahrbcher des Nassauischen Vereins fr Naturkunde	112	101231	0.799480339
223	Sinozoology	112	101343	0.800364868
224	American Midland Naturalist	111	101454	0.8012415
225	Garden City	111	101565	0.802118132
226	P?¡rodov?dn pr ce £stav? ?eskoslovensk Akademie V?d v Brn?	111	101676	0.802994764
227	Proceedings of the Linnean Society of New South Wales	111	101787	0.803871396
228	Tarantulas of the World	111	101898	0.804748028
229	Acta Biologica Venezuelica	110	102008	0.805616762
230	Annals of the Transvaal Museum	110	102118	0.806485496
231	Iheringia	110	102228	0.80735423
232	Abhandlungen der Zoologisch-Botanischen Gesellschaft in Wien	109	102337	0.808215067
233	Faculty of Letters Revue, Otemon Gakuin University	109	102446	0.809075904
234	Acta Societatis Scientiarum Indica-Neerlandica	107	102553	0.809920945
235	Papers and Proceedings of the Royal Society of Tasmania	107	102660	0.810765987
236	Zoologische Mededelingen	107	102767	0.811611028
237	Mem. Qld Mus.-Nature	106	102873	0.812448172
238	Archiv Svazu na V?zkum a Ochranu P?¡rody i Krajiny v Zemi Moravskoslezsk	105	102978	0.813277418
239	Journal of Zoology, London	105	103083	0.814106665
240	New York State Museum Bulletin	104	103187	0.814928014
241	Abhandlungen der Naturforschenden Gesellschaft Grlitz	103	103290	0.815741465
242	Entomologisk Tidskrift	103	103393	0.816554916
243	Transactions of the South African Philosophical Society	102	103495	0.817360469
244	Agricultural Insects, Spiders, Plant Diseases and Weeds of Xizang	101	103596	0.818158125
245	Shaanxi Science and Technology Press	101	103697	0.818955781
246	Israel Academy of Sciences and Humanities	100	103797	0.81974554
247	Bulletin & Annales de la Socit Entomologique de Belgique	99	103896	0.820527401
248	Bulletin Scientifique de la France et de la Belgique	99	103995	0.821309261
249	Proceedings of the Indian Academy Of Science	99	104094	0.822091122
250	Schriften des Naturwissenschaftlichen Vereins fr Schleswig-Holstein	98	104192	0.822865086
251	Phelsuma	97	104289	0.823631151
252	Entomologiska Freningen	96	104385	0.824389319
253	Pacific Insects	96	104481	0.825147487
254	The University of California Publications in Entomology	96	104577	0.825905655
255	Manaaki Whenua Press	94	104671	0.826648028
256	Cladistics	92	104763	0.827374606
257	Jahrbuch der Hamburgischen Wissenschaftlichen Anstalten	92	104855	0.828101184
258	Memoirs of the Zoological Survey of India	92	104947	0.828827762
259	Nieuwsbrief van de Belgische Arachnologische Vereniging	92	105039	0.829554339
260	NRC Research Press	92	105131	0.830280917
261	Acta Zoologica Bulgarica	90	105221	0.8309917
262	Fjlrit N tt£rufraedistofnunar	90	105311	0.831702482
263	Encyclopdie Mthodique, Histoire Naturelle, Insectes, Paris	88	105399	0.83239747
264	Revista de la Sociedad Entomol¢gica Argentina	88	105487	0.833092457
265	Museum Paper, Alabama Museum of Natural History	87	105574	0.833779547
266	Navorsinge van die Nasionale Museum Bloemfontein	87	105661	0.834466637
267	Transactions and Proceedings of the Royal Society of New Zealand	87	105748	0.835153726
268	Peckhamia	86	105834	0.835832919
269	Trudy Zoologieskogo Instituta Akademija Nauk SSSR	86	105920	0.836512111
270	Verffentlichungen des Museum Ferdinandeum in Innsbruck	86	106006	0.837191303
271	Bulletin of the Department of Zoology of the Panjab University	84	106090	0.8378547
272	Missione Biologica Sagan-Omo, Reale Accademia d?Italia, Roma	84	106174	0.838518097
273	Newsletter of the British Arachnological Society	84	106258	0.839181494
274	Revue Franaise d'Entomologie	84	106342	0.839844891
275	Entomologica Basiliensis	83	106425	0.840500391
276	Fauna Romaniei, Arachnida	83	106508	0.84115589
277	Journal of the Institute of Polytechnics Osaka City University	83	106591	0.84181139
278	China Forestry Publishing House	82	106673	0.842458992
279	Taichung Junior Teachers College Publisher	82	106755	0.843106594
280	Acta Zoologica Lilloana	81	106836	0.843746298
281	Arachnological Society of East Asia	81	106917	0.844386002
282	Caucasian Entomological Bulletin	81	106998	0.845025707
283	Nova Acta Academiae Caesareae Leopoldino-Carolinae Germanicae Naturae Curiosorum	81	107079	0.845665411
284	Nova Acta Regiae Societatis Scientiarum Upsaliensis	80	107159	0.846297218
285	Fauna Republicii Socialiste Romnia	79	107238	0.846921127
286	Tropical Zoology	79	107317	0.847545036
287	Arthropoda Selecta, Special Issue	78	107395	0.848161048
288	Frankh-Kosmos Verlag	78	107473	0.848777059
289	Atti della Reale Accademia d'Italia	77	107550	0.849385173
290	Jahreshefte des Vereins fr vaterlndische Naturkunde in Wrttemberg	77	107627	0.849993287
291	Journal of Hebei Normal University	77	107704	0.850601401
292	Wiley Eastern	77	107781	0.851209515
293	Zoosystema	77	107858	0.851817629
294	Entomologische Abhandlungen, Staatliches Museum fr Tierkunde Dresden	76	107934	0.852417845
295	Memorias de la Real Sociedad Espa¤ola de Historia Natural	76	108010	0.853018062
296	Occasional Papers of the Florida State Collection of Arthropods	76	108086	0.853618278
297	Histoire Naturelle	75	108161	0.854210597
298	Journal of the Bethune Medical University	75	108236	0.854802916
299	Broteria	73	108309	0.855379439
300	Mitteilungen aus den Kniglichen Naturwissenschaftlichen Instituten in Sofia	73	108382	0.855955963
301	Zooloogia ja Botaanika Instituut	73	108455	0.856532487
302	Natural History Society of Maryland	72	108527	0.857101113
303	Records of the Albany Museum Grahamstown	72	108599	0.857669739
304	V?stn¡k ?eskoslovensk Zoologick Spole?nosti v Praze	72	108671	0.858238365
305	Vestnik Zoologii	72	108743	0.858806991
306	Slovenska Akademija Znanosti in Umetnosti, Razred za Prirodoslovne Vede, Classis IV, Historia Naturalis	71	108814	0.859367719
307	Zoologie	71	108885	0.859928448
308	Entomological News	70	108955	0.860481279
309	Oriental Insects	70	109025	0.86103411
310	Seoul National Univ.	70	109095	0.861586941
311	The Raffles Bulletin of Zoology, Supplement	70	109165	0.862139771
312	Folia Entomologica Hungarica	69	109234	0.862684705
313	Acta Universitatis Lundensis	68	109302	0.86322174
314	Berliner Entomologische Zeitschrift	68	109370	0.863758776
315	Studies on Neotropical Fauna and Environment	68	109438	0.864295812
316	American Arachnology	67	109505	0.86482495
317	Arthropoda	67	109572	0.865354088
318	Bulletin de la Socit Imperiale des Naturalists de Moscou	67	109639	0.865883226
319	Polska Akad. Nauk	67	109706	0.866412364
320	African Entomology	65	109771	0.866925707
321	Animalia	65	109836	0.86743905
322	Biocincias	65	109901	0.867952393
323	Denisia	65	109966	0.868465736
324	Journal of Entomology and Zoology	65	110031	0.868979079
325	Muse Royal de l'Afrique Central	65	110096	0.869492422
326	Revista Chilena de Historia Natural	65	110161	0.870005765
327	Arquivos do Museu Paranaense	64	110225	0.870511211
328	Bollettino della Societ Entomologica Italiana	64	110289	0.871016656
329	Estudios de "Belen"	64	110353	0.871522101
330	Zeitschrift des Ferdinandeums fr Tirol und Vorarlberg	64	110417	0.872027547
331	Zoologia (Curitiba)	64	110481	0.872532992
332	Acta Universitatis Carolinae Biologica	63	110544	0.87303054
333	Sitzungsberichte der Kaiserlichen Akademie der Wissenschaften, Mathematisch-naturwissenschaftliche Klasse, Wien	63	110607	0.873528088
334	Annalen Zoologische Wetenschappen	62	110669	0.874017738
335	Bulletin de l'Institut Fondamental d'Afrique Noire	62	110731	0.874507388
336	Entomologische Zeitschrift, Frankfurt a.M.	62	110793	0.874997038
337	Journal of the Asiatic Society of Bengal	62	110855	0.875486689
338	Acta Zoologica Hungarica	61	110916	0.875968441
339	Mmoires de Biospologie	61	110977	0.876450194
340	Bollettino dei Musei di Zoologia ed Anatomia Comparata della Reale Universit di Torino	60	111037	0.876924049
341	Bulletin Mensuel de la Socit Linnenne de Lyon	60	111097	0.877397904
342	Die Natur (Wien)	60	111157	0.877871759
343	Ke xue chu ban she	60	111217	0.878345614
344	Museum Senckenbergianum, Abhandlungen aus dem Gebiete der beschreibenden Naturgeschichte	60	111277	0.878819469
345	Saito Ho-On Kai Museum Research Bulletin	60	111337	0.879293324
346	Arachnides	59	111396	0.879759282
347	Memorias del Instituto Nacional de Investigaciones Cientificas	59	111455	0.880225239
348	Bulletin des Institutions Royales d'Histoire Naturelle Sophia	58	111513	0.880683299
349	Sichuan Journal of Zoology	58	111571	0.881141359
350	Academia Republicii Socialiste Romnia	57	111628	0.881591521
351	Entomologiceskie issledovanija v Kirgizii	57	111685	0.882041683
352	Lejiegod Zoologicheskii Instituta Muzeya Akademii Nauk SSSR St. Petersburg	57	111742	0.882491846
353	Pamietnik Akademji umiejetnosci w Krakow wydzial matematyczno-przyrodniczy	57	111799	0.882942008
354	Fauna Polski	56	111855	0.883384273
355	Journal of the Faculty of Agriculture Kyushu University	56	111911	0.883826537
356	fversigt af Kongliga Vetenskaps-Akademiens Frhandlingar	56	111967	0.884268802
357	Tasmanian Museum and Art Gallery	56	112023	0.884711067
358	Albrecht Philler Verlag	55	112078	0.885145434
359	Chongqing Publishing House	55	112133	0.885579801
360	Cultural	55	112188	0.886014168
361	Zoological Studies	55	112243	0.886448535
362	Bulletin of the Texas Memorial Museum	53	112296	0.886867107
363	Journal of the Faculty of Agriculture, Hokkaido Imperial University, Sapporo, Japan	53	112349	0.887285679
364	Proceedings of the Entomological Society of Washington	53	112402	0.887704251
365	Quaderni del Museo di Speleologia "V. Rivera"	53	112455	0.888122823
366	Transactions of the Natural History Society of Northumberland	53	112508	0.888541395
367	Abhandlungen der Naturhistorischen Gesellschaft zu Nrnberg	52	112560	0.88895207
368	Annalen des Naturhistorischen Museums in Wien	52	112612	0.889362744
369	Bulletin de la Socit Fouad 1<sup>er</sup> d'Entomologie	52	112664	0.889773418
370	Ejnar Munksgaard	52	112716	0.890184093
371	Meddr Gr&oslash;nland	52	112768	0.890594767
372	Quaderno, Accademia Nazionale dei Lincei	52	112820	0.891005441
373	Travaux de l?Institut de Spologie ?mile Racovitza?	52	112872	0.891416116
374	Berichte der Biologischen Sáwasserstation der Kaiserlichen Naturforschergesellschaft zu St. Petersburg	51	112923	0.891818893
375	Mygalomorph	51	112974	0.892221669
376	Nyt Magazin for Naturvidenskaberne	51	113025	0.892624446
377	Records of the Western Australian Museum, Supplement	51	113076	0.893027223
378	Sitzungsberichte der Gesellschaft Naturforschender Freunde zu Berlin	51	113127	0.89343
379	Esakia	50	113177	0.893824879
380	National Science Museum	50	113227	0.894219758
381	Revista Brasileira de Biologia	50	113277	0.894614637
382	University of Perm	50	113327	0.895009517
383	Canadian Journal of Zoology	49	113376	0.895396498
384	Memoirs of the National Science Museum Tokyo	49	113425	0.89578348
385	New Zealand Journal of Zoology	49	113474	0.896170461
386	Opera Lilloana	49	113523	0.896557443
387	Transactions of the American Entomological Society	49	113572	0.896944425
388	European Journal of Taxonomy	48	113620	0.897323509
389	Journal of the Quekett Microscopical Club	48	113668	0.897702593
390	Memoirs of the California Academy of Sciences	48	113716	0.898081677
391	Proceedings of the Royal Society of Victoria	48	113764	0.898460761
392	Revista de Biolog¡a Tropical	48	113812	0.898839845
393	Mmoiresÿdeÿl'AcadmieÿdesÿSciences de Paris	47	113859	0.899211031
394	Papis Avulsos do Departamento de Zoologia, Secretaria de Agricultura, Sao Paolo	47	113906	0.899582218
395	Proceedings of the 6<sup>th</sup> International Arachnological Congress	47	113953	0.899953404
396	Quelle & Meyer	47	114000	0.900324591
397	Redia	47	114047	0.900695777
398	Sitzungsberichte und Abhandlungen der Naturwissenschaftlichen Gesellschaft Isis in Dresden	47	114094	0.901066964
399	The Pan-Pacific Entomologist	47	114141	0.90143815
400	London and Edinburgh Philosophical Magazine and Journal of Science	46	114187	0.901801439
401	Mmoires du Muse Royal d'Histoire Naturelle de Belgique	46	114233	0.902164728
402	Norsk Entomologisk Tidsskrift	46	114279	0.902528017
403	Poeyana	46	114325	0.902891306
404	Anales de Agricultura de la Rep£blica Argentina	45	114370	0.903246697
405	Arachnologischer Anzeiger	45	114415	0.903602088
406	Munis Entomology and Zoology	45	114460	0.903957479
407	Nachrichten der Gesellschaft der Freunde der Naturwissenschaften zu Moskau	45	114505	0.904312871
408	Transactions of the Sapporo Natural History Society	45	114550	0.904668262
409	Zapiski Imperatorskoi Akademy Naouk St. Petersburg	45	114595	0.905023653
410	Zeitschrift fr die Gesammten Naturwissenschaften, Dritte Folge	45	114640	0.905379045
411	Annales Academi Scientiarum Fennicae	44	114684	0.905726538
412	Biologisch Jaarboek Dodonaea	44	114728	0.906074032
413	Boletim do Museu Paraense Em¡lio Goeldi	44	114772	0.906421526
414	Bulletin de l'Acadmie impriale des sciences de St.-Ptersbourg	44	114816	0.906769019
415	Journal of Agricultural Science Tokyo Nogyo Daigaku	44	114860	0.907116513
416	Journal of Morphology	44	114904	0.907464007
417	USSR Academy of Sciences, Institute of Biological Problems of the North	44	114948	0.9078115
418	Zoologische Jahrbcher	44	114992	0.908158994
419	Bulletin of the Wisconsin Natural History Society	43	115035	0.90849859
420	Ed. Univ. Perm	43	115078	0.908838186
421	Arquivos de Zoologia do Estado de Sao Paulo	42	115120	0.909169885
422	Bolet¡n de la Sociedad Entomol¢gica de Espa¤a	42	115162	0.909501583
423	Journal of the Washington Academy of Sciences	42	115204	0.909833282
424	Sitzungsberichte der sterreichischen Akademie der Wissenschaften	42	115246	0.910164981
425	Tethys Entomological Research	42	115288	0.910496679
426	Znanie Press	42	115330	0.910828378
427	British Tarantula Society Journal	41	115371	0.911152179
428	Entomology Memoir, Department of Agriculture Republic of South Africa	41	115412	0.911475979
429	Izvestija Estedvenno-Nauchnogo Instituta pri Molotovskom Gosudarstvennom Universitete imeni M. Gor'kogo	41	115453	0.91179978
430	Journal of Natural Science of Hunan Normal University	41	115494	0.912123581
431	Bulletin du Muse Royal d'Histoire Naturelle de Belgique	40	115534	0.912439485
432	Bulletin, Agricultural Experiment Station, University of Arkansas	40	115574	0.912755388
433	Bulletin, United States National Museum	40	115614	0.913071291
434	Fauna Saudi Arabia	40	115654	0.913387195
435	Hunan Press of Science and Technology	40	115694	0.913703098
436	Pacific Insects Monographs	40	115734	0.914019002
437	Phytophylactica	40	115774	0.914334905
438	Records of the Zoological Survey of India, Miscellaneous Publications, Occasional Paper	40	115814	0.914650808
439	Verhandlungen der Deutschen Zoologischen Gesellschaft	40	115854	0.914966712
440	Wy?sza Szkola Rolniczo-Pedagogiczna W Siedlcach Rozprawa Naukowa	40	115894	0.915282615
441	Zeitschrift fr Naturwissenschaften	40	115934	0.915598518
442	Akademii Nauk SSSR	39	115973	0.915906524
443	Bernice P. Bishop Museum Bulletin	39	116012	0.91621453
444	Bulletin de la Socit d'Histoire Naturelle d'Afrique du Nord	39	116051	0.916522536
445	?asopis ?eskoslovensk Spole?nosti Entomologick	39	116090	0.916830542
446	Heptathela	39	116129	0.917138547
447	Korean Journal of Systematic Zoology	39	116168	0.917446553
448	Mmoires Couronns et Mmoires des Savants trangers de l'Acadmie Royale des Sciences, des Lettres et des Beaux-Arts de Belgique	39	116207	0.917754559
449	Memoirs of the Cornell University Agricultural Experiment Station	39	116246	0.918062565
450	Sonoda Women's College Studies	39	116285	0.91837057
451	Journal of Hebei University, Natural Science Edition	38	116323	0.918670679
452	Journal of the Entomological Society of South Africa	38	116361	0.918970787
453	Yemeni-German Plant Protection Project	38	116399	0.919270895
454	Zoologist	38	116437	0.919571003
455	Entomon	37	116474	0.919863214
456	Spisani na Beulgarskata Akademia na Naoukite	37	116511	0.920155424
457	Studii ?i Cercet?ride Biologie	37	116548	0.920447635
458	Japan International Cooperation Agency Project Publication	36	116584	0.920731948
459	Journal of Norman Bethune University of Medical Sciences	35	116619	0.921008364
460	Ministerstvo prosveshcheniya RSFSR	35	116654	0.921284779
461	Mitteilungen aus dem Naturhistorischen Museum in Hamburg	35	116689	0.921561194
462	Natuurkundig Tijdschrift voor Nederlandsch-Indie	35	116724	0.92183761
463	Pr ce Moravsk P?¡rodov?deck Spole?nosti	35	116759	0.922114025
464	Proceedings of the Linnean Society of London	35	116794	0.922390441
465	Publica?es do Instituto Zoologia Doutor Augusto Nobre	35	116829	0.922666856
466	Reale Accademia d'Italia	35	116864	0.922943272
467	Uchenye Zapiski Kalininskogo Gosudarstvennogo Pedagogicheskogo Instituta	35	116899	0.923219687
468	Acta Scientiarum Naturalium Universitatis Normalis Hunanensis	34	116933	0.923488205
469	Acta Zoologica Bulgarica Supplement	34	116967	0.923756723
470	Archives des Sciences, Genve	34	117001	0.924025241
471	Bulletin de la Socit des Sciences Naturelles du Maroc	34	117035	0.924293759
472	Fauna of New Zealand	34	117069	0.924562276
473	Linzer Biologische Beitrge	34	117103	0.924830794
474	Memorias e Estudos do Museu Zoologico da Universidade de Coimbra	34	117137	0.925099312
475	Memorie del Museo Civico di Storia Naturale di Verona	34	117171	0.92536783
476	Ohio Biological Survey Notes	34	117205	0.925636348
477	Rsultats des Expditions Biospologiques Cubano-Roumaines Cuba	34	117239	0.925904866
478	Videnskabelige Meddelelser fra Dansk Naturhistorisk Forening i Kj?benhavn	34	117273	0.926173384
479	Zeitschrift fr Wissenschaftliche Zoologie	34	117307	0.926441901
480	Annalen des Kaiserlich-Kniglichen Naturhistorischen Hofmuseums in Wien	33	117340	0.926702522
481	Archives de l'Institut Grand-Ducal de Luxembourg	33	117373	0.926963142
482	Arquivos de Zoologia	33	117406	0.927223762
483	Belgian Journal of Zoology	33	117439	0.927484383
484	Dar Al Ummah	33	117472	0.927745003
485	Faune Madagascar	33	117505	0.928005623
486	Florida Entomologist	33	117538	0.928266243
487	Journal of the Assam Science Society	33	117571	0.928526864
488	Mmoires de l'Acadmie Impriale des Sciences de Petrograd	33	117604	0.928787484
489	Memoranda Societatis pro Fauna et Flora Fennica	33	117637	0.929048104
490	Physis, Revista de la Sociedad Argentina de Ciencias Naturales, Secci¢n C	33	117670	0.929308724
491	Zoological Systematics	33	117703	0.929569345
492	Cimbebasia	32	117735	0.929822067
493	Entomologica Scandinavica, Supplement	32	117767	0.93007479
494	Izvestiya na Tsarskite Prirodonauchni Instituti v Sofia	32	117799	0.930327513
495	Journal of the Huizhou Teachers College	32	117831	0.930580236
496	Notas del Museo de la Plata	32	117863	0.930832958
497	Ohio Journal of Science	32	117895	0.931085681
498	Travaux de l'Institut Scientifique Chrifien et de la Facult des Sciences, Srie Zoologie, Rabat	32	117927	0.931338404
499	Bolet¡n de la Asociaci¢n Espa¤ola de Entomolog¡a	31	117958	0.931583229
500	Journal of the Elisha Mitchell Scientific Society	31	117989	0.931828054
501	Molecular Phylogenetics and Evolution	31	118020	0.932072879
502	Osaka Arachnologists' Group	31	118051	0.932317704
503	Verhandlungen, VII. Internationaler Kongress fr Entomologie, Berlin	31	118082	0.932562529
504	Wy?sza Szkola Rolniczo-Pedagogiczna W Siedlcach	31	118113	0.932807354
505	Atti della Societ Toscana di Scienze Naturali	30	118143	0.933044282
506	Bulletin of the Zoological Survey of India	30	118173	0.933281209
507	Eos	30	118203	0.933518137
508	Insecta Mundi	30	118233	0.933755064
509	Pakistan Journal of Zoology	30	118263	0.933991992
510	Publicaciones Ocasionales del Museo Nacional de Historia Natural, Santiago	30	118293	0.934228919
511	Zoology in the Middle East	30	118323	0.934465847
512	Acta Zoologica Academiae Scientiarum Hungaricae	29	118352	0.934694877
513	Annali del Museo Civico di Storia Naturale Giacomo Doria	29	118381	0.934923907
514	Eurasian Entomological Journal	29	118410	0.935152937
515	Mmoires de l'Institut Franais d'Afrique Noire	29	118439	0.935381967
516	National Taiwan Normal University	29	118468	0.935610997
517	Research Review of Kyungpook National University	29	118497	0.935840027
518	Transactions of the Entomological Society of London	29	118526	0.936069056
519	Uchenye Zapiski, Molotovskii Gosudarstvennyj Universitet Imeni A. M. Gorkogo	29	118555	0.936298086
520	Zoologica (New York)	29	118584	0.936527116
521	Educational Journal of the Teacher's College Kyungpook National University	28	118612	0.936748249
522	Journal of the Institute of Natural Sciences, Keimyung University	28	118640	0.936969381
523	Symposia of the Zoological Society of London	28	118668	0.937190513
524	Tuhinga	28	118696	0.937411646
525	Turkish Journal of Zoology	28	118724	0.937632778
526	Atti dell' Accademia Gioenia di Scienze Naturali in Catania	27	118751	0.937846013
527	Burke Museum Contributions in Anthropology and Natural History	27	118778	0.938059248
528	Comunicaciones del Museo Argentino de Ciencias Naturales "Bernardino Rivadavia"	27	118805	0.938272482
529	Occasional Papers of the California Academy of Sciences	27	118832	0.938485717
530	Pacific Science	27	118859	0.938698952
531	Proceedings of the Washington Academy of Sciences	27	118886	0.938912187
532	Actas Congreso Ibrico de Entomolog¡a, Le¢n	26	118912	0.939117524
533	Annals of the New York Academy of Science	26	118938	0.939322861
534	Biota Neotropica	26	118964	0.939528198
535	Bolet¡n de la Sociedad Entomologica Aragonesa	26	118990	0.939733536
536	Bulletin of the U. S. Geological Survey	26	119016	0.939938873
537	Field and Laboratory	26	119042	0.94014421
538	Literary Department Review, Otemon Gakuin University, Osaka	26	119068	0.940349547
539	The Central Mediterranean Naturalist	26	119094	0.940554884
540	Transactions of the Northern Naturalists' Union	26	119120	0.940760221
541	Annales de Splologie	25	119145	0.940957661
542	Arthropod Systematics & Phylogeny	25	119170	0.941155101
543	Bulletin of the Biogeographical Society of Japan	25	119195	0.94135254
544	Journal of Threatened Taxa	25	119220	0.94154998
545	Lo?ki Razgledi	25	119245	0.941747419
546	Miscellanea Zoologica	25	119270	0.941944859
547	Steenstrupia	25	119295	0.942142299
548	University of Washington Publications in Biology	25	119320	0.942339738
549	Videnskabelige Meddelelser fra den Naturhistoriske Forening i Kj?benhavn	25	119345	0.942537178
550	Zoological Catalogue of Australia	25	119370	0.942734617
551	Archiv for Mathematik og Naturvidenskab Christiania	24	119394	0.942924159
552	Entomologick Listy, Brno	24	119418	0.943113702
553	Koedoe	24	119442	0.943303244
554	Lavori della Societ Veneziana di Scienze Naturali	24	119466	0.943492786
555	Mittheilungen des Mnchener Entomologischen Vereins	24	119490	0.943682328
556	Opuscula Zoologica Instituti Zoosystematici et Oecologici Universitatis Budapestinensis	24	119514	0.94387187
557	Proceedings of the Japanese Society of Systematic Zoology	24	119538	0.944061412
558	Archives Entomologiques de M. J. Thomson	23	119561	0.944243056
559	Archivio Zoologico Italiano	23	119584	0.9444247
560	Archivos do Instituto Vital Brazil	23	119607	0.944606345
561	Bollettino del Museo Civico di Storia Naturale di Venezia	23	119630	0.944787989
562	Bulletin de la Socit Royale Belge d'Entomologie	23	119653	0.944969634
563	Dongwuxue zazhi (Chinese Journal of Zoology)	23	119676	0.945151278
564	Entomologist's Monthly Magazine	23	119699	0.945332923
565	Fragmenta Faunistica, Warsaw	23	119722	0.945514567
566	Indian Journal of Arachnology	23	119745	0.945696212
567	Journal of the Speleological Society of Japan	23	119768	0.945877856
568	Kishidaia	23	119791	0.9460595
569	Mitteilungen des Internationalen Entomologischen Vereins	23	119814	0.946241145
570	Museo Regionale Scienze Naturali Monografie 47	23	119837	0.946422789
571	Proceedings of the Ninth International Congress of Arachnology, Panama 1983	23	119860	0.946604434
572	Suomalaisen Elin-ja Kasvitieteellisen Seuran Vanamon Tiedonannot (Archivum Societatis Zoologicae Botanicae Fennicae "Vanamo")	23	119883	0.946786078
573	Arquivos do Instituto Biol¢gico, Sao Paolo	22	119905	0.946959825
574	Atti della Societ Veneto-Trentina di Scienze Naturali, Padova	22	119927	0.947133572
575	Jacaranda Press	22	119949	0.947307319
576	Korean Journal of Plant Protection	22	119971	0.947481066
577	Mitteilungen ber Hhlen- und Karstforschung	22	119993	0.947654812
578	Museum Paper, Geological Survey of Alabama	22	120015	0.947828559
579	PLoS One	22	120037	0.948002306
580	Revue et Magasin de Zoologie Pure et Applique	22	120059	0.948176053
581	Separate, published by P. A. Norstedt & Sner	22	120081	0.9483498
582	Sibirskij Biologichesky Zhurnal	22	120103	0.948523547
583	Solenodon	22	120125	0.948697293
584	Stuttgarter Beitrge zur Naturkunde	22	120147	0.94887104
585	Turkish Journal of Arachnology	22	120169	0.949044787
586	Zeitschrift fr Zoologische Systematik und Evolutionsforschung	22	120191	0.949218534
587	Acta Zoologica Sinica	21	120212	0.949384383
588	Agropromizat	21	120233	0.949550233
589	Bulletin de la Socit Scientifique de Bretagne	21	120254	0.949716082
590	Entomological Research	21	120275	0.949881931
591	Journal of Jilin Medical University	21	120296	0.95004778
592	Journal of the Guangxi Agricultural College	21	120317	0.95021363
593	Korean Journal of Zoology	21	120338	0.950379479
594	Mmoires de l'Acadmie des Sciences de l'Institut de France	21	120359	0.950545328
595	Mmoires du Musum d'Histoire Naturelle de Paris	21	120380	0.950711177
596	Memoirs of the National Museum of Nature and Science Tokyo	21	120401	0.950877027
597	Nouveau Dictionnaire d'Histoire Naturelle, Paris	21	120422	0.951042876
598	Proceedings of the Entomological Society of Ontario	21	120443	0.951208725
599	Proceedings of the Royal Irish Academy	21	120464	0.951374575
600	Published by the authors	21	120485	0.951540424
601	Transactions and Proceedings of the Royal Society of South Australia	21	120506	0.951706273
602	Zashita Rastenii	21	120527	0.951872122
603	Acta Entomologica Bohemoslovaca	20	120547	0.952030074
604	Acta Universitatis Purkynianae Studia Biologica	20	120567	0.952188026
605	Anales del Museo Nacional de Historia Natural de Buenos Aires	20	120587	0.952345977
606	Boletim do Museu Municipal do Funchal	20	120607	0.952503929
607	Bollettino del Museo Civico di Storia Naturale di Verona	20	120627	0.952661881
608	Calodema	20	120647	0.952819832
609	Dugesiana	20	120667	0.952977784
610	Ergebnisse des Forschungsunternehmens Nepal Himalaya	20	120687	0.953135736
611	Gewsser Abwsser	20	120707	0.953293687
612	Jahrbuch der Kaiserlich-Kniglichen Gelehrten Gesellschaft in Krakau	20	120727	0.953451639
613	Journal of the Federated Malay States Museums	20	120747	0.953609591
614	Meddelelser om Gr?nland	20	120767	0.953767543
615	Memorias de la Sociedad Cubana de Historia Natural "Felipe Poey"	20	120787	0.953925494
616	Neue Denkschriften der Schweizerischen Naturforschenden Gesellschaft	20	120807	0.954083446
617	Polskie Pismo Entomologiczne	20	120827	0.954241398
618	Prirodoslovne Razprave	20	120847	0.954399349
619	Proceedings of the Natural History Society of Wisconsin	20	120867	0.954557301
620	Proceedings of the Zoological Institute of the Russian Academy of Sciences	20	120887	0.954715253
621	Przegl?d Zoologiczny	20	120907	0.954873204
622	Revista Mexicana de Biodiversidad	20	120927	0.955031156
623	Systematics and Biodiversity	20	120947	0.955189108
624	Taxa, Proceedings of the Japanese Society of Systematic Zoology	20	120967	0.955347059
625	Transactions of the Zoological Society of London	20	120987	0.955505011
626	American Naturalist	19	121006	0.955655065
627	Annales Gnrales des Sciences Physiques	19	121025	0.955805119
628	Annotationes Zoologicae Japonenses	19	121044	0.955955173
629	Bonner Zoologische Beitrge	19	121063	0.956105227
630	Brenesia	19	121082	0.956255282
631	Carinthia II	19	121101	0.956405336
632	Congrs International de Splologie	19	121120	0.95655539
633	Deutsche Entomologische Zeitschrift	19	121139	0.956705444
634	Journal of Hubei University, Natural Science Edition	19	121158	0.956855498
635	Journal of Inner Mongolia Teacher's University	19	121177	0.957005552
636	Journal of the August 1<sup>st</sup> Agricultural College	19	121196	0.957155606
637	Journal of Xinjiang University	19	121215	0.95730566
638	Mitteilungen aus dem Museum fr Naturkunde in Berlin, Zoologische Reihe	19	121234	0.957455714
639	Organisms Diversity & Evolution	19	121253	0.957605768
640	Transactions of the Royal Society of South Australia	19	121272	0.957755822
641	Archivi per la Zoologia Anatomia e Fisiologia Bologna	18	121290	0.957897979
642	Arnoldia Zimbabwe	18	121308	0.958040136
643	Bulletin of the Akiyoshi-dai Museum of Natural History	18	121326	0.958182292
644	Comunicari de zoologie, Societatea de ?tiin?e Biologice din Republica Socialista Romnia,Bucure?ti	18	121344	0.958324449
645	Journal of the British Tarantula Society	18	121362	0.958466605
646	Plant Protection Research Institute Handbook	18	121380	0.958608762
647	P?¡rodov?deck? Sborn¡k Ostravskho Kraje	18	121398	0.958750918
648	Report of the First Scientific Expedition to Manchoukuo	18	121416	0.958893075
649	Shokubutsu Boeki	18	121434	0.959035231
650	Spined, Nieuwsbrief Spinnenwerkgroep Nederland	18	121452	0.959177388
651	2. Zoology	17	121469	0.959311647
652	Acta Scientiarum Naturalium Universitatis Intramongolicae	17	121486	0.959445905
653	Acta Universitatis Latviensis	17	121503	0.959580164
654	Boletim da Sociedade Portuguesa de Ciencias Naturais	17	121520	0.959714423
655	Boletin de la Sociedad de Biologia de Concepcion	17	121537	0.959848682
656	Institute of Zoology, Bulgarian Academy of Sciences Monographs	17	121554	0.959982941
657	Nemouria, Occasional Papers of the Delaware Museum of Natural History	17	121571	0.9601172
658	Oxford University Press	17	121588	0.960251459
659	Pirineos	17	121605	0.960385718
660	Rendiconti, Istituto Lombardo di Scienze e Lettere	17	121622	0.960519977
661	Soobshcheniia Akademii Nauk Gruzinskoi SSR	17	121639	0.960654236
662	Technische Universitt Berlin Dokumentation Kongresse und Tagungen	17	121656	0.960788495
663	Termsztrajzi Fzetek	17	121673	0.960922754
664	The Canadian Field-Naturalist	17	121690	0.961057013
665	Travaux du Musum National d?Histoire Naturelle ?Grigore Antipa?	17	121707	0.961191272
666	Trudy Pechoro-Ilycheskogo Gosudarstvennogo Zapovednika	17	121724	0.961325531
667	Annales des Sciences Naturelles, Zoologie, Paris	16	121740	0.961451892
668	Asia Life Sciences	16	121756	0.961578253
669	Beitrge zur Entomologie	16	121772	0.961704615
670	Cahiers Muse des Confluences - tudes scientifiques	16	121788	0.961830976
671	Commentationes Biologicae	16	121804	0.961957337
672	Entomologische Berichten, Amsterdam	16	121820	0.962083699
673	Evolution	16	121836	0.96221006
674	International Journal of Speleology	16	121852	0.962336421
675	Journal of African Zoology	16	121868	0.962462783
676	Journal of Hebei Pedagogic College	16	121884	0.962589144
677	Journal of Shadong University	16	121900	0.962715505
678	Mmoires de la Socit Zoologique de France	16	121916	0.962841867
679	Memoirs of the Education Institute for Private Schools in Japan, Hachioji-shi, Tokyo	16	121932	0.962968228
680	Naturalist	16	121948	0.963094589
681	Notiziario del Circolo Speleologico Romano	16	121964	0.963220951
682	Occasional Papers of the Bernice P. Bishop Museum	16	121980	0.963347312
683	Proceedings of the Royal Physical Society of Edinburgh	16	121996	0.963473673
684	Proceedings, 8. Internationaler Arachnologen-Kongress Wien 1980	16	122012	0.963600035
685	Publications, Carnegie Institution of Washington	16	122028	0.963726396
686	Revista de Agricultura, Piracicaba	16	122044	0.963852757
687	Supplementa Entomologica	16	122060	0.963979119
688	Theses collection of Kyungpook University	16	122076	0.96410548
689	Zoo's Print Journal	16	122092	0.964231841
690	Aarhus University Press	15	122107	0.964350305
691	Acta Zoologica, Stockholm	15	122122	0.964468769
692	Animal Biology	15	122137	0.964587233
693	Annuario della Societ dei Naturalisti in Modena	15	122152	0.964705697
694	Edaphologia	15	122167	0.96482416
695	Entomologica Americana	15	122182	0.964942624
696	Entomologica Germanica	15	122197	0.965061088
697	Estaci¢n Central Agron¢mica de Cuba, Second Report.	15	122212	0.965179552
698	Gayana	15	122227	0.965298015
699	Genetica	15	122242	0.965416479
700	Iowa State College Journal of Science	15	122257	0.965534943
701	Japan Scientific Societies Press	15	122272	0.965653407
702	Journal and Proceedings of the Royal Society of Western Australia	15	122287	0.96577187
703	Journal of Lanzhou University Natural Sciences	15	122302	0.965890334
704	Journal of the Australian Entomological Society	15	122317	0.966008798
705	Katalog Fauny Polski	15	122332	0.966127262
706	Monatsberichte der Kniglich Preussischen Akademie der Wissenschaften zu Berlin	15	122347	0.966245725
707	Publicaciones del Departamento de Zoolog¡a, Universidad de Barcelona	15	122362	0.966364189
708	Records of the Dominion Museum, Wellington	15	122377	0.966482653
709	Science and Culture	15	122392	0.966601117
710	Transactions and Annual Report of the "Nottingham Naturalists' Society"	15	122407	0.96671958
711	Actas y Memories des Primer Congreso de Naturalistas Espanoles	14	122421	0.966830147
712	Annotationes Zoologicae et Botanicae Bratislava	14	122435	0.966940713
713	Atti del Museo Civico di Storia Naturale di Trieste	14	122449	0.967051279
714	Bolet¡n de la Real Sociedad Espa¤ola de Historia Natural (Seccion Biologica)	14	122463	0.967161845
715	Denkschrift der Akademie der Wissenschaften in Wien	14	122477	0.967272411
716	Entomologiske Meddelelser	14	122491	0.967382978
717	Iranian Journal of Animal Biosystematics	14	122505	0.967493544
718	Mikrokosmos	14	122519	0.96760411
719	Monografias, Instituto Butantan	14	122533	0.967714676
720	Natural Enemies of Insects	14	122547	0.967825242
721	Records of the Auckland Institute and Museum	14	122561	0.967935808
722	Revista de Biologia e Hygiene, Sao Paolo	14	122575	0.968046375
723	Revista Peruana de Biolog¡a	14	122589	0.968156941
724	The New York Entomological Society	14	122603	0.968267507
725	Uchenye Zapiski, Permskij Ordena Trudovogo Krasnogo Znameni Gosudarstvennyj Universitet Imeni A. M. Gorkogo	14	122617	0.968378073
726	Zoosystematica Rossica	14	122631	0.968488639
727	Abhandlungen und Berichte des Kniglich-Zoologischen und Anthropologisch-Ethnografischen Museums zu Dresden	13	122644	0.968591308
728	Actas X Congreso Internacional de Aracnologia. Barcelona	13	122657	0.968693977
729	Annuario dell'Istituto e Museo di Zoologia dell'Universita di Napoli	13	122670	0.968796645
730	Atti e Memorie, Commissione Grotte "Eugenio Boegan"	13	122683	0.968899314
731	Bollettino delle sedute della Accademia Gioenia di Scienze Naturali in Catania	13	122696	0.969001982
732	Bulletin of the Higashi Taisetsu Museum of Natural History	13	122709	0.969104651
733	Comunicaciones Zoologicas del Museo de Historia Natural de Montevideo	13	122722	0.969207319
734	Decheniana	13	122735	0.969309988
735	Ekol¢gia (Bratislava)	13	122748	0.969412657
736	Entomologica Fennica	13	122761	0.969515325
737	Essex Naturalist, London	13	122774	0.969617994
738	Faunistische Abhandlungen, Staatliches Museum fr Tierkunde Dresden	13	122787	0.969720662
739	Guizhou People's Publishing House	13	122800	0.969823331
740	Indo-Malayan Zoology	13	122813	0.969926
741	Insects Micronesia	13	122826	0.970028668
742	Izwestia Biologitschieskogo naoutschno-Issliedowatielskogo Institouta pri Permskom Ouniwersitete	13	122839	0.970131337
743	Memoirs of the National Science Museum Tokyo, Series A, Zoology	13	122852	0.970234005
744	Memoirs of the Queensland Museum, Nature	13	122865	0.970336674
745	Miscellaneous Reports of the Research Institute for Natural Resources Tokyo	13	122878	0.970439343
746	Mitteilungen der Naturforschenden Gesellschaft Schaffhausen	13	122891	0.970542011
747	Neotropica	13	122904	0.97064468
748	Norwegian Journal of Entomology	13	122917	0.970747348
749	Ocrotirea naturii ?i mediului inconjurator, Bucure?ti	13	122930	0.970850017
750	Quaestiones entomologicae	13	122943	0.970952686
751	Sitzungsberichte der Gesellschaft zur Befrderung der Gesamten Naturwissenschaften zu Marburg	13	122956	0.971055354
752	Special Bulletin of the Liverpool Museum	13	122969	0.971158023
753	Transactions of the Royal Society of South Africa	13	122982	0.971260691
754	Abhandlungen und Verhandlungen des Naturwissenschaftlichen Vereins in Hamburg	12	122994	0.971355462
755	Australian Entomological Magazine	12	123006	0.971450233
756	Australian Entomological Society Miscellaneous Publication	12	123018	0.971545004
757	Australian Museum Memoirs	12	123030	0.971639775
758	Author's publication	12	123042	0.971734546
759	BioFormosa	12	123054	0.971829317
760	Bulletin of the British Spider Study Group	12	123066	0.971924088
761	Calanus	12	123078	0.972018859
762	Educational Journal Kyungpook University Korea	12	123090	0.97211363
763	Entomological Problems	12	123102	0.972208401
764	Fragmenta Faunistica Hungarica	12	123114	0.972303172
765	Izvestiya Akademii Nauk Turkmenskoi SSR Seriya Biologicheskikh Nauk	12	123126	0.972397943
766	Memorie di Biogeografia Adriatica	12	123138	0.972492714
767	Mushi	12	123150	0.972587485
768	Papis Avulsos de Zoologia, Sao Paolo	12	123162	0.972682256
769	Pr¡rodovedeck Fakulta Univerzity Komenskh¢	12	123174	0.972777028
770	Quaderni di Speleologia, Circolo Speleologico Romano	12	123186	0.972871799
771	Revista Peruana de Entomolog¡a Agricola	12	123198	0.97296657
772	Sborn¡k Entomologickho Odd?len¡ N rodn¡ho Musea v Praze	12	123210	0.973061341
773	Shaanxi Prov. zool. Assoc. Dissert. Anthol.	12	123222	0.973156112
774	Sociedad Entomol¢gica Argentina	12	123234	0.973250883
775	Species Diversity	12	123246	0.973345654
776	Sswasserfauna von Mitteleuropa	12	123258	0.973440425
777	Systematic Entomology	12	123270	0.973535196
778	The Philippine Entomologist	12	123282	0.973629967
779	Theses Collection of the Graduate School of Education of Kyungpook National University	12	123294	0.973724738
780	Zapiski Biologhitscheskoi Stantzii Obtchiestwa Lioubitelei Iestiestwoznania, Antropologhii i Etnografii w Boltchewie Moskowskoi Goubernii	12	123306	0.973819509
781	Zoological Research	12	123318	0.97391428
782	Acta Zoologica Mexicana	11	123329	0.974001153
783	Actas y Trabajos del Congreso Sudamericano de Zoologia, La Plata	11	123340	0.974088026
784	Annales de la Socit d'Histoire Naturelle de Toulon	11	123351	0.9741749
785	C.S.S.A.R.	11	123362	0.974261773
786	Caribbean Journal of Science	11	123373	0.974348647
787	Current Science	11	123384	0.97443552
788	Fauna hipogea y hemied fica de Venezuela y de otros paises de Amrica del Sur	11	123395	0.974522394
789	Journal of Agriculture of the University of Puerto Rico	11	123406	0.974609267
790	Journal of Biology, Osaka City University	11	123417	0.97469614
791	Journal of Hunan Normal University, Natural Sciences	11	123428	0.974783014
792	Journal of the Hangzhou Normal College	11	123439	0.974869887
793	Kagaku-sekai	11	123450	0.974956761
794	Life Science Research	11	123461	0.975043634
795	Notes biospologiques	11	123472	0.975130508
796	Occasional Papers of the Museum Texas Tech University	11	123483	0.975217381
797	Revue Suisse de Zoologie, Volume Hors Srie	11	123494	0.975304254
798	Sborn¡k Klubu P?¡rodov?deckho v Brn?	11	123505	0.975391128
799	Smithsonian Miscellaneous Collections	11	123516	0.975478001
800	State Fauna Series 3: Fauna of West Bengal	11	123527	0.975564875
801	Studii ?i Comunic?ri Muzeul Brukenthal, ?tiin ?e Naturale	11	123538	0.975651748
802	Uppsala, Zoologi, Arachnida	11	123549	0.975738622
803	Verffentlichungen aus dem Deutschen Kolonial- und bersee-Museum Bremen	11	123560	0.975825495
804	Acta Musei Moraviae, Scientiae Biologicae	10	123570	0.975904471
805	Acta Societatis Zoologicae Bohemicae	10	123580	0.975983447
806	Acta Zoologica Cracoviensia	10	123590	0.976062423
807	Anales del Museo Argentino de Ciencias Naturales	10	123600	0.976141398
808	BioScriba	10	123610	0.976220374
809	Boletim Biol¢gico Sao Paulo	10	123620	0.97629935
810	Bollettino del Laboratorio di Zoologia Generale e Agraria della R. Scuola Superiore d'Agricoltura in Portici	10	123630	0.976378326
811	Buletinul Facultatii de Stiinte din Cernauti	10	123640	0.976457302
812	Bulletin de la Societ des Sciences Naturelles, Venette-Compigne	10	123650	0.976536278
813	Bulletin of the Brooklyn Entomological Society	10	123660	0.976615253
814	Bulletin of the Polish Academy of Science, Biological Sciences	10	123670	0.976694229
815	Det Kongelige Norske Videnskabers Selskabs Skrifter	10	123680	0.976773205
816	Det Norske Videnskaps-Akademi i Oslo	10	123690	0.976852181
817	Die Natur (Vienna)	10	123700	0.976931157
818	Entomofauna	10	123710	0.977010133
819	Insect, Utsunomiya	10	123720	0.977089108
820	Journal of Dali University	10	123730	0.977168084
821	Journal of the Faculty of Science, Hokkaido University, Series 6, Zoology	10	123740	0.97724706
822	Korean Journal of Applied Entomology	10	123750	0.977326036
823	Le Grotte d'Italia, Trieste	10	123760	0.977405012
824	Magasin de Zoologie	10	123770	0.977483988
825	Memoria de la Fundaci¢n La Salle de Ciencias Naturales	10	123780	0.977562963
826	Natural History Bulletin of the Siam Society	10	123790	0.977641939
827	Pnlope	10	123800	0.977720915
828	Sapiens. Revista Universitaria de Investigaci¢n	10	123810	0.977799891
829	Select. Sci. Treat. Lit. (Biol. Monogr.), Shaanxi Teachers Univ.	10	123820	0.977878867
830	Societas Entomologica, Organ fr den Internationalen Entomologen-Verein	10	123830	0.977957843
831	South of Russia: Ecology, Development	10	123840	0.978036819
832	Transactions of the Linnean Society of London, Zoology	10	123850	0.978115794
833	Transactions of the Suffolk Naturalists' Society	10	123860	0.97819477
834	Vie Milieu	10	123870	0.978273746
835	Zeitschrift fr Angewandte Zoologie	10	123880	0.978352722
836	Zeitschrift fr Morphologie und kologie der Tiere	10	123890	0.978431698
837	Actes de la Socit Scientifique du Chilie	9	123899	0.978502776
838	Akademii Naouk Soiouza Trudy Kazachstanskogo Filiala	9	123908	0.978573854
839	Anales de la Sociedad Espa¤ola de Historia Natural	9	123917	0.978644933
840	Arachnologia	9	123926	0.978716011
841	Arachnologorum Congressus Internationalis V, Proceedings of the Fifth International Congress on Arachnology, Brno, Folk C (ed)	9	123935	0.978787089
842	Arachnology	9	123944	0.978858167
843	Armadillo Papers	9	123953	0.978929246
844	Australian Entomologist	9	123962	0.979000324
845	Australian Journal of Entomology	9	123971	0.979071402
846	Avhandlinger utgitt av det Norske Videnskaps-Akademi i Oslo	9	123980	0.97914248
847	Biologia Gallo-Hellenica	9	123989	0.979213559
848	Boletin de la Academia de Ciencias Fisicas, Matematicas y Naturales, Caracas	9	123998	0.979284637
849	Buenos Aires, Zoolog¡a	9	124007	0.979355715
850	Bulletin of the Osaka Museum of Natural History	9	124016	0.979426793
851	Byulleten Moskovskogo Obshchestva Ispytatelei Prirody	9	124025	0.979497872
852	Chicago Academy of Sciences, Natural History Miscellanea	9	124034	0.97956895
853	Communications de la Facult des Sciences de l'Universit d'Ankara, Serie C	9	124043	0.979640028
854	Field and Laboratory (Dallas)	9	124052	0.979711106
855	Hakubutsu-gaku Zasshi	9	124061	0.979782185
856	Henan Science	9	124070	0.979853263
857	Hong-kong Naturalist	9	124079	0.979924341
858	Investigaciones Zoolo?gicas Chilenas	9	124088	0.979995419
859	Journal of Hubei University	9	124097	0.980066498
860	Journal of the Arizona Academy of Science	9	124106	0.980137576
861	Journal of the Entomological Society of Ontario	9	124115	0.980208654
862	Journal of the Liaoning University	9	124124	0.980279732
863	Journal of the Royal Society of New Zealand	9	124133	0.980350811
864	Mmoires de la Socit des Sciences Naturelles de Neuchtel	9	124142	0.980421889
865	Mmoires de la Socit Royal Belge d'Entomologie	9	124151	0.980492967
866	Neue Entomologische Nachrichten	9	124160	0.980564045
867	Obra del Centen rio del Museu de La Plata	9	124169	0.980635124
868	Proceedings of the Boston Society of Natural History	9	124178	0.980706202
869	Proceedings of the Zoological Society, Calcutta	9	124187	0.98077728
870	Sandhill Crane Press	9	124196	0.980848358
871	Stapfia	9	124205	0.980919437
872	The Philippine Agricultural Scientist	9	124214	0.980990515
873	Verhandlungen des Naturwissenschaftlichen Vereins in Hamburg, Neue Folge	9	124223	0.981061593
874	Zoologica Baetica	9	124232	0.981132672
875	Zoologica, Scientific Contributions of the New York Zoological Society	9	124241	0.98120375
876	<i>Gosho-zan</i>. Scientific Research Association of Yamagata Prefecture, Japan	8	124249	0.98126693
877	Annalen des Naturhistorischen Museums in Wien, Serie B	8	124257	0.981330111
878	Anzeiger der sterreichische Akademie der Wissenschaften, Mathematisch-Naturwissenschatliche Klasse	8	124265	0.981393292
879	Arachnological News	8	124273	0.981456472
880	Arthropoda Scientia	8	124281	0.981519653
881	Australian Museum	8	124289	0.981582834
882	Bulletin of the Raffles Museum Singapore	8	124297	0.981646014
883	Collins	8	124305	0.981709195
884	Dalnauka	8	124313	0.981772376
885	Forhandlinger i Videnskab-Selskabets i Christiania	8	124321	0.981835557
886	Garciana	8	124329	0.981898737
887	H. Veenman	8	124337	0.981961918
888	Hessische Faunistische Briefe	8	124345	0.982025099
889	Invertebrate Biology	8	124353	0.982088279
890	Izvestija Severo-Kavkazskogo Naucnogo Centra Vyssej Skoly	8	124361	0.98215146
891	Journal of the Baoding Teachers College	8	124369	0.982214641
892	Journal of the Xinjiang August 1<sup>st</sup> Agricultural College	8	124377	0.982277821
893	Journal of Xiangtan Teachers College	8	124385	0.982341002
894	Korean Journal of Biological Sciences	8	124393	0.982404183
895	Kungliga Fysiografiska Sllskapets i Lund Frhandlingar (Proceedings of the Royal Physiographic Society at Lund)	8	124401	0.982467363
896	Ky?do to Kagaku	8	124409	0.982530544
897	La Animala Mondo	8	124417	0.982593725
898	Memoirs of the Museum of Victoria	8	124425	0.982656905
899	Memorie della Societa Italiana di Scienze Naturali e del Museo Civico di Storia Naturale di Milano	8	124433	0.982720086
900	Mission Zoologique Belge aux ?les Galapagos et en Ecuador (N. et J. Leleup, 1964?1965), Rsultats Scientifiques	8	124441	0.982783267
901	Nauchnye Doklady Vysshe? Shkoly, Biologicheskie Nauki	8	124449	0.982846447
902	fversigt af Finska Vetenskaps Societetens Frhandlingar	8	124457	0.982909628
903	Publicaciones de la Misi¢n de Estudios de Patologia Regional Argentina, Jujuy	8	124465	0.982972809
904	Rassegna Faunistica	8	124473	0.983035989
905	Revista da Sociedade Brasileira de Sciencias	8	124481	0.98309917
906	Sborn¡k Trudov Zoologicheskogo Muzeya MGU, Moscow State University	8	124489	0.983162351
907	Studies for Nature Conservation and Restoration in Mino-o Dam Area, Osaka Prefecture	8	124497	0.983225531
908	Technical Bulletin, Virginia Agricultural Experiment Station, Blacksburg, Virginia	8	124505	0.983288712
909	Transactions of the Entomological Society of New South Wales	8	124513	0.983351893
910	Uchenye Zapiski, Permskij Gosudarstvennyj Universitet Imeni A. M. Gorkogo	8	124521	0.983415073
911	Vestnik Yuzhnogo Nauchnogo Tsentra Rossijskaja Akademija Nauk, Rostov	8	124529	0.983478254
912	Victoria Naturalist	8	124537	0.983541435
913	Zeitschrift fr Entomologie, Breslau	8	124545	0.983604615
914	Acta Literaria Scientia Universalis Hungarica	7	124552	0.983659898
915	Acta pro Fauna et Flora Universali, Seria I, Zoologia	7	124559	0.983715182
916	Anales de la Sociedad Cient¡fica Argentina	7	124566	0.983770465
917	Annales of the Durban Museum	7	124573	0.983825748
918	Archiv fr die Naturkunde Liv-, Ehst- und Kurlands	7	124580	0.983881031
919	Atti della Societa Italiana di Scienze Naturali e del Museo Civico di Storia Naturale di Milano	7	124587	0.983936314
920	Australian Geographic Society Reports	7	124594	0.983991597
921	Baika Literary Bulletin	7	124601	0.98404688
922	Biologia Bratislawa	7	124608	0.984102163
923	Bollettino del Museo Regionale di Scienze Naturali di Torino	7	124615	0.984157446
924	Bollettino dell'Accademia Gioenia di Scienze Naturali	7	124622	0.984212729
925	Bulletin de l'Acadmie Polonaise des Sciences	7	124629	0.984268012
926	Bulletin of the Sounkyo Museum of Natural History	7	124636	0.984323296
927	China Science and Technology Press	7	124643	0.984378579
928	Chinese Journal of Zoology, Peking	7	124650	0.984433862
929	Dnepropetrovsk	7	124657	0.984489145
930	Doriana	7	124664	0.984544428
931	e-Acta Naturalia Pannonica	7	124671	0.984599711
932	Entomologiste	7	124678	0.984654994
933	Glasnik Republickog Zavoda za Zastitu Prirode i Prirodnjackog Muzeja Titogradu	7	124685	0.984710277
934	Jenaische Denkschriften	7	124692	0.98476556
935	Journal of Liaoning Forestry Science and Technology	7	124699	0.984820843
936	Journal of the Kansas Entomological Society	7	124706	0.984876126
937	Journal of the Scientific Academy of Science Lisboa	7	124713	0.984931409
938	Korean Journal of Soil Zoology	7	124720	0.984986693
939	Korrespondenz-Blatt des Zoologisch-Mineralogischen Vereins in Regensburg	7	124727	0.985041976
940	Lavori della Societ Italiana di Biogeografia	7	124734	0.985097259
941	Le Naturaliste Canadien	7	124741	0.985152542
942	Mathematikai s Termszettudom nyi Kzlemnyek	7	124748	0.985207825
943	Medio Ambiente	7	124755	0.985263108
944	Nagasaki Biological Society	7	124762	0.985318391
945	Naturwissenschaftliche Wochenschrift	7	124769	0.985373674
946	Nauka Publisher	7	124776	0.985428957
947	Notes of the Arachnologists of the Southwest	7	124783	0.98548424
948	Philosophical Transactions of the Royal Society of London	7	124790	0.985539523
949	Physis	7	124797	0.985594807
950	Proceedings of Recent Advances in Life Sciences, Dibrugarh University	7	124804	0.98565009
951	Proceedings of the 16<sup>th</sup> European Colloquium of Arachnology	7	124811	0.985705373
952	Programm zur ffentlichen Prfung der Schler der hheren Burgschule Knigsberg	7	124818	0.985760656
953	Scientific Publishers	7	124825	0.985815939
954	Tangdu Journal	7	124832	0.985871222
955	Trudy Gosudarstvennogo Zapovednika "Rostovskii"	7	124839	0.985926505
956	Acta ent bohemoslavaca	6	124845	0.985973891
957	Acta Societatis Scientiarum Naturalium Moraviae	6	124851	0.986021276
958	African Zoology	6	124857	0.986068662
959	Akademia Nauk	6	124863	0.986116047
960	Anadolu University Journal of Science and Technology, C	6	124869	0.986163433
961	Annales Entomologici Fennici	6	124875	0.986210818
962	Annals of Entomology, Dehradun	6	124881	0.986258204
963	Annual Report of the Geological Survey of Indiana	6	124887	0.986305589
964	Archives of Biological Science Belgrade	6	124893	0.986352975
965	Atti del Reale Istituto Veneto di Scienze, Lettere ed Arti	6	124899	0.98640036
966	Aufstze und Reden der Senckenbergischen Naturforschenden Gesellschaft	6	124905	0.986447746
967	Bergens Museums Aarbok	6	124911	0.986495131
968	Bibliotheca Zoologica	6	124917	0.986542517
969	Biolo?ki vestnik Ljubljana	6	124923	0.986589902
970	Bollettino dell'Associazione Romana di Entomologia	6	124929	0.986637288
971	Bulletin de la Socit d'tudes des Sciences Naturelles du Vaucluse	6	124935	0.986684673
972	Bulletin of miscellaneous information, Royal Botanic Gardens, Kew	6	124941	0.986732059
973	Bulletin of the Brooklyn Institute of Arts and Sciences	6	124947	0.986779444
974	Eastern Cape Naturalist	6	124953	0.98682683
975	Entomologische Zeitschrift, Stettin	6	124959	0.986874215
976	European Journal of Entomology	6	124965	0.986921601
977	Hokuryukan Co.	6	124971	0.986968986
978	Institute for Biological Problems of the North	6	124977	0.987016372
979	Jornadas sobre el Medio Natural Albacetense	6	124983	0.987063757
980	Journal of Entomology and Zoology Studies	6	124989	0.987111143
981	Journal of Hunan Normal University	6	124995	0.987158528
982	Journal of Inner Mongolia Teacher's University, Natural Science Edition	6	125001	0.987205914
983	Journal of the Agricultural University Hebei	6	125007	0.987253299
984	Journal of the Huizhou Teachers School	6	125013	0.987300685
985	Journal of the Royal Society of Western Australia	6	125019	0.98734807
986	Journal of the University of Poona	6	125025	0.987395456
987	Korean Journal of Entomology	6	125031	0.987442841
988	Memorias da Academia Real das Sciencias de Lisboa	6	125037	0.987490227
989	Miscellanea Zoologica Sumatrana	6	125043	0.987537612
990	Moscow, Akademia Nauk	6	125049	0.987584998
991	Naturwissenschaftliche Abhandlungen, Wien	6	125055	0.987632383
992	Nova Acta Leopoldina, Abhandlungen der Kaiserlich Leopoldinisch-Carolinisch Deutschen Akademie der Naturforscher	6	125061	0.987679769
993	Occasional Papers of the Boston Society of Natural History	6	125067	0.987727154
994	Pensoft Publishers	6	125073	0.98777454
995	Plant Protection Institute & Berzsenyi College	6	125079	0.987821925
996	Postilla	6	125085	0.987869311
997	Publications of the Oklahoma Biological Survey	6	125091	0.987916696
998	Scientific Treatise on Systematic and Evolutionary Zoology	6	125097	0.987964082
999	Silliman's Journal of Science and Arts	6	125103	0.988011467
1000	Spider Club News	6	125109	0.988058853
1001	Thai Journal of Agricultural Science	6	125115	0.988106238
1002	The Victorian Naturalist	6	125121	0.988153624
1003	The Zoological Journal	6	125127	0.988201009
1004	Transactions of the Royal Canadian Institute, Toronto	6	125133	0.988248395
1005	Turrialba	6	125139	0.98829578
1006	University of Iowa Studies in Natural History	6	125145	0.988343166
1007	University of Washington Press	6	125151	0.988390551
1008	Vestnik Yuzhnogo Nauchnogo Tsentra RAN, Rostov	6	125157	0.988437937
1009	Zoological Science	6	125163	0.988485322
1010	Zoologisches Zentralblatt	6	125169	0.988532708
1011	Akitu	5	125174	0.988572196
1012	Anales del Instituto Biol¢gico de la Universidad Nacional Aut¢noma de Mxico	5	125179	0.988611684
1013	Anales del Instituto Biol¢gico de la Universidad Nacional Aut¢noma de Mxico, Serie Zoologia	5	125184	0.988651172
1014	Anartia	5	125189	0.98869066
1015	Ann. Rep. JIBP/CT-S	5	125194	0.988730147
1016	Annales de la Socit Royal de Zoologie de Belgique	5	125199	0.988769635
1017	Annals of the Queensland Museum	5	125204	0.988809123
1018	Atti XIII Congresso Nazionale Italiano di Entomologia, Sestriere-Torino	5	125209	0.988848611
1019	Australian Zoologist	5	125214	0.988888099
1020	Biological Diversity and Conservation	5	125219	0.988927587
1021	Boletin Biologico Rio de Janeiro	5	125224	0.988967075
1022	Bollettino di Zoologia	5	125229	0.989006563
1023	Bulletin de la Socit Entomologique d'Egypte	5	125234	0.989046051
1024	Bulletin de la Socit Vaudoise des Sciences Naturelles	5	125239	0.989085539
1025	Cincia e Cultura	5	125244	0.989125027
1026	Comptes Rendus Hebdomadaires des Sances de l'Acadmie des Sciences Paris	5	125249	0.989164515
1027	Doklady Akademii Nauk Tadzhikistan SSR	5	125254	0.989204002
1028	Ecological Studies of Nature Conservation of the Ryukyu Islands	5	125259	0.98924349
1029	Entomologische Zeitschrift, Stuttgart	5	125264	0.989282978
1030	Exothermae Magazine	5	125269	0.989322466
1031	Fabreries	5	125274	0.989361954
1032	Fauna och Flora	5	125279	0.989401442
1033	Fieldiana Zoology, New Series	5	125284	0.98944093
1034	Folia Entomologica Mexicana	5	125289	0.989480418
1035	Geobios new Reports	5	125294	0.989519906
1036	Graellsia	5	125299	0.989559394
1037	Hacettepe Journal of Biology and Chemistry	5	125304	0.989598882
1038	Journal of Asia-Pacific Entomology	5	125309	0.98963837
1039	Journal of Hebei University, Natural Sciences	5	125314	0.989677858
1040	Journal of Ningbo University, Natural Science Edition	5	125319	0.989717345
1041	Kieler Meeresforschungen	5	125324	0.989756833
1042	Korean Journal of Biology	5	125329	0.989796321
1043	Latvijas Entomologs	5	125334	0.989835809
1044	Ledoux	5	125339	0.989875297
1045	Levende Natuur	5	125344	0.989914785
1046	Livredu Centenaire mile G. Racovitza 1868- 1968	5	125349	0.989954273
1047	Mmoires de l'Institut Scientifique de Madagascar	5	125354	0.989993761
1048	Memorie dell'Associazione Naturalistica Piemontese	5	125359	0.990033249
1049	Miscellanea Speologica Romanica	5	125364	0.990072737
1050	Nieuwsbrief Spined	5	125369	0.990112225
1051	Otemon Gakuin University	5	125374	0.990151713
1052	Perio?dico Zoolo?gico	5	125379	0.990191201
1053	Revista del Museo Argentino de Ciencias Naturales, Nueva Serie	5	125384	0.990230688
1054	Revista Sciencias	5	125389	0.990270176
1055	Revistas de la Universidad Nacional de C¢rdoba	5	125394	0.990309664
1056	S&atilde;o Paulo, Edart	5	125399	0.990349152
1057	Scientia	5	125404	0.99038864
1058	Scientific Memoirs of the M. Gorky State University of Perm	5	125409	0.990428128
1059	Scientific Papers of the Namib Desert Research Station	5	125414	0.990467616
1060	Segunda Jornada Entomoepidemiol¢gica Argentina	5	125419	0.990507104
1061	Systematic Biology	5	125424	0.990546592
1062	The Lancashire Naturalist	5	125429	0.99058608
1063	The Norwegian-British-Swedish Antarctic Expedition 1949-52, Scientific Results	5	125434	0.990625568
1064	The Western Australian Naturalist	5	125439	0.990665056
1065	Transactions of the Norfolk and Norwich Naturalists' Society	5	125444	0.990704543
1066	Treubia	5	125449	0.990744031
1067	Zapateri, Revista Aragonesa de Entomolog¡a	5	125454	0.990783519
1068	Zoologie (Leipzig)	5	125459	0.990823007
1069	Acta Palaeontologica Polonica	4	125463	0.990854598
1070	Acta Zoologica Lituanica	4	125467	0.990886188
1071	Acta Zo¢logica Mexicana (n. s.)	4	125471	0.990917778
1072	Acta, Pontificia Academia Scientiarum	4	125475	0.990949369
1073	?llatani Kzlemnyek	4	125479	0.990980959
1074	Anales del Instituto Fisico-Geografico y del Museo Nacional de Costa-Rica	4	125483	0.991012549
1075	Annals of Natural History	4	125487	0.99104414
1076	Annals of Scottish Natural History	4	125491	0.99107573
1077	Annals of the Ditsong National Museum of Natural History	4	125495	0.99110732
1078	Annual Report and Proceedings of the Chester Society of Natural Science, Literature and Art	4	125499	0.991138911
1079	Anzeiger fr Schdlingskunde, Pflanzenschutz, Umweltschutz	4	125503	0.991170501
1080	Arthropod Structure & Development	4	125507	0.991202091
1081	Aula y Ambiente	4	125511	0.991233682
1082	Banisteria	4	125515	0.991265272
1083	Beaufortia	4	125519	0.991296862
1084	Beitrge zur Naturkundlichen Forschung in Sdwestdeutschland	4	125523	0.991328453
1085	Bijdragen tot de Dierkunde	4	125527	0.991360043
1086	Biodiversity Journal	4	125531	0.991391633
1087	Biologia Gabonica	4	125535	0.991423224
1088	Biological Bulletin of India	4	125539	0.991454814
1089	BMC Ecology	4	125543	0.991486404
1090	Boletim de Ind£stria Animal Sao Paulo	4	125547	0.991517995
1091	Bollettino della Socit Veneziana di Storia Naturale e del Museo Civico di Storia Naturale, Venezia	4	125551	0.991549585
1092	British Antarctic ("Terra Nova") Expedition, 1910, Natural History Reports, Zoology	4	125555	0.991581175
1093	Bulletin - Zoological Society of Egypt	4	125559	0.991612766
1094	Bulletin du Musum de Gorgie	4	125563	0.991644356
1095	Bulletin of the Gunma Biological Education Society	4	125567	0.991675946
1096	Bulletin of the Liverpool Museum	4	125571	0.991707537
1097	Bulletin of the Yamagata Prefectural Museum	4	125575	0.991739127
1098	Canterbury Museum Bulletin	4	125579	0.991770717
1099	Casopis N rodn¡ho Muzea Praze	4	125583	0.991802308
1100	Chiron Publications	4	125587	0.991833898
1101	Collecting & Breeding, Tokyo	4	125591	0.991865488
1102	Entomologia Generalis	4	125595	0.991897079
1103	Entomologische Mitteilungen	4	125599	0.991928669
1104	Entomologische Nachrichten und Berichte	4	125603	0.991960259
1105	Extra, Museo Argentino de Ciencias Naturales, Nueva Serie	4	125607	0.99199185
1106	Fauna och Flora, Uppsala	4	125611	0.99202344
1107	Gortania, Atti del Museo Friulano di Storia Naturale	4	125615	0.99205503
1108	Haryana Agricultural University Journal of Research	4	125619	0.992086621
1109	Historia Naturalis Bulgarica	4	125623	0.992118211
1110	Integrative Bioscience	4	125627	0.992149801
1111	International Journal of Agricultural Biology	4	125631	0.992181392
1112	Internationale Entomologische Zeitschrift, Guben	4	125635	0.992212982
1113	Izvestija na Zoologiceskija Institut Sofija	4	125639	0.992244572
1114	Izvestiya Otdelenie Biologicheskikh Nauk Akademii Tadzhikskoi SSR	4	125643	0.992276163
1115	Izwestia na Beulgarskoto Entomologitschesko Droujestwo Sofia	4	125647	0.992307753
1116	Journal of Hebei University	4	125651	0.992339343
1117	Journal of Inner Mongolia Normal University, Natural Science Edition	4	125655	0.992370934
1118	Journal of Insect behaviour	4	125659	0.992402524
1119	Journal of Shanxi University, Natural Sciences	4	125663	0.992434114
1120	Journal of the Entomological Society of Australia, New South Wales	4	125667	0.992465705
1121	Journal of the Graduate School of Education, Kyungpook National University	4	125671	0.992497295
1122	Journal of the Liaoning Normal University, Natural Science Edition	4	125675	0.992528885
1123	Journal of Tokyo University for General Education, Natural Sciences	4	125679	0.992560476
1124	Journal of Zaozhuang Teachers College	4	125683	0.992592066
1125	Kansaishizenkagaku	4	125687	0.992623656
1126	Meddelanden frn Gteborgs Musei Zoologiska Avdelning	4	125691	0.992655247
1127	Memorias de la Sociedad de Ciencias Naturales La Salle	4	125695	0.992686837
1128	Mitteilungen des Naturwissenschaftlichen Vereines fr Steiermark	4	125699	0.992718427
1129	Natuurhistorisch Maandblad	4	125703	0.992750018
1130	Neueste Schriften der Naturforschenden Gesellschaft in Danzig	4	125707	0.992781608
1131	Novitates Caribaea	4	125711	0.992813198
1132	Panstowe Wydawnictwo Naukowe	4	125715	0.992844789
1133	Phegea	4	125719	0.992876379
1134	Proceedings of the Arkansas Academy of Science	4	125723	0.992907969
1135	Revue Zoologique par la Socit Cuvirienne	4	125727	0.99293956
1136	Rivista Piemontese di Storia Naturale	4	125731	0.99297115
1137	Sborn¡k P?¡rodov?deck Spole?nosti v Moravsk Ostrav?	4	125735	0.99300274
1138	Special Bulletin of the Japanese Society of Coleopterology	4	125739	0.993034331
1139	Territory & Natural Resources Study	4	125743	0.993065921
1140	The Southwestern Naturalist	4	125747	0.993097511
1141	Transactions of the Kansas Academy of Science	4	125751	0.993129102
1142	Uchenye Zapiski, Permskii Gosudarstvennyi Universitet M. Gorkogo	4	125755	0.993160692
1143	Van Nostrand Reinhold	4	125759	0.993192282
1144	Vasculum	4	125763	0.993223873
1145	Veda Pr¡rodn¡	4	125767	0.993255463
1146	Verffentlichungen des Tiroler Landesmuseums Ferdinandeum	4	125771	0.993287053
1147	Vidya	4	125775	0.993318644
1148	Yamanashi No Konchu	4	125779	0.993350234
1149	Zoological Magazine,Tokyo	4	125783	0.993381824
1150	Abhandlungen und Berichte des Naturkundlichen Museums "Mauritianum", Altenburg	3	125786	0.993405517
1151	Acta Laser Biology Sinica	3	125789	0.99342921
1152	Akademiai Kiad¢	3	125792	0.993452903
1153	Analele Universitatii Bucuresti Seria Stiintele naturii, Biologie	3	125795	0.993476596
1154	Annales Universitatis Scientiarum Budapestinensis	3	125798	0.993500288
1155	Annual Report of the Japanese Committee of the International Biological Program/CT-S for the Fiscal Year of 1968	3	125801	0.993523981
1156	Aracnologia	3	125804	0.993547674
1157	Arquivos do Museu Bocage	3	125807	0.993571367
1158	Atti della Reale Accademia delle Scienze Fisiche e Matematiche di Napoli	3	125810	0.993595059
1159	Atti della Societa dei Naturalisti di Modena	3	125813	0.993618752
1160	Bertrand	3	125816	0.993642445
1161	Biologica Nyssana	3	125819	0.993666138
1162	Biological Bulletin of the National Taiwan Normal University	3	125822	0.99368983
1163	Biological Journal of the Linnean Society	3	125825	0.993713523
1164	Bionature	3	125828	0.993737216
1165	Boletim de Zoologia	3	125831	0.993760909
1166	Boletin de la Real Sociedad Espanola de Historia Natural	3	125834	0.993784601
1167	Bolet¡n de la Sociedad de Historia Natural de Baleares	3	125837	0.993808294
1168	Bulletin de la Socit Europenne d'Arachnologie	3	125840	0.993831987
1169	Bulletin of Hangzhou Normal College	3	125843	0.99385568
1170	Bulletin, Shadong University	3	125846	0.993879372
1171	Calodema Supplementary Paper	3	125849	0.993903065
1172	?asopis Moravskho Zemskho Musea, Brno	3	125852	0.993926758
1173	Cincia e Cultura, Sao Paulo	3	125855	0.993950451
1174	Ciencias	3	125858	0.993974143
1175	Deutsche Entomologische Zeitschrift, Neue Folge	3	125861	0.993997836
1176	Doriana, Supplemento agli Annali del Museo C¡vico di Storia Naturale "G. Doria"	3	125864	0.994021529
1177	Entomologica Romanica	3	125867	0.994045222
1178	Entomologische Mitteilungen aus dem Zoologischen Staatsinstitut und Zoologischen Museum Hamburg	3	125870	0.994068914
1179	Essays and Studies Published in Commemoration of the 10th Anniversary of Otemon Gakuin University	3	125873	0.994092607
1180	Estudos de Biologia, Curitiba	3	125876	0.9941163
1181	Fauna & Flora	3	125879	0.994139993
1182	Folia Clinica et Biologica, Piracicaba, Sao Paulo	3	125882	0.994163685
1183	Folia Faunistica Slovaca	3	125885	0.994187378
1184	Great Lakes Entomologist	3	125888	0.994211071
1185	Guizhou Science and Technology Publishing House	3	125891	0.994234764
1186	Historia natural, Corrientes	3	125894	0.994258456
1187	Insektuto, Konch?aik?kai	3	125897	0.994282149
1188	Journal of Anatolian Natural Sciences	3	125900	0.994305842
1189	Journal of Anhui Normal University	3	125903	0.994329535
1190	Journal of Applied Biological Sciences	3	125906	0.994353227
1191	Journal of Hebei Normal University, Natural Sciences	3	125909	0.99437692
1192	Journal of the Fujian Agricultural College	3	125912	0.994400613
1193	Journal of the Zoological Society of India	3	125915	0.994424306
1194	Journal of Yunan University	3	125918	0.994447998
1195	Junior Philippine Scientist	3	125921	0.994471691
1196	Kyungpook Educational Forum Kyungpook National University	3	125924	0.994495384
1197	Lansania	3	125927	0.994519077
1198	Mrkische Tierwelt	3	125930	0.994542769
1199	Memoirs of the National Museum, Melbourne	3	125933	0.994566462
1200	Mitteilungen aus dem Hamburgischen Zoologischen Museum und Institut	3	125936	0.994590155
1201	Mitteilungen der Entomologischen Gesellschaft Basel	3	125939	0.994613848
1202	North-Western Journal of Zoology	3	125942	0.99463754
1203	Nouvelles Annales du Musum d'Histoire Naturelle de Paris	3	125945	0.994661233
1204	Occasional Papers of the Royal Ontario Museum of Zoology	3	125948	0.994684926
1205	Open Journal of Animal Sciences	3	125951	0.994708619
1206	Otemon Bulletin for the Australian Studies	3	125954	0.994732311
1207	Pensoft	3	125957	0.994756004
1208	Polish Journal of Entomology	3	125960	0.994779697
1209	Proceedings of the Koninklijke Nederlandse Akademie van Wetenschappen	3	125963	0.99480339
1210	Publica?es Avulsas do Museu Nacional, Rio de Janeiro	3	125966	0.994827082
1211	Report of Fur-Seal Investigations	3	125969	0.994850775
1212	Reports of the Korean Association for Conservation of Nature	3	125972	0.994874468
1213	Res£menes II Congreso Argentino de Entomolog¡a, C¢rdoba	3	125975	0.994898161
1214	Revista Chilena de Entomolog¡a	3	125978	0.994921853
1215	Revista Espa¤ola de Entomologia	3	125981	0.994945546
1216	Revue Valdtaine d'Histoire Naturelle	3	125984	0.994969239
1217	Rhizocrinus	3	125987	0.994992932
1218	Sarawak Museum Journal	3	125990	0.995016624
1219	Sborn¡k Vysok ?koly Zem?d?lsk, Brno	3	125993	0.995040317
1220	Science Bulletin of the Faculty of Liberal Arts and Education, Nagasaki University	3	125996	0.99506401
1221	Studii ?i Cercet?ride Biologie, Seria Biologie Animal?	3	125999	0.995087703
1222	The Philippine Journal of Science	3	126002	0.995111395
1223	Theses collection commemorating the 60<sup>th</sup> Birthday of Dr. In Sock Yang	3	126005	0.995135088
1224	Transactions of the New York State Agricultural Society	3	126008	0.995158781
1225	Transactions of the San Diego Society of Natural History	3	126011	0.995182474
1226	Travaux de l'Institut Franais d'tudes Andines	3	126014	0.995206166
1227	Trends in Life Sciences	3	126017	0.995229859
1228	University of Michigan Press	3	126020	0.995253552
1229	Vestnik Leningradskogo Universiteta	3	126023	0.995277245
1230	World Journal of Zoology	3	126026	0.995300937
1231	Wykaz Szkoly Glownej Warszawskiego	3	126029	0.99532463
1232	Zoological Museum, Moscow State University	3	126032	0.995348323
1233	Zoologische Abhandlungen, Staatliches Museum fr Tierkunde Dresden	3	126035	0.995372016
1234	Zoologische Jahrbcher, Abteilung fr Anatomie und Ontogenie der Tiere	3	126038	0.995395708
1235	Zoosystematics and Evolution	3	126041	0.995419401
1236	5<sup>me</sup> Colloque d'Arachnologie d'Expression Franaise, Barcelona	2	126043	0.995435196
1237	A NYME Savaria Egyetemi Kzpont Tudom nyos Kzlemnyei, Szombathely XVII. Termszettudom nyok	2	126045	0.995450992
1238	Academic Press	2	126047	0.995466787
1239	Acta Agriculturae Universitatis Jiangxiensis	2	126049	0.995482582
1240	Acta Arachnologica	2	126051	0.995498377
1241	Acta Phytopathologica et Entomologica Hungarica	2	126053	0.995514172
1242	Acta Zoologica Taiwanica	2	126055	0.995529967
1243	Actas de las Jornadas de la Asociaci¢n Espa¤ola de Entomolog¡a, Sevilla	2	126057	0.995545763
1244	Anales de Biologia, Universidad de Murcia	2	126059	0.995561558
1245	Anales del Museo de Historia Natural de Valparai?so	2	126061	0.995577353
1246	Annaes des Sciencias Naturaes, Porto	2	126063	0.995593148
1247	Annales Zoologici Musei Polonici Historiae Naturalis	2	126065	0.995608943
1248	Annuario Zoologico	2	126067	0.995624738
1249	Aquilo	2	126069	0.995640534
1250	Arachne	2	126071	0.995656329
1251	Archiv fr Hydrobiologie	2	126073	0.995672124
1252	Atti dell'Accademia Scientifica Veneto-Trentino-Istriana	2	126075	0.995687919
1253	Badania Fizjograficzne nad Polsk? Zachodni?	2	126077	0.995703714
1254	Barlangkutat s (Budapest)	2	126079	0.995719509
1255	Biologia (Bratislava)	2	126081	0.995735305
1256	Biologia (Pakistan)	2	126083	0.9957511
1257	Biological Magazine Okinawa	2	126085	0.995766895
1258	Biologie in unserer Zeit	2	126087	0.99578269
1259	Biosystematica	2	126089	0.995798485
1260	Bishop Museum Occasional Papers	2	126091	0.99581428
1261	Bohemia Centralis	2	126093	0.995830076
1262	Bolet¡n de Biodiversidad de Chile	2	126095	0.995845871
1263	Boletin de la Academia Nacional de Ciencias en C¢rdoba	2	126097	0.995861666
1264	Boletin del Centro de Investigaciones Biologicas de la Universidad del Zulia	2	126099	0.995877461
1265	Bollettino della Societ dei Naturalisti in Napoli	2	126101	0.995893256
1266	Bollettino della Societ Zoologica Italiana	2	126103	0.995909051
1267	Bollettino Scientifico, Pavia	2	126105	0.995924847
1268	Bulletin de Association Nationale des Professeurs de Biologie de Belgique	2	126107	0.995940642
1269	Bulletin de l?Institut des Recherches Biologiques, Molotov	2	126109	0.995956437
1270	Bulletin, Office National Anti-Acridien, Alger	2	126111	0.995972232
1271	Caldasia	2	126113	0.995988027
1272	Chiba-seibutsu-shi	2	126115	0.996003822
1273	China Environmental Science Press	2	126117	0.996019618
1274	Chudleigh Publishing	2	126119	0.996035413
1275	Cistula Entomologica	2	126121	0.996051208
1276	Cocuyo	2	126123	0.996067003
1277	Comptes Rendus de l'Acadmie des Sciences Paris	2	126125	0.996082798
1278	Comptes Rendus du XII Congrs International de Zoologie, Lisbonne 1935	2	126127	0.996098593
1279	Conferncia Internacional dos Africanistas Ocidentais, Sess?o	2	126129	0.996114389
1280	Contributions to Science of the Santa Barbara Museum of Natural History	2	126131	0.996130184
1281	Cuadernos de l'Espeleologia	2	126133	0.996145979
1282	Deinsea	2	126135	0.996161774
1283	Det Trondheimske Selskabs Skrifter	2	126137	0.996177569
1284	Encyclopdie Mthodique, Histoire Naturelle, Entomologie	2	126139	0.996193364
1285	Entomologische Rundschau, Stuttgart	2	126141	0.99620916
1286	Entomologist	2	126143	0.996224955
1287	Entomology Circulars, Florida Department of Agriculture	2	126145	0.99624075
1288	Exothermae	2	126147	0.996256545
1289	Exotiske Insekter	2	126149	0.99627234
1290	Faculty of Humanics Revue, Otemon Gakuin University	2	126151	0.996288135
1291	Fauna Norvegica	2	126153	0.996303931
1292	Feuille des Jeunes Naturalistes	2	126155	0.996319726
1293	Folia Musei Historico-Naturalis Bakonyiensis	2	126157	0.996335521
1294	Genus Supplement	2	126159	0.996351316
1295	Geologica Acta	2	126161	0.996367111
1296	Guizhou Science	2	126163	0.996382906
1297	Hakubutsu-no-tomo	2	126165	0.996398702
1298	Helictite	2	126167	0.996414497
1299	Industrialist	2	126169	0.996430292
1300	Insecta Koreana	2	126171	0.996446087
1301	Insekt-Nytt	2	126173	0.996461882
1302	International Scholarly Research Network Zoology	2	126175	0.996477677
1303	Irish Naturalist	2	126177	0.996493473
1304	Izvestiya Akademii Nauk Kazakhskoi SSR Seriya Biologicheskikh Nauk	2	126179	0.996509268
1305	Izvestiya Estestvenno-Nauchnogo Instituta pri Molotovskom Gosudarstvennom Universitete Imeni A. M. Gorkogo	2	126181	0.996525063
1306	Izwestia Imperatorskago Obtchiestwa Lioubitelei Iestwoznania, Antropology i Etnografy, Sostoiaschago pri Imperatorskom Moskowskom Ouniwersitete	2	126183	0.996540858
1307	Jahrbuch des Naturhistorischen Museums Bern	2	126185	0.996556653
1308	Journal of Cave and Karst Studies	2	126187	0.996572448
1309	Journal of Changde Teachers University, Natural Science Edition	2	126189	0.996588244
1310	Journal of Ecobiology	2	126191	0.996604039
1311	Journal of Guangxi Agricultural and Biological Science	2	126193	0.996619834
1312	Journal of Hangzhou University, Natural Science Edition	2	126195	0.996635629
1313	Journal of Hebei Agricultural Sciences	2	126197	0.996651424
1314	Journal of Inner Mongolia Normal University	2	126199	0.996667219
1315	Journal of Northeast Normal University	2	126201	0.996683015
1316	Journal of Shadong University, Natural Sciences	2	126203	0.99669881
1317	Journal of the Bengal Natural History Society	2	126205	0.996714605
1318	Journal of the Malaysian Branch of the Royal Asiatic Society	2	126207	0.9967304
1319	Journal of the Shanxi Agricultural University	2	126209	0.996746195
1320	Journal of the Society for Asian Natural History	2	126211	0.996761991
1321	Journal of Tokyo University for General Education	2	126213	0.996777786
1322	Journal of Yunan Agricultural University	2	126215	0.996793581
1323	Journal of Yunan Normal University	2	126217	0.996809376
1324	Kaupia - Darmstdter Beitrge zur Naturgeschichte	2	126219	0.996825171
1325	Kluwer Academic Publisher	2	126221	0.996840966
1326	Korean Journal of Environmental Biology	2	126223	0.996856762
1327	Kullabergs Natur	2	126225	0.996872557
1328	Laser Biology	2	126227	0.996888352
1329	Lucr?rile Institutului de speologie ?Emil Racovit??	2	126229	0.996904147
1330	Lundiana	2	126231	0.996919942
1331	Lunds Universitets rsskrift	2	126233	0.996935737
1332	Malayan Nature Journal	2	126235	0.996951533
1333	Mauritiana (Altenburg)	2	126237	0.996967328
1334	Mmoires de la Socit d'Histoire Naturelle de Paris	2	126239	0.996983123
1335	Miscellaneous Reports of the Hiwa Museum for Natural History, Hiroshima	2	126241	0.996998918
1336	Mitteilungen aus dem Geologisch-Palontologischen Institut der Universitt Hamburg	2	126243	0.997014713
1337	Mitteilungen des Badischen Landesvereins fr Naturkunde und Naturschutz	2	126245	0.997030508
1338	Natl. Pest Control Assoc. techn. Release	2	126247	0.997046304
1339	Natur og Museum	2	126249	0.997062099
1340	Natur und Museum	2	126251	0.997077894
1341	Natura Neotropicalis	2	126253	0.997093689
1342	Naturalista Siciliano	2	126255	0.997109484
1343	Neotr¢pica	2	126257	0.997125279
1344	Neues Jahrbuch fr Mineralogie, Geologie und Palontologie, Abhandlungen	2	126259	0.997141075
1345	Noticiario mensual del Museo Nacional de Historia Natural, Santiago	2	126261	0.99715687
1346	Nouveaux Mmoires de la Socit Impriale de Naturalistes de Moscou	2	126263	0.997172665
1347	Opera Corcontica	2	126265	0.99718846
1348	Opolskie Towarzystwo Przyjaciol Nauk Zeszyty Przyrodnicze	2	126267	0.997204255
1349	Orsis	2	126269	0.99722005
1350	Palaeontology	2	126271	0.997235846
1351	Proceedings of the Berwickshire Naturalists' Club	2	126273	0.997251641
1352	Proceedings of the First All-India Congress of Zoology 1959	2	126275	0.997267436
1353	Proceedings of the Imperial Academy, Tokyo	2	126277	0.997283231
1354	Proceedings of the Royal Society B, Biological Sciences	2	126279	0.997299026
1355	Proceedings of the Russian Entomological Society in St. Petersburg	2	126281	0.997314821
1356	Rec. West. Aust. Mus., Suppl.	2	126283	0.997330617
1357	Rep. sci. Res. Mt. Kirishima	2	126285	0.997346412
1358	Reports from the Department of Biology, University of Turku	2	126287	0.997362207
1359	Reports from the Department of Zoology, University of Turku	2	126289	0.997378002
1360	Revista Nordestina de Biologia	2	126291	0.997393797
1361	Revista Paraguaya de Microbiolog¡a	2	126293	0.997409592
1362	Revue Biologique du Nord de la France	2	126295	0.997425388
1363	Revue de l'Acadmie Bulgare des Sciences	2	126297	0.997441183
1364	Rivista di Biologia	2	126299	0.997456978
1365	Russian Entomological Journal	2	126301	0.997472773
1366	Sborn¡k Jiho?eskho Muzea v ?esk?ch Bud?jovic¡ch P?¡rodn¡ V?dy	2	126303	0.997488568
1367	Senckenbergiana	2	126305	0.997504363
1368	Serie Investigaci¢n, Instituto de Animales Venenosos "Dr. Jorge W. Abalos"	2	126307	0.997520159
1369	Sitzungsberichte der Kniglichen Bhmischen Gesellschaft der Wissenschaften, Mathematisch-naturwissenschaftliche Klasse	2	126309	0.997535954
1370	South African Medical Journal	2	126311	0.997551749
1371	Speleologicheskii Biulleten Estestvenno-Nauchnogo Instituta pri Molotovskom Gosudarstvennom Universitete im M. Gorkogo	2	126313	0.997567544
1372	Sprawozdania Komisyi Fisy¢graficznej Akademii Umiejetnosci w Krakowie	2	126315	0.997583339
1373	Taprobanica	2	126317	0.997599134
1374	Tecnociencia	2	126319	0.99761493
1375	The Lancashire and Cheshire Naturalist	2	126321	0.997630725
1376	Theses collection commemorating the 60<sup>th</sup> Birthday of Prof. Yung Ho Choi	2	126323	0.99764652
1377	Transactions of the Natural History Society of Formosa	2	126325	0.997662315
1378	Treballs de la Instituci¢ Catalana d'Historia Natural	2	126327	0.99767811
1379	Verhandlungen der Zoologisch-Botanischen Gesellschaft in Wien	2	126329	0.997693905
1380	Vestnik	2	126331	0.997709701
1381	Vestnik Juznogo Nautchogo Tsjentra	2	126333	0.997725496
1382	Vieraea	2	126335	0.997741291
1383	Vlastiv?dn? Sborn¡k Vyso?iny, Odd¡l V?d P?¡rodn¡ch	2	126337	0.997757086
1384	Washington, 32nd Congress, 2nd Session, Senate	2	126339	0.997772881
1385	Western Australian Naturalists Club	2	126341	0.997788676
1386	Zapiski Kiewskago Obtchiestwa Iestiestwoispytatelei	2	126343	0.997804472
1387	Zborn¡k Pr c Tatranskom Narodnom Parku	2	126345	0.997820267
1388	Zeitschrift fr Semiotik	2	126347	0.997836062
1389	Zeszyty Naukowe Uniwersytetu Szczeci?skiego, Acta Biologica	2	126349	0.997851857
1390	A Nyme Savaria Egyetemi Kzpont Tudom nyos Kzlemnyei XIX. Termszettudom nyok	1	126350	0.997859755
1391	A Nyme Savaria Egyetemi Kzpont Tudom nyos Kzlemnyei XVI. Termszettudom nyok	1	126351	0.997867652
1392	A. Ziemsen	1	126352	0.99787555
1393	Abhandlungen und Berichte des Museums der Natur Gotha	1	126353	0.997883447
1394	Academia Praha	1	126354	0.997891345
1395	Academic Journal of Konkuk University	1	126355	0.997899243
1396	Academie des Sciences l?URSS, Filiale Georgienne, Section de Zoologie	1	126356	0.99790714
1397	Acta Biologica Universitatis Daugavpiliensis	1	126357	0.997915038
1398	Acta Botanica Yunnanica, Supplement	1	126358	0.997922935
1399	Acta Entomologica Chilena	1	126359	0.997930833
1400	Actas de las Jornadas de Zoolog¡a del Uruguay	1	126360	0.997938731
1401	Akad. Nauk Kirghiz. SSR	1	126361	0.997946628
1402	?llattani Kzlemnyek	1	126362	0.997954526
1403	American Museum Journal	1	126363	0.997962423
1404	American Zoologist	1	126364	0.997970321
1405	Anadolu Doga Bilimleri Dergisi	1	126365	0.997978218
1406	Analele ?tiin?ifice Ale Universit??ii "Al. I. Cuza" Din Ia?i, Biologie animal?	1	126366	0.997986116
1407	Anales del Instituto de Medicina Regional Univercidad Nacional de Tucuman	1	126367	0.997994014
1408	Animal Science and Veterinary Medicine	1	126368	0.998001911
1409	Annales Scientifiques de l'Universit de Jassy	1	126369	0.998009809
1410	Annales Universitatis Mariae Curie-Sk?odowska, Lublin-Polonia	1	126370	0.998017706
1411	Annales Universitatis Scientiarum Budapestinensis de Rolando Etvs	1	126371	0.998025604
1412	Annual Report of the Otemon Gakuin University	1	126372	0.998033502
1413	Arachnida (Schweiz)	1	126373	0.998041399
1414	Ashkhabad	1	126374	0.998049297
1415	Atas do Simposio sobre a Biota Amazonica	1	126375	0.998057194
1416	Behavioral Ecology	1	126376	0.998065092
1417	Behavioral Ecology and Sociobiology	1	126377	0.998072989
1418	Beitrge zur Entomofaunistik	1	126378	0.998080887
1419	Berichte der Naturforschenden Gesellschaft zu Freiburg im Breisgau	1	126379	0.998088785
1420	Berichte der Senckenbergischen Naturforschenden Gesellschaft	1	126380	0.998096682
1421	Berichte und Ttigkeiten der Entomologischen Sektion Breslau	1	126381	0.99810458
1422	Berolini, Mollusca C.	1	126382	0.998112477
1423	Biodiversity Data Journal	1	126383	0.998120375
1424	Biogeographica	1	126384	0.998128273
1425	Biogeography	1	126385	0.99813617
1426	Biological Diversity & Conservation	1	126386	0.998144068
1427	Biosphaera, Tokyo	1	126387	0.998151965
1428	Biosystematics and Ecology Series	1	126388	0.998159863
1429	Biotropica	1	126389	0.99816776
1430	Boletim da Sociedade Entomol¢gica do Brasil	1	126390	0.998175658
1431	Boletim da Sociedade Portuguesa de Entomologia	1	126391	0.998183556
1432	Boletim da Sociedade Portuguesa de Entomologia, Suplemento	1	126392	0.998191453
1433	Boletim do Museu Nacional do Rio de Janeiro, Nova Serie, Zoologia	1	126393	0.998199351
1434	Boletin Chileno de Parasitologia	1	126394	0.998207248
1435	Bolet¡n de la Real Sociedad Espa¤ola de Historia Natural	1	126395	0.998215146
1436	Bolet¡n del Museo Nacional de Chile	1	126396	0.998223044
1437	Bollettino dei Musei e degli Istituti Biologici della Reale Universit? di Genova	1	126397	0.998230941
1438	Bollettino della Societ Eustachiana	1	126398	0.998238839
1439	Bornemann	1	126399	0.998246736
1440	Buletin Stiintific. Sectia de Biologic si Stiinte Agricole	1	126400	0.998254634
1441	Bull. Mus. natn. Hist. nat. Par	1	126401	0.998262531
1442	Bulletin de la Societ des Sciences de Bucarest	1	126402	0.998270429
1443	Bulletin de la Socit Linnenne de Bordeaux	1	126403	0.998278327
1444	Bulletin de la Socit Linnenne de Normandie	1	126404	0.998286224
1445	Bulletin de la Socit Linnenne de Provence	1	126405	0.998294122
1446	Bulletin de la Socit Nationale d'Acclimatation de France	1	126406	0.998302019
1447	Bulletin de la Socit Neuchteloise des Sciences Naturelles	1	126407	0.998309917
1448	Bulletin de l'Acadmie Royale des Sciences, des Lettres et des Beaux-Arts de Belgique	1	126408	0.998317815
1449	Bulletin des Sciences, par la Socit Philomatique	1	126409	0.998325712
1450	Bulletin of Institute of Liberal Arts Otemon Gakuin University	1	126410	0.99833361
1451	Bulletin of the British Ecological Society	1	126411	0.998341507
1452	Bulletin of the Faculty of Agriculture, Yamaguchi University	1	126412	0.998349405
1453	Bulletin of the Hoshizaki Green Foundation	1	126413	0.998357303
1454	Bulletin of the Huizhou Normal College	1	126414	0.9983652
1455	Bulletin of the Madras Government Museum	1	126415	0.998373098
1456	Bulletin of the Zoological Museum of the University of Amsterdam	1	126416	0.998380995
1457	Buruatian Scientifica Centre Siberian Branch Russian Academy of Sciences Press	1	126417	0.998388893
1458	?asopis N rodn¡ho Muzea	1	126418	0.99839679
1459	Ceylon Journal of Science	1	126419	0.998404688
1460	Chinese Forestry Publishing House	1	126420	0.998412586
1461	Chro?my Przyrod? Ojczyst?	1	126421	0.998420483
1462	Comm. Book 61th Birthd. Dr. T. Yaginuma	1	126422	0.998428381
1463	Comptes Rendus Biologies	1	126423	0.998436278
1464	Comptes Rendus des Sances Mensuelles de la Societe des Sciences Naturelles et Physiques du Maroc	1	126424	0.998444176
1465	Congress of Yougoslavian Speleologists 3, Sarajevo	1	126425	0.998452074
1466	Conservation Reports of the Minami-Iwojima Wilderness Area	1	126426	0.998459971
1467	Conservazione Habitat Invertebrati	1	126427	0.998467869
1468	Contributions from Baylor University Museum	1	126428	0.998475766
1469	Cosejo Superior de Investigaciones Cient¡ficas	1	126429	0.998483664
1470	Countryside	1	126430	0.998491561
1471	Det Kongelige Danske Videnskabernes Selskabs Skrifter	1	126431	0.998499459
1472	Die Zrcherische Jugend, von der Naturforschenden Gesellschaft	1	126432	0.998507357
1473	Discovery Report	1	126433	0.998515254
1474	Dominion Museum Records in Entomology	1	126434	0.998523152
1475	Don nt£li Dolgozatok Termeszettudomanyi Sorozat	1	126435	0.998531049
1476	Ecology	1	126436	0.998538947
1477	Endins	1	126437	0.998546845
1478	Entomologische Zeitschrift, Guben	1	126438	0.998554742
1479	Entomologisches Nachrichtenblatt Troppau	1	126439	0.99856264
1480	Entomologist's Gazette	1	126440	0.998570537
1481	Environment Conservation Journal	1	126441	0.998578435
1482	Ergeb. Deutsch. Tiefsee-Exped. Valdivia	1	126442	0.998586332
1483	Ergebnisse der Wissenschaftlichen Untersuchungen im Schweizerischen Nationalpark	1	126443	0.99859423
1484	Ethology	1	126444	0.998602128
1485	Fauna Bohemiae Septentrionalis	1	126445	0.998610025
1486	Fermin-Didot et Cie	1	126446	0.998617923
1487	Field Naturalist	1	126447	0.99862582
1488	Folia Entomologica	1	126448	0.998633718
1489	Freunde des Klner Zoos	1	126449	0.998641616
1490	Glasnik Hrvatskoga Prirodoslovnoga Drutva	1	126450	0.998649513
1491	Godi?nje Izvje??e carsko-kraljevski Velike Realke u Splitu	1	126451	0.998657411
1492	Guangxi Plant Protection	1	126452	0.998665308
1493	Harper's New Monthly Magazine	1	126453	0.998673206
1494	Hunan Science and Techology Press	1	126454	0.998681103
1495	Hyogo Biology	1	126455	0.998689001
1496	Il Grottesco, Bollettino del Gruppo Grotte Milano CAI-SEM	1	126456	0.998696899
1497	International Congress of Entomology Proceedings	1	126457	0.998704796
1498	International Journal of Academic Research	1	126458	0.998712694
1499	International Journal of Zoology	1	126459	0.998720591
1500	International Rice Research Newsletter	1	126460	0.998728489
1501	Israel Journal of Entomology	1	126461	0.998736387
1502	?stanbul niversitesi Fen Fakltesi Mecmuas?	1	126462	0.998744284
1503	Izvestiya Ministerstva Nauki-Akademii Nauk Respubliki Kazakhstan Seriya Biologicheskaya i Meditsinskaya	1	126463	0.998752182
1504	Izwestia Aleksiewskago Donskogo. Politeknitschieskago Instituta	1	126464	0.998760079
1505	Jornal de Agronomia, Piracicaba	1	126465	0.998767977
1506	Journal and Proceedings of the Royal Society of New South Wales	1	126466	0.998775874
1507	Journal de Physique, de Chimie et d'Histoire Naturelle, Paris	1	126467	0.998783772
1508	Journal of Agricultural University of Hebei	1	126468	0.99879167
1509	Journal of Anhui Teachers University	1	126469	0.998799567
1510	Journal of Arthropod-Borne Diseases	1	126470	0.998807465
1511	Journal of Experimental Sciences	1	126471	0.998815362
1512	Journal of Gansu Sciences	1	126472	0.99882326
1513	Journal of Hangzhou University, Natural Science	1	126473	0.998831158
1514	Journal of Henan Normal University	1	126474	0.998839055
1515	Journal of Medical Entomology	1	126475	0.998846953
1516	Journal of Shaanxi Normal University Natural Science Edition	1	126476	0.99885485
1517	Journal of Shaanxi Teacher's University Natural Science Edition	1	126477	0.998862748
1518	Journal of Taiwan Museum	1	126478	0.998870645
1519	Journal of Taiwan Normal University, Mathematics, Science, Technology	1	126479	0.998878543
1520	Journal of the Academy of Natural Sciences of Philadelphia	1	126480	0.998886441
1521	Journal of the Devon Trust for Nature Conservation	1	126481	0.998894338
1522	Journal of the Entomological Society of British Columbia	1	126482	0.998902236
1523	Journal of the Hangzhou Teachers College	1	126483	0.998910133
1524	Journal of the Institute of Jamaica	1	126484	0.998918031
1525	Journal of the Jonan High School	1	126485	0.998925929
1526	Journal of the Society of British Entomologists	1	126486	0.998933826
1527	Journal of the Southeast Guizhou National Teacher's College	1	126487	0.998941724
1528	Journal of Xinjiang Normal College	1	126488	0.998949621
1529	Journal of Zaozhuang Normal College, Natural Science Edition	1	126489	0.998957519
1530	Journal on New Biological Reports	1	126490	0.998965416
1531	Kansas School Naturalist	1	126491	0.998973314
1532	Kishu-doshokobutsu	1	126492	0.998981212
1533	Kishu-doshokubutsu (Zoology and Botany in Kishu)	1	126493	0.998989109
1534	Kokin-shoin, Tokyo	1	126494	0.998997007
1535	Koninklijke Nederlandse Akademie van Wetenschappen Amsterdam	1	126495	0.999004904
1536	Kyushu University Press	1	126496	0.999012802
1537	La Semana Mdica, Buenos Aires	1	126497	0.9990207
1538	L'arachnologiste	1	126498	0.999028597
1539	Lingnan Science Journal	1	126499	0.999036495
1540	Livre cinquantenaire Inst. Spol. Emile Racovitza	1	126500	0.999044392
1541	Magazine of Natural History	1	126501	0.99905229
1542	Mathematikai s Termszettudom nyi rtes¡t?ÿ	1	126502	0.999060187
1543	Mathematische und Naturwissenschaftliche Berichte aus Ungarn	1	126503	0.999068085
1544	Melsheimer Entomological Series	1	126504	0.999075983
1545	Mmoires de la Socit Entomologique de Belgique	1	126505	0.99908388
1546	Mmoires de l'Acadmie Impriale des Sciences de St.-Ptersbourg	1	126506	0.999091778
1547	Memoirs of the National Museum of Victoria	1	126507	0.999099675
1548	Memorias y Revista de la Sociedad Cientifica "Antonio Alzate"	1	126508	0.999107573
1549	Memorie di Matematica e di Fisica della Societ Italiana delle Scienze	1	126509	0.999115471
1550	Microbiologia, Parazitologia, Epidemiologia	1	126510	0.999123368
1551	Miscellanea Zoologica Hungarica	1	126511	0.999131266
1552	Misi¢n Estudios de Patolog¡a Regional Argentina	1	126512	0.999139163
1553	Mitteilungen der Abteilung fr Zoologie am Landesmuseum Joanneum	1	126513	0.999147061
1554	Mitteilungen der Geographischen Gesellschaft in Lbeck	1	126514	0.999154958
1555	Mitteilungen der Pollichia	1	126515	0.999162856
1556	Mladinski Raziskovalni Tabori	1	126516	0.999170754
1557	Molecular Ecology	1	126517	0.999178651
1558	Monographiae Biologicae	1	126518	0.999186549
1559	Monthly Bulletin of the Philippine Health Service	1	126519	0.999194446
1560	N. Orianda	1	126520	0.999202344
1561	Nachrichten des Naturwissenschaftlichen Museums der Stadt Aschaffenburg	1	126521	0.999210242
1562	Nankiseibutu	1	126522	0.999218139
1563	Natur und Mensch	1	126523	0.999226037
1564	Natura Croatica	1	126524	0.999233934
1565	Natura, Amsterdam	1	126525	0.999241832
1566	Naturalistes Belges	1	126526	0.99924973
1567	Nature	1	126527	0.999257627
1568	Naturhistorisk Tidsskrift	1	126528	0.999265525
1569	Netherlands Journal of Zoology	1	126529	0.999273422
1570	Neue Schriften der Naturforschenden Gesellschaft zu Halle	1	126530	0.99928132
1571	New York Entomological Society	1	126531	0.999289217
1572	New Zealand Entomologist	1	126532	0.999297115
1573	Nieuwsbrief Spinnenwerkgroep Nederland	1	126533	0.999305013
1574	Novi Commentarii Academiae Scientiarum Imperialis Petropolitanae	1	126534	0.99931291
1575	Novitates Zoologicae	1	126535	0.999320808
1576	Orthobula's Box	1	126536	0.999328705
1577	Otemon Gakuin Univ. biol. Club	1	126537	0.999336603
1578	Oversigt over det Kongelige Danske Videnskabernes Selskabs Forhandlinger	1	126538	0.999344501
1579	Pakistan Journal of Agricultural Sciences	1	126539	0.999352398
1580	Payot	1	126540	0.999360296
1581	Peking Natural History Bulletin	1	126541	0.999368193
1582	Pergamon Press	1	126542	0.999376091
1583	Plant Protection Bulletin	1	126543	0.999383988
1584	Pr ce Brn?nsk Z kladny ?eskoslovensk Akademie V?d	1	126544	0.999391886
1585	Primer Congr. Latinoamer. Ent.	1	126545	0.999399784
1586	Pr¡roda, Brno	1	126546	0.999407681
1587	Proceedings and Transactions of the British Entomological and Natural History Society	1	126547	0.999415579
1588	Proceedings of the 1<sup>st</sup> Conference of the Central Agricultural Pesticide Laboratory	1	126548	0.999423476
1589	Proceedings of the Royal Society of Queensland	1	126549	0.999431374
1590	Pubblicazioni dell'Istituto di Entomologia dell'Universit di Pavia	1	126550	0.999439272
1591	Publicaciones Especiales del Instituto de Biolog¡a, Universidad Nacional Aut¢noma de Mxico	1	126551	0.999447169
1592	Publications of the Seto Marine Biological Laboratory	1	126552	0.999455067
1593	Quaderni della Stazione di Ecologia del Civico Museo di Storia Naturale di Ferrara	1	126553	0.999462964
1594	Quarterly Journal of Microscopical Science	1	126554	0.999470862
1595	Quarterly Journal of the Taiwan Museum	1	126555	0.999478759
1596	Records of the Queen Victoria Museum, Launceston	1	126556	0.999486657
1597	Reports of the Institute for Nature Study, Tokyo (Miscellaneous reports of the National Park for Nature Study)	1	126557	0.999494555
1598	Research Bulletin of the Panjab University	1	126558	0.999502452
1599	Research Bulletin of the Panjab University, New Series	1	126559	0.99951035
1600	Research Bulletin of the Panjab University, Zoology	1	126560	0.999518247
1601	Res£menes y Comunicaciones, I Jornadas de Ciencias Naturales, Montevideo	1	126561	0.999526145
1602	Revista de la Ca?tedra de Microbiologi?a y Parasitologi?a, Buenos Aires	1	126562	0.999534043
1603	Revista Nicaraguense de Entomolog¡a	1	126563	0.99954194
1604	Revista Peruana de Medicina Experimental y Salud Publica	1	126564	0.999549838
1605	Revistas de la Facultad de Ciencias Exactas, F¡sicas y Naturales de la Universidad Nacional de C¢rdoba	1	126565	0.999557735
1606	Revue d'cologie et de Biologie du Sol	1	126566	0.999565633
1607	Revue Roumaine de Biologie	1	126567	0.99957353
1608	Rigaku-kai	1	126568	0.999581428
1609	Romanian Journal of Biology - Zoology	1	126569	0.999589326
1610	Sahlbergia	1	126570	0.999597223
1611	Sborn¡k P?¡rodov?deckho Klubuv Uherskm Hradi?ti	1	126571	0.999605121
1612	Sborn¡k Severo?eskho Muzea	1	126572	0.999613018
1613	Science	1	126573	0.999620916
1614	Scientific Reports, Series C	1	126574	0.999628814
1615	Scientific Research and Essay	1	126575	0.999636711
1616	Sichuan Journal of Agricultural Science	1	126576	0.999644609
1617	Skl¡pkan	1	126577	0.999652506
1618	Societas Historico-Naturalis Croatica	1	126578	0.999660404
1619	Southwestern Naturalist	1	126579	0.999668301
1620	Speleon	1	126580	0.999676199
1621	Spolia Zeylan	1	126581	0.999684097
1622	Studia Societatis Scientiarum Torunensis, Sectio E, Zoologia	1	126582	0.999691994
1623	Studia Universitatis Babe?-Bolyai Biologia	1	126583	0.999699892
1624	Studien aus dem Gebiete der Allgemeinen Karstforschung	1	126584	0.999707789
1625	Studio Bergamo	1	126585	0.999715687
1626	Systematic Parasitology	1	126586	0.999723585
1627	Systematic Zoology	1	126587	0.999731482
1628	Tane	1	126588	0.99973938
1629	The Bison	1	126589	0.999747277
1630	The Popular Science Monthly	1	126590	0.999755175
1631	Tian Ze Publishing House	1	126591	0.999763072
1632	Toxicon	1	126592	0.99977097
1633	Trabajos del Laboratorio de Zoologia de la Universidad de Chile	1	126593	0.999778868
1634	Transactions of the Hertfordshire Natural History Society and Field Club	1	126594	0.999786765
1635	Transactions of the Liaoning Zoological Society	1	126595	0.999794663
1636	Trav. Inst. Spol. "mile Racovitza"	1	126596	0.99980256
1637	Travaux de l'Institut Agricole d'Azow-Mer Noire	1	126597	0.999810458
1638	Troudy Obtchiestwa Ispytatelei Prirody pri Imperatorskom Charkowskom Ouniwersitete	1	126598	0.999818356
1639	Trudy Alma-Atinskogo Gosudarstvennogo Zapovednika	1	126599	0.999826253
1640	Trudy Soveta po Izuceniju Proizvoditeljnych Sil, Serija Turkmenskaja	1	126600	0.999834151
1641	bersicht der Arbeiten und Vernderungen der Schlesischen Gesellschaft fr Vaterlndische Kultur im Jahre	1	126601	0.999842048
1642	Uchenye Zapiski Molotovskogo Universiteta	1	126602	0.999849946
1643	Universidad Antioquia	1	126603	0.999857843
1644	Utschenjich Zapisok Permskogo Universitete	1	126604	0.999865741
1645	Vestnik Orenburgskogo gosudarstvennogo Universiteta	1	126605	0.999873639
1646	Vie et Milieu, Supplement	1	126606	0.999881536
1647	Weta	1	126607	0.999889434
1648	Wuyi Science Journal	1	126608	0.999897331
1649	Zara, Fratelli Battara	1	126609	0.999905229
1650	Zeitschrift fr Angewandte Entomologie	1	126610	0.999913127
1651	Zeitschrift fr die Gesammten Naturwissenschaften, Neue Folge	1	126611	0.999921024
1652	Zeitschrift fr Morphologie der Tiere	1	126612	0.999928922
1653	Zhivotnii mir SSSR, zona stepei.	1	126613	0.999936819
1654	Ziva	1	126614	0.999944717
1655	Zoe	1	126615	0.999952614
1656	Zoologia	1	126616	0.999960512
1657	Zoologica Poloniae	1	126617	0.99996841
1658	Zoological Survey of India, Conservation Area Series	1	126618	0.999976307
1659	Zoology	1	126619	0.999984205
1660	Zoomorphology	1	126620	0.999992102
1661	Zub¡a Monogr fico	1	126621	1
